# Supplementary material for: High-Mannose N-Glycans as Malignant Progression Markers in Early-Stage Colorectal Cancer
Source: MDPI journal article supplement (doi:10.3390/cancers14061552), 2022-03-18

## Legend:

-  Normal epithelium
-  Low-grade dysplasia
-  High-grade dysplasia
-  Cancer
-  Pseudoinvasion
-  High-grade dysplasia or cancer

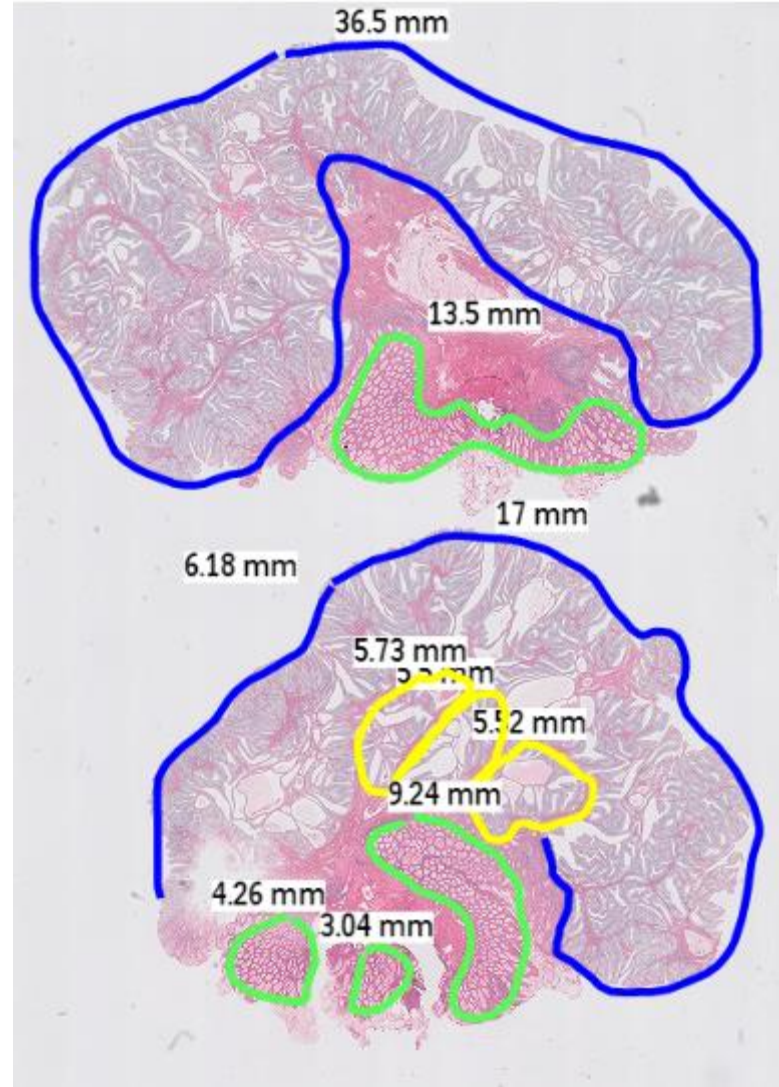

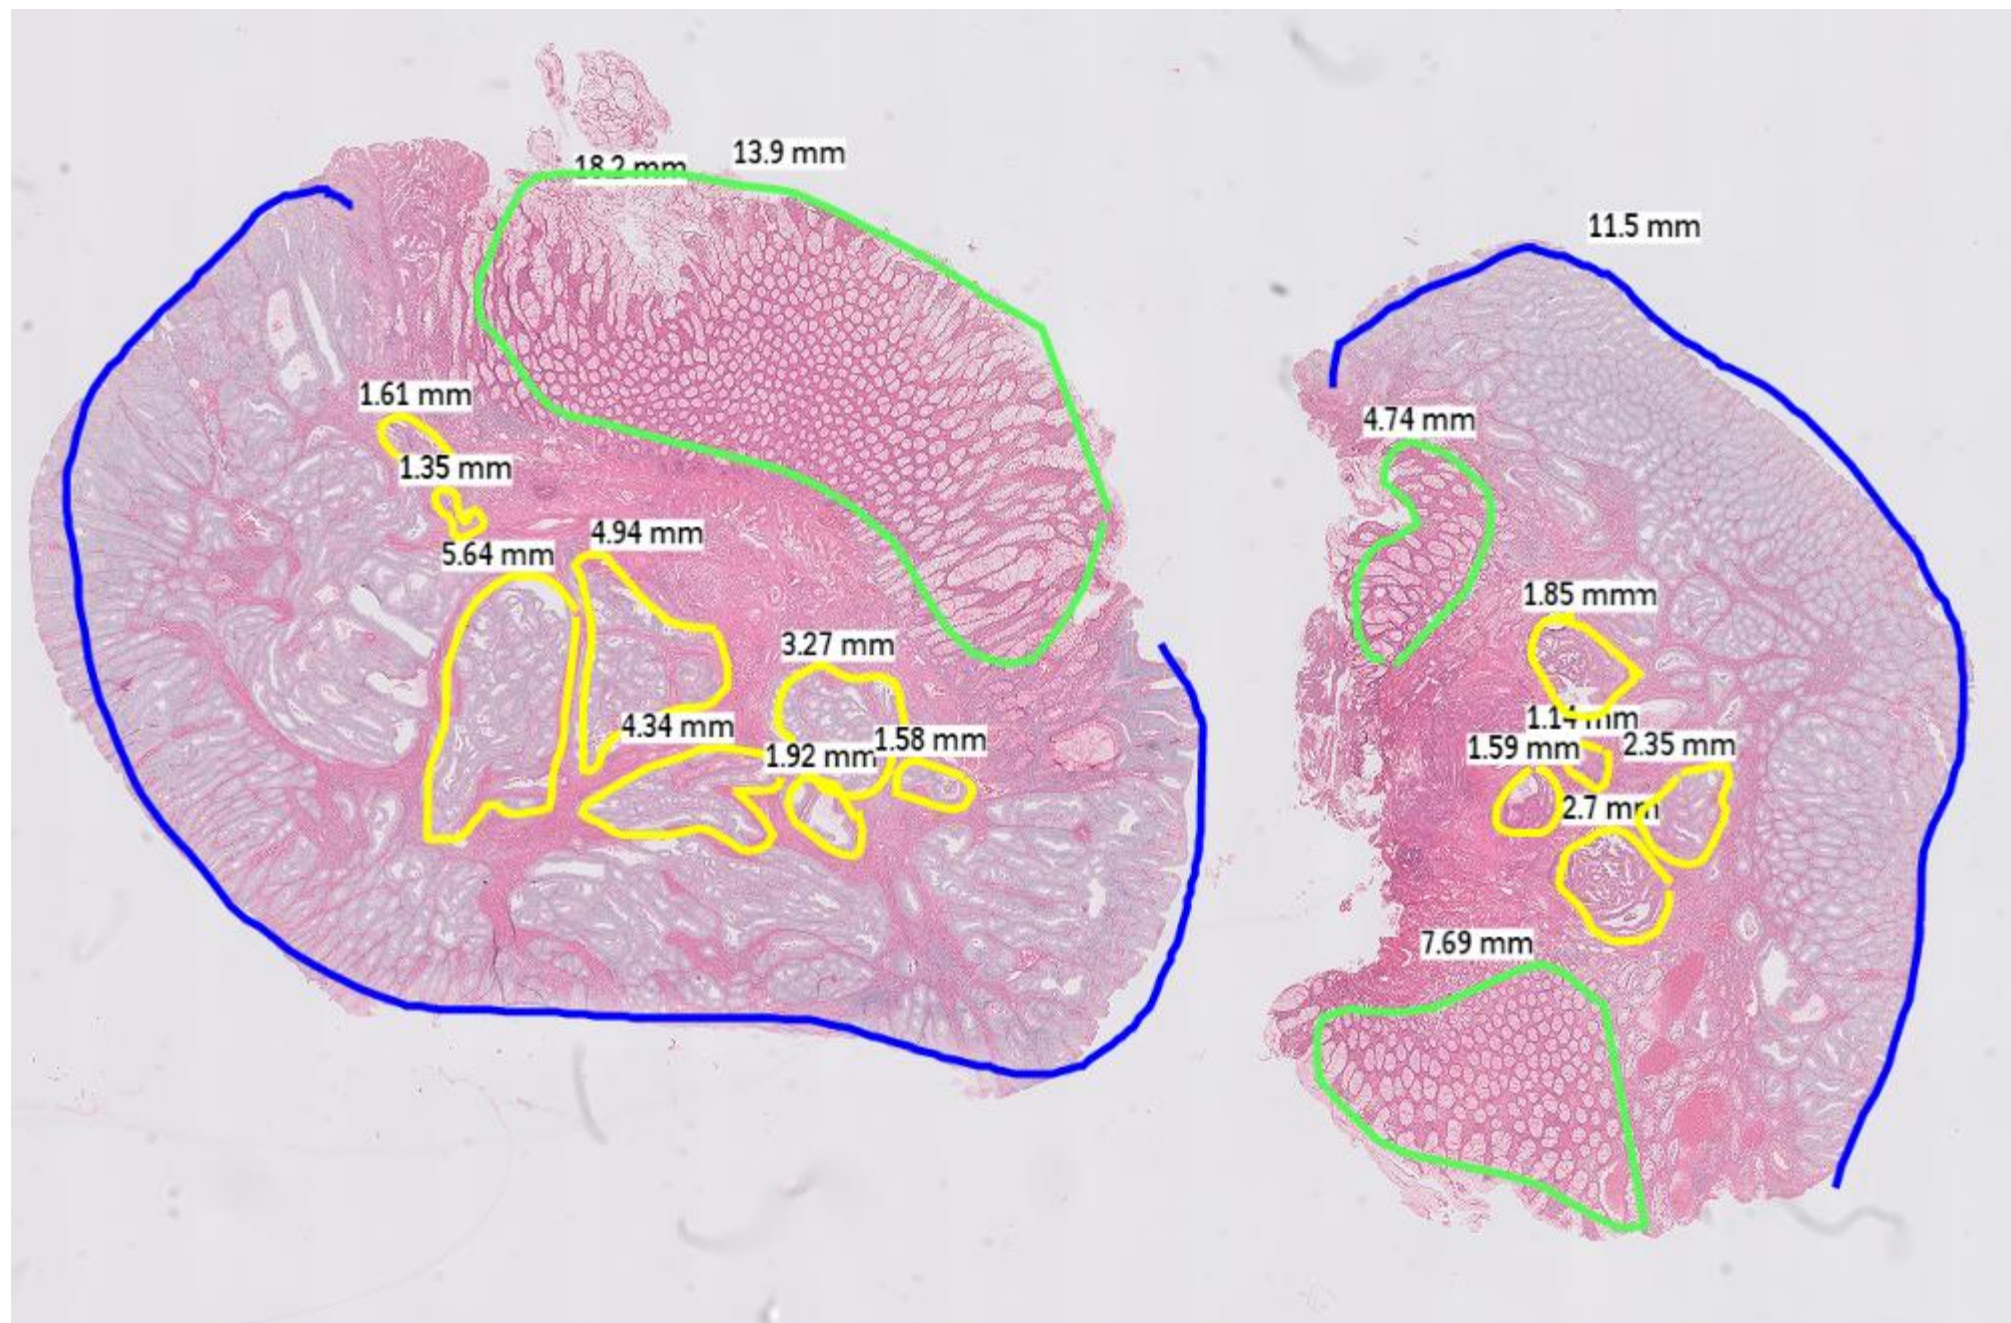



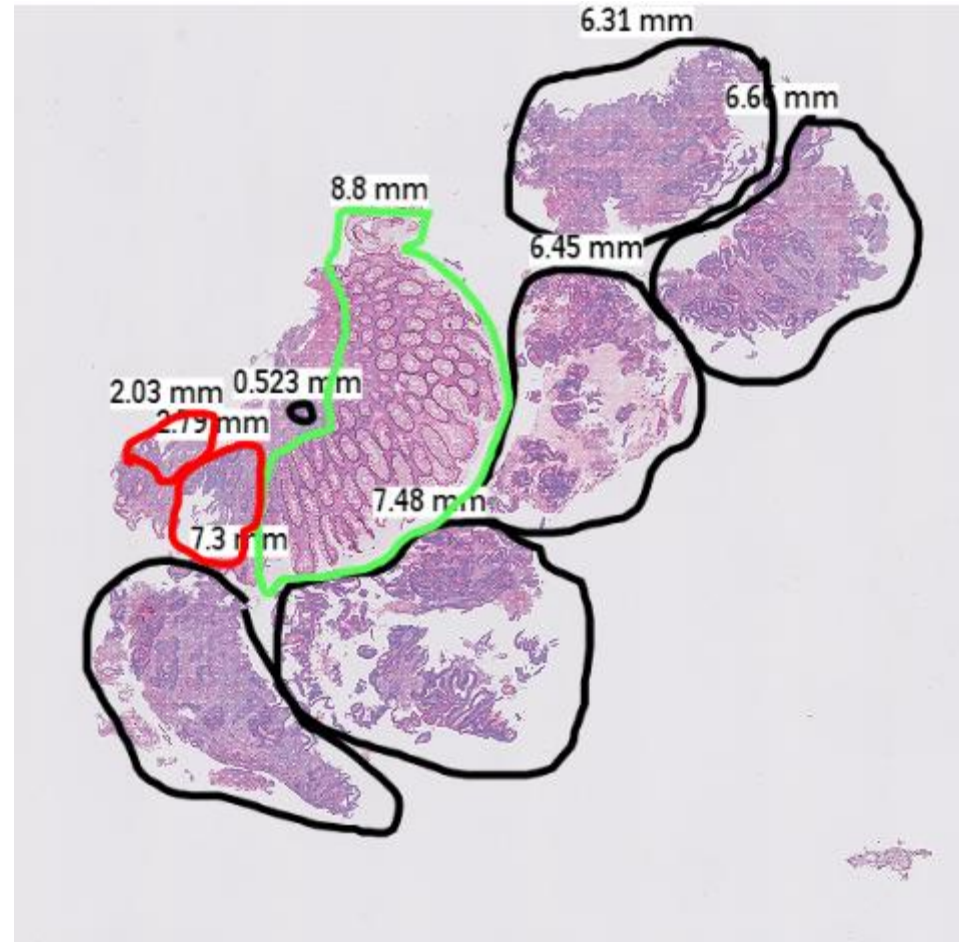

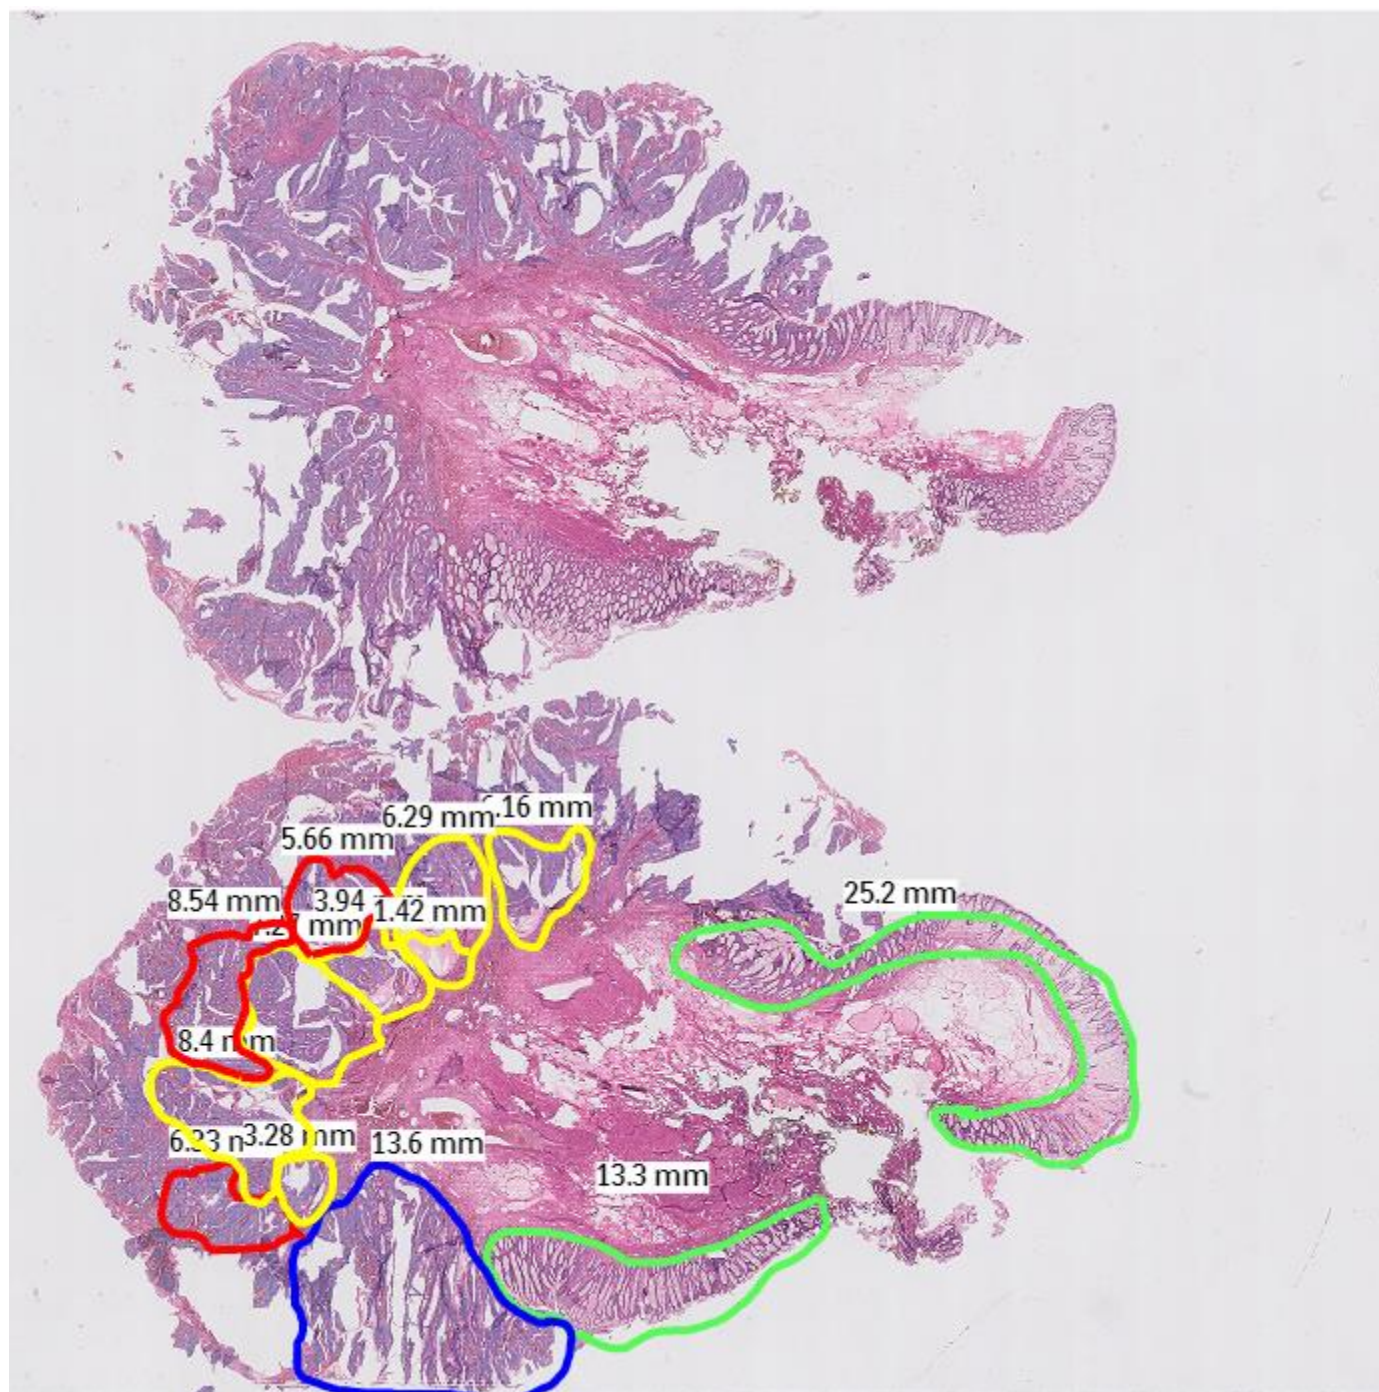



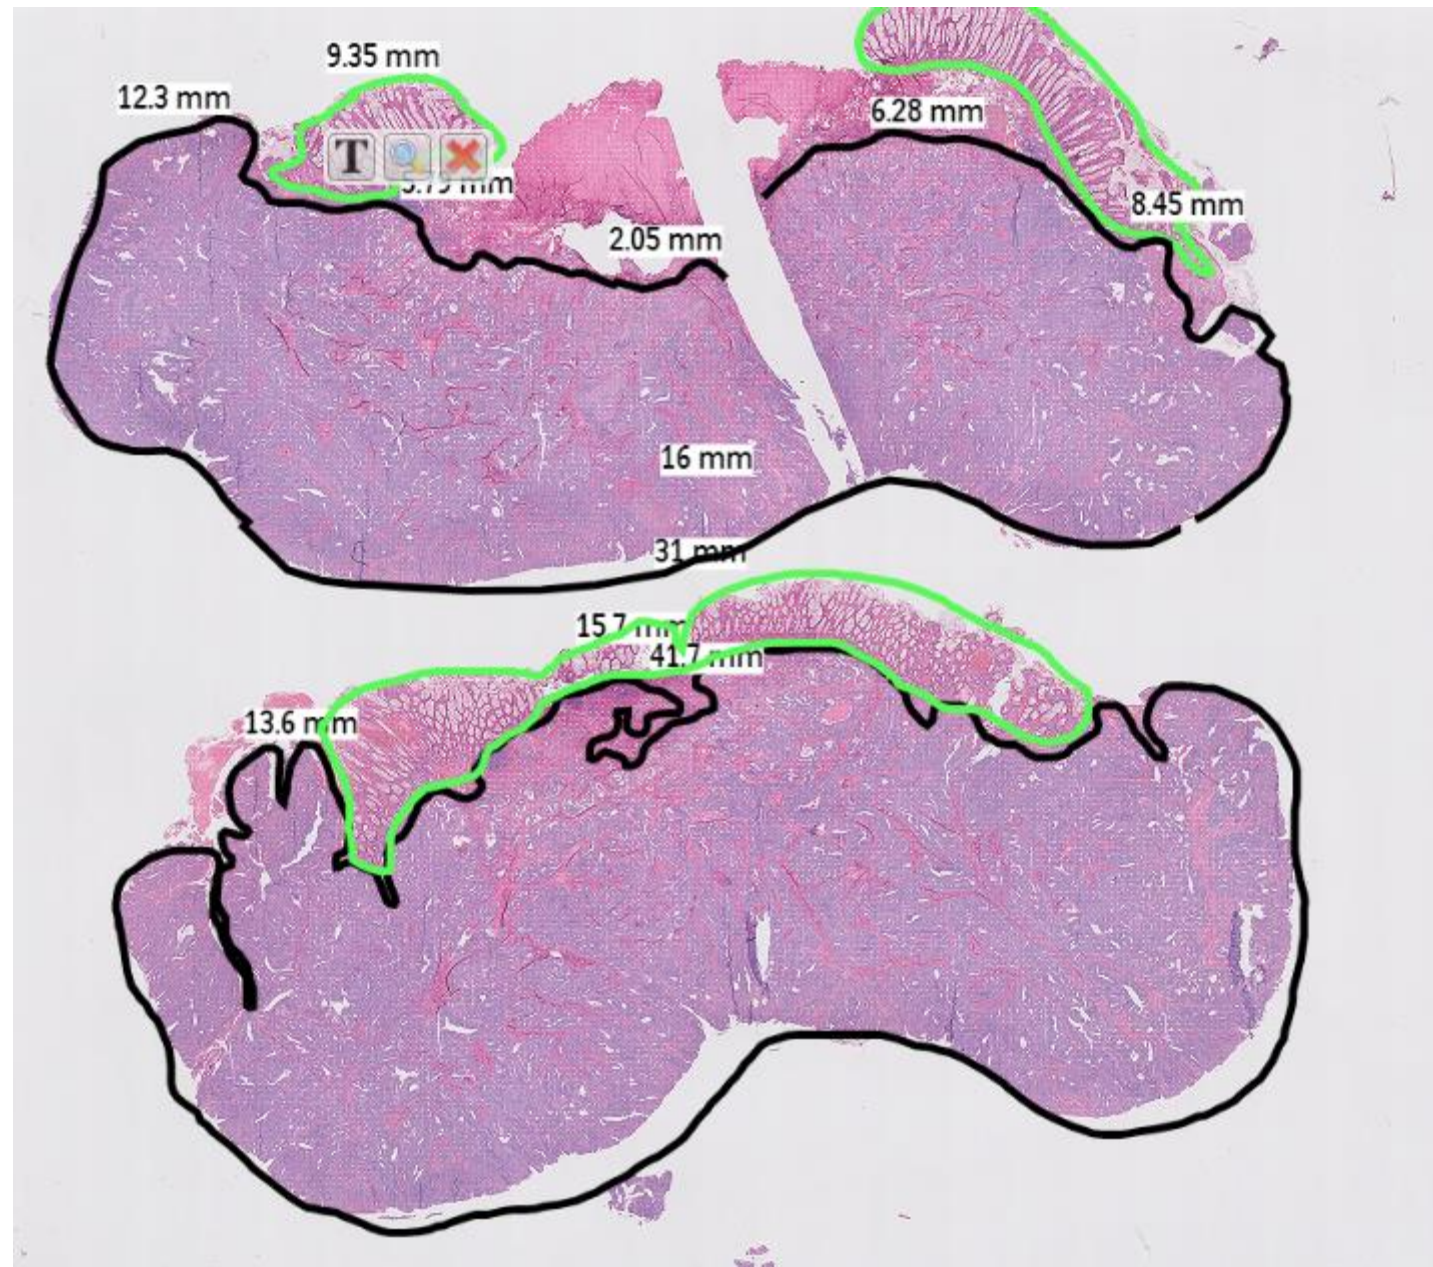

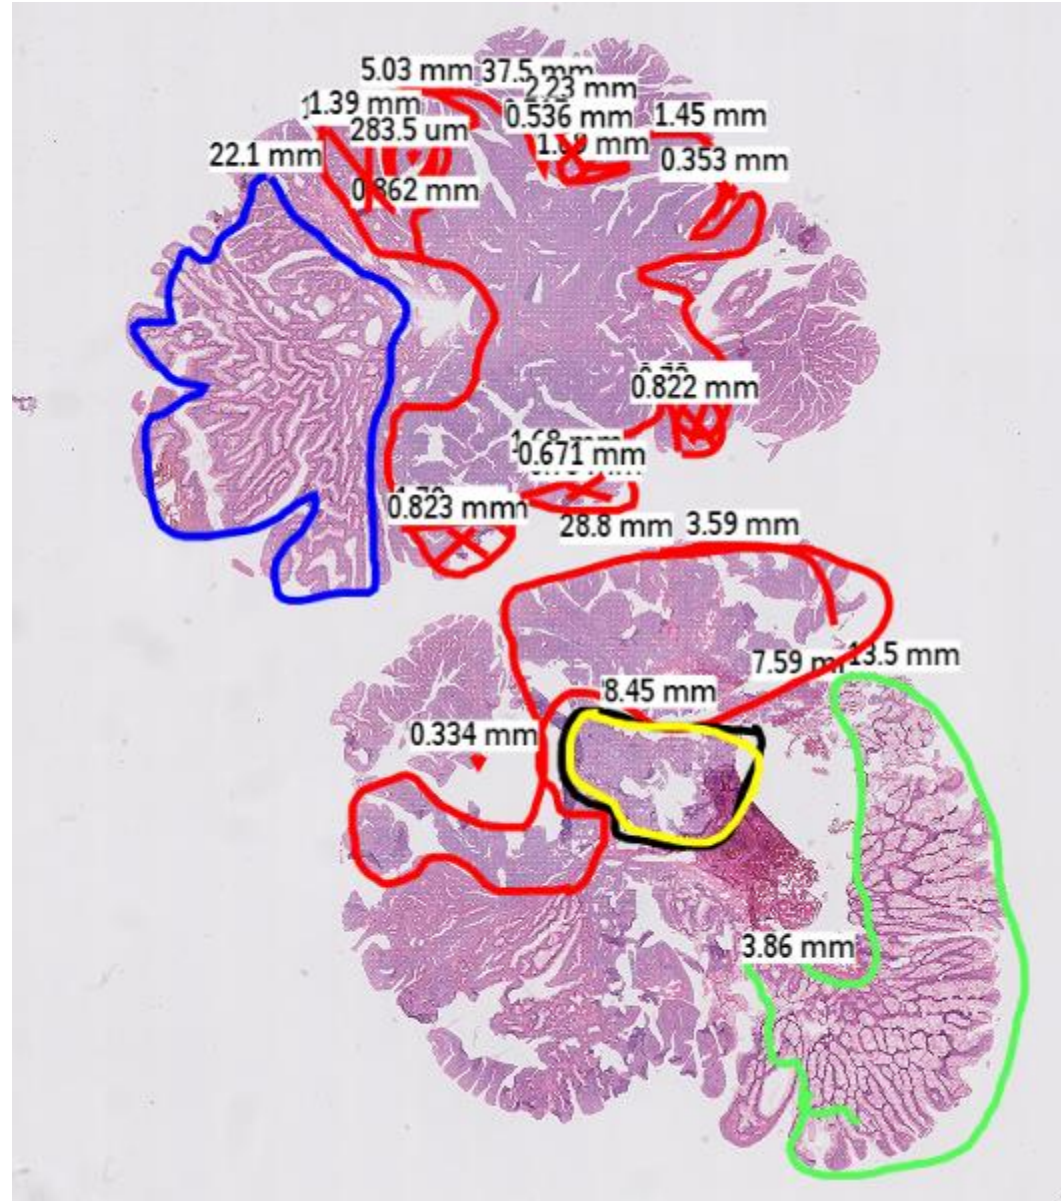



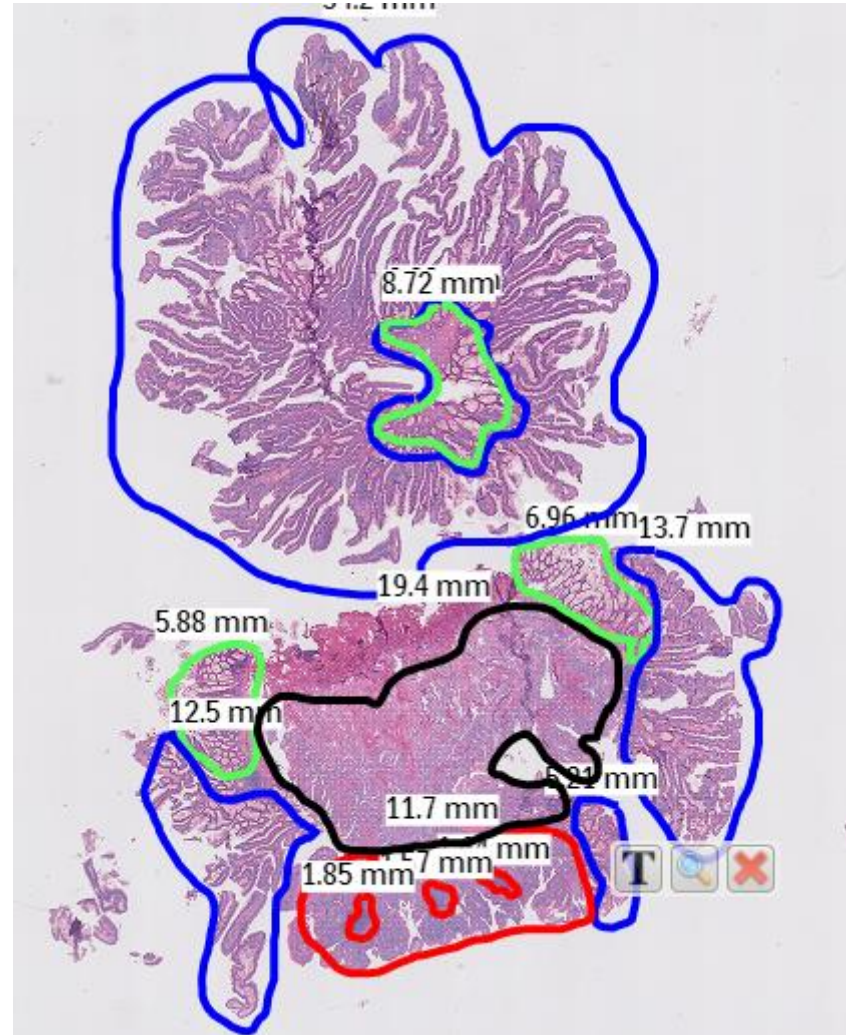



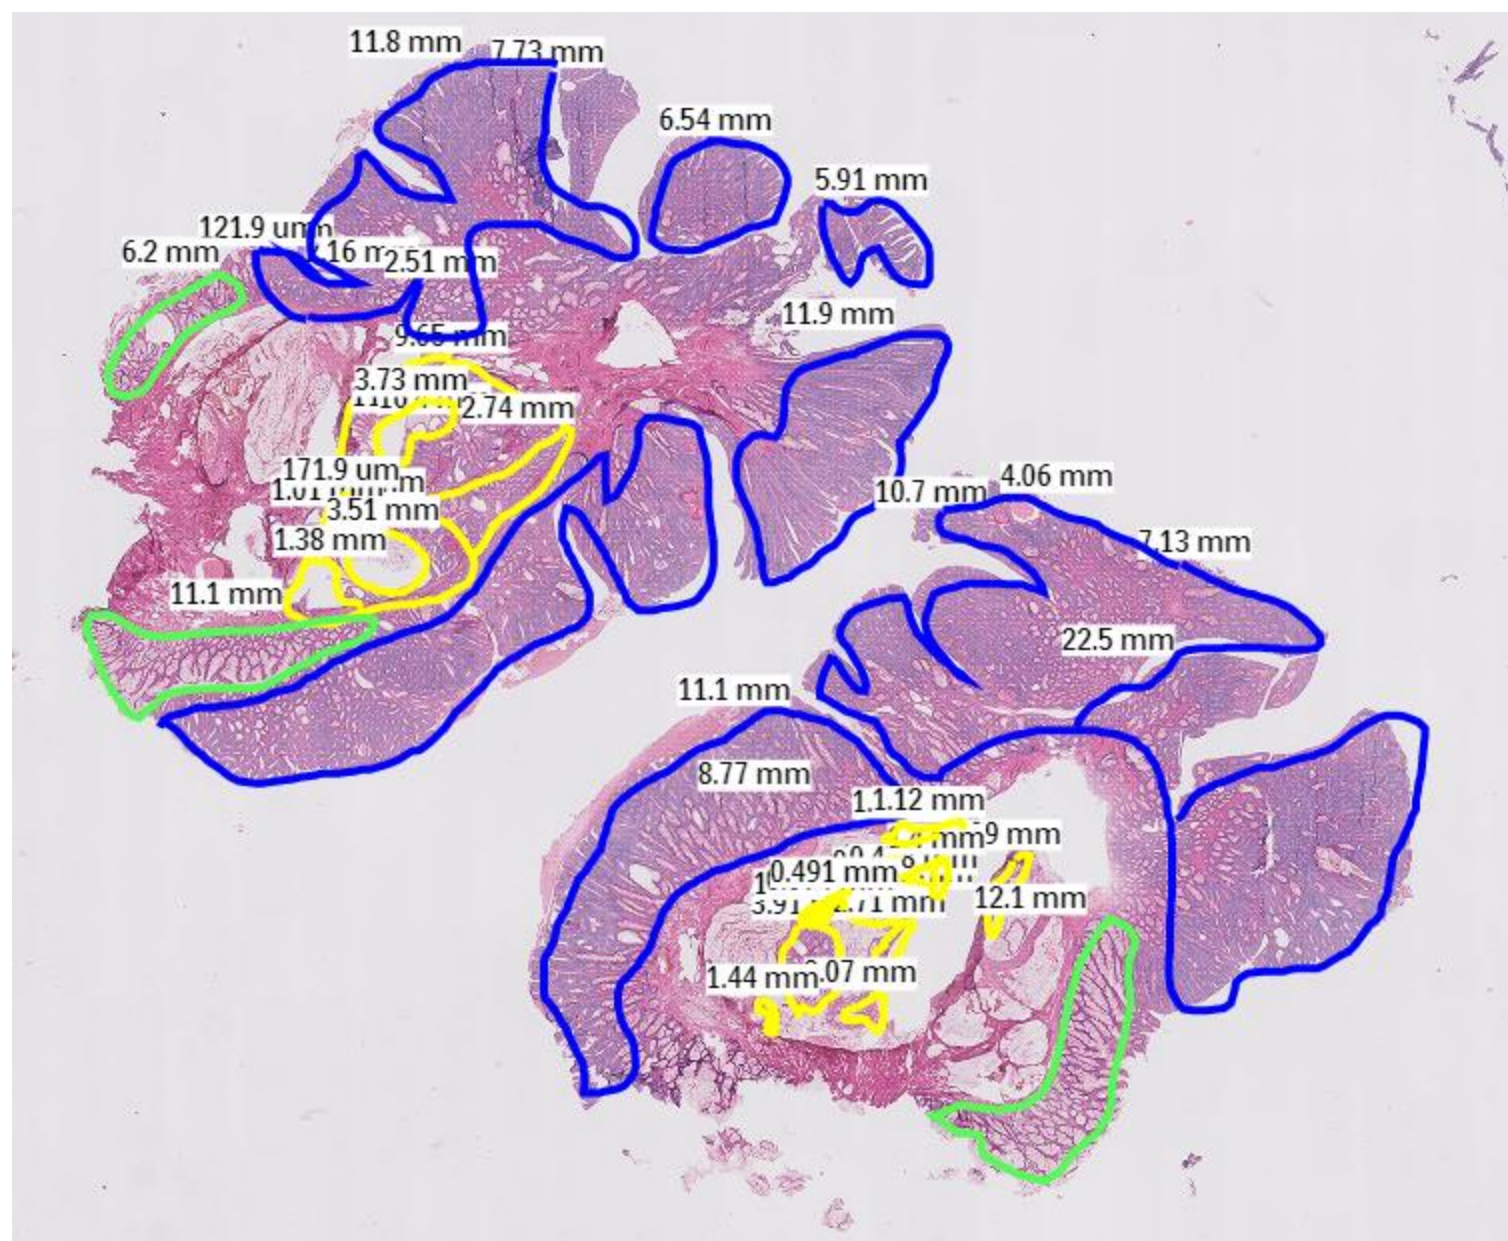

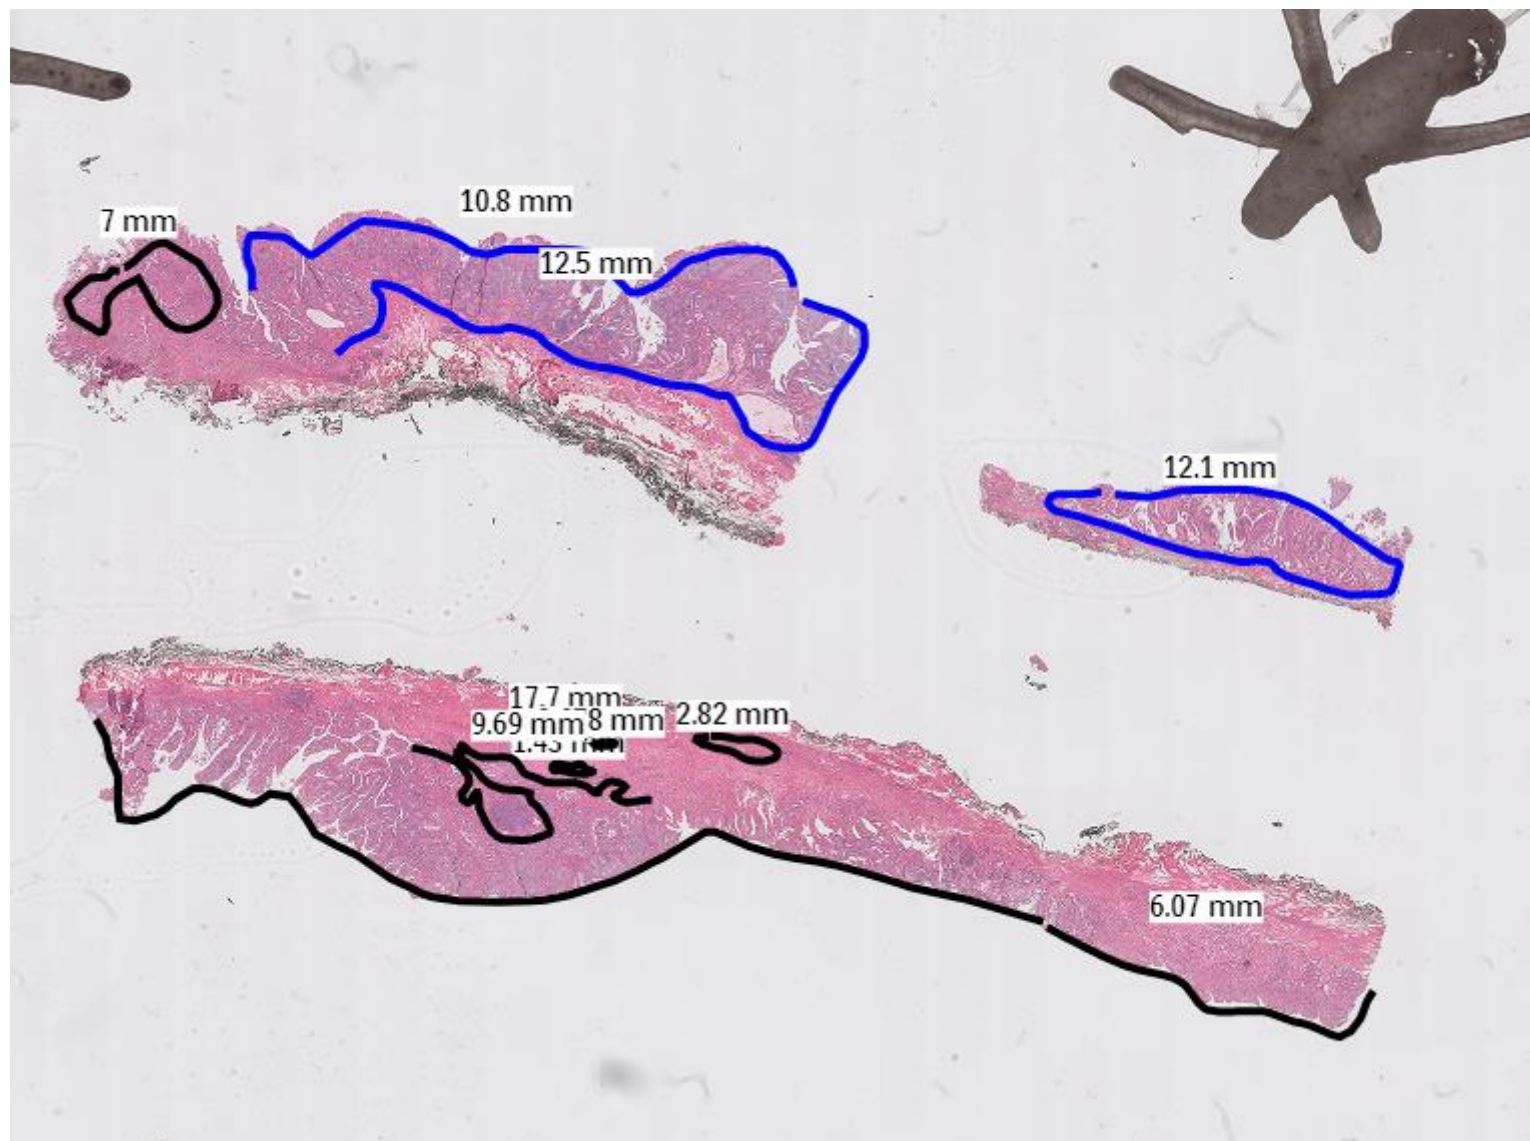

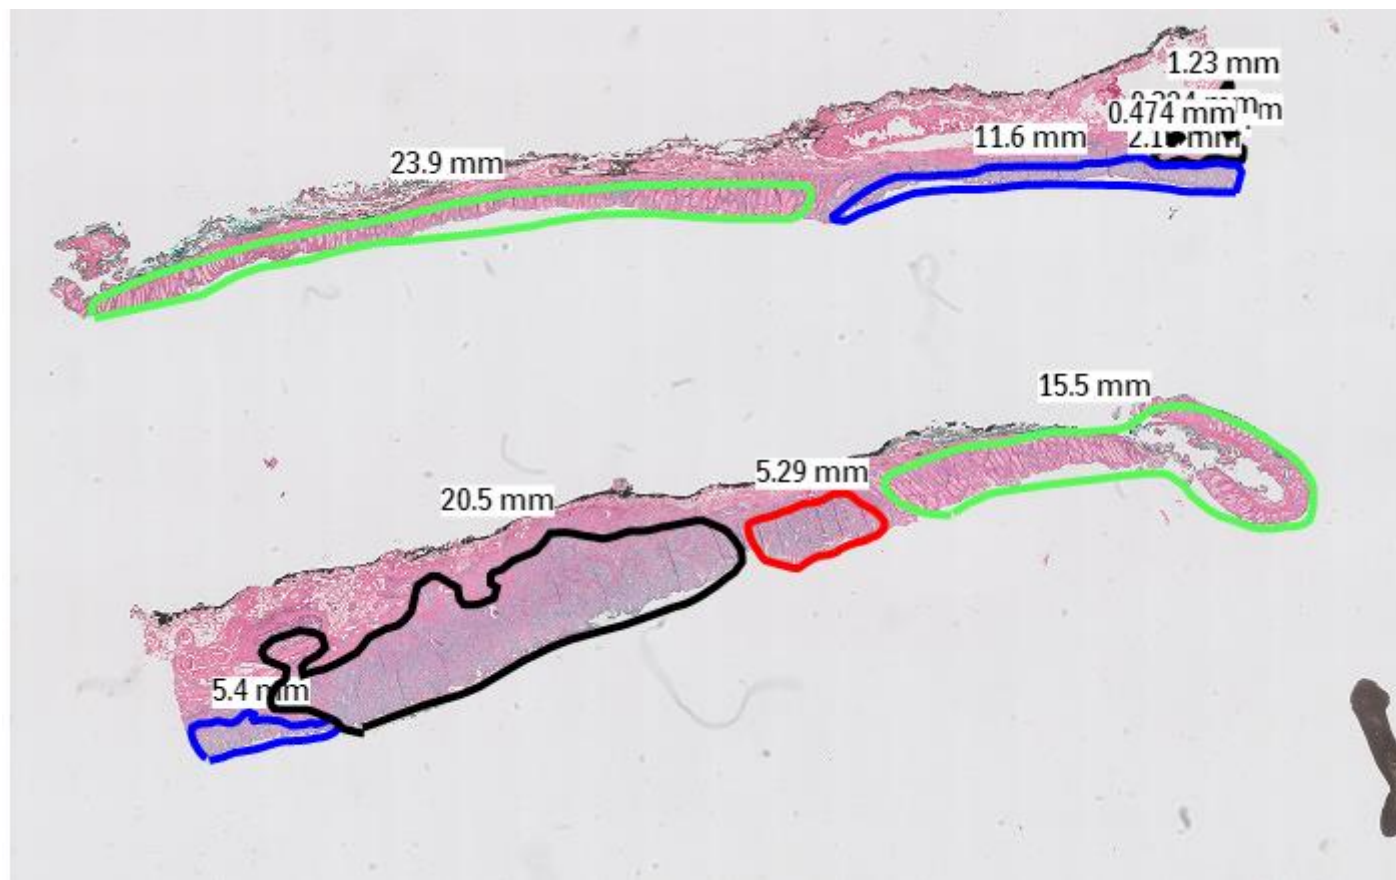



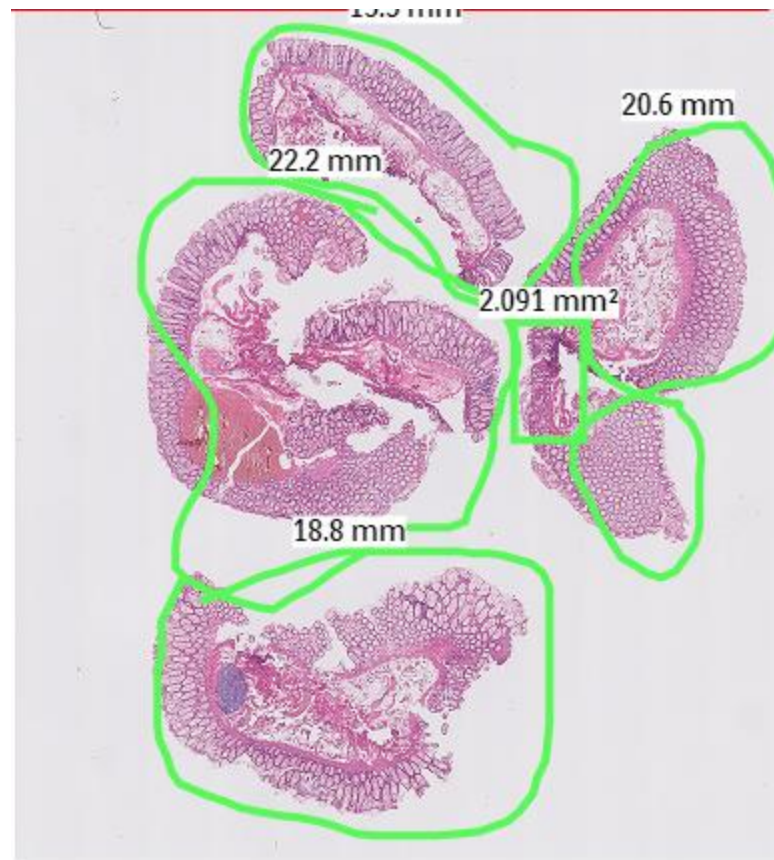

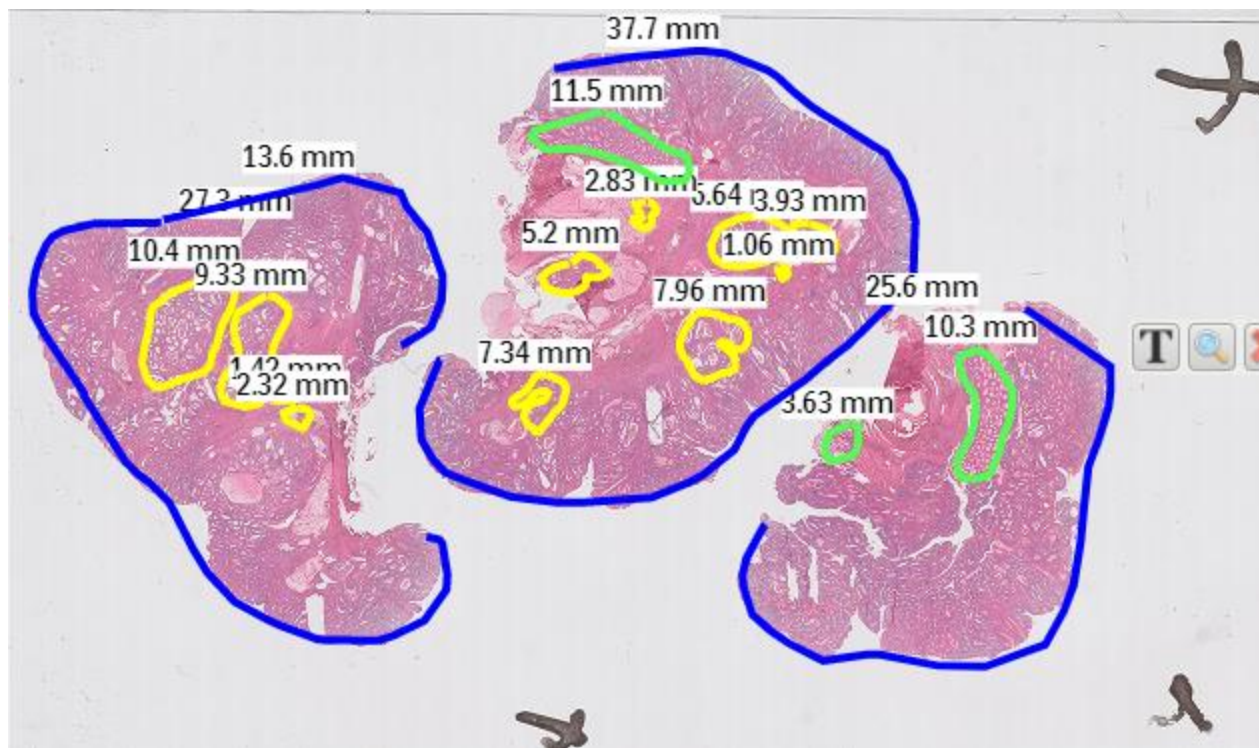

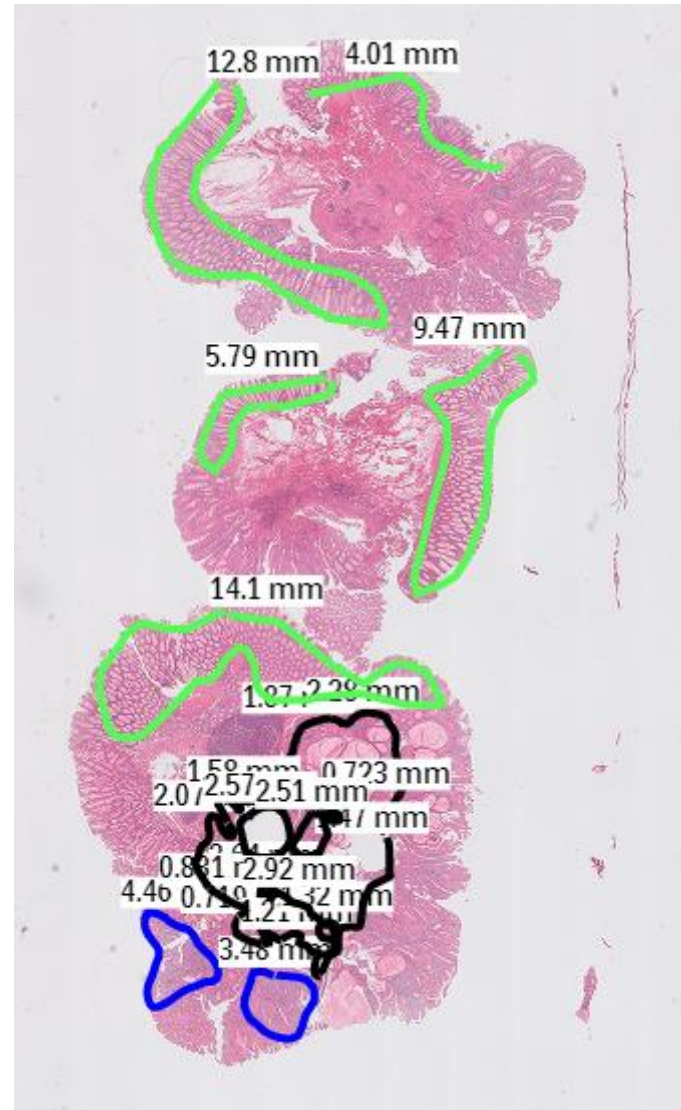



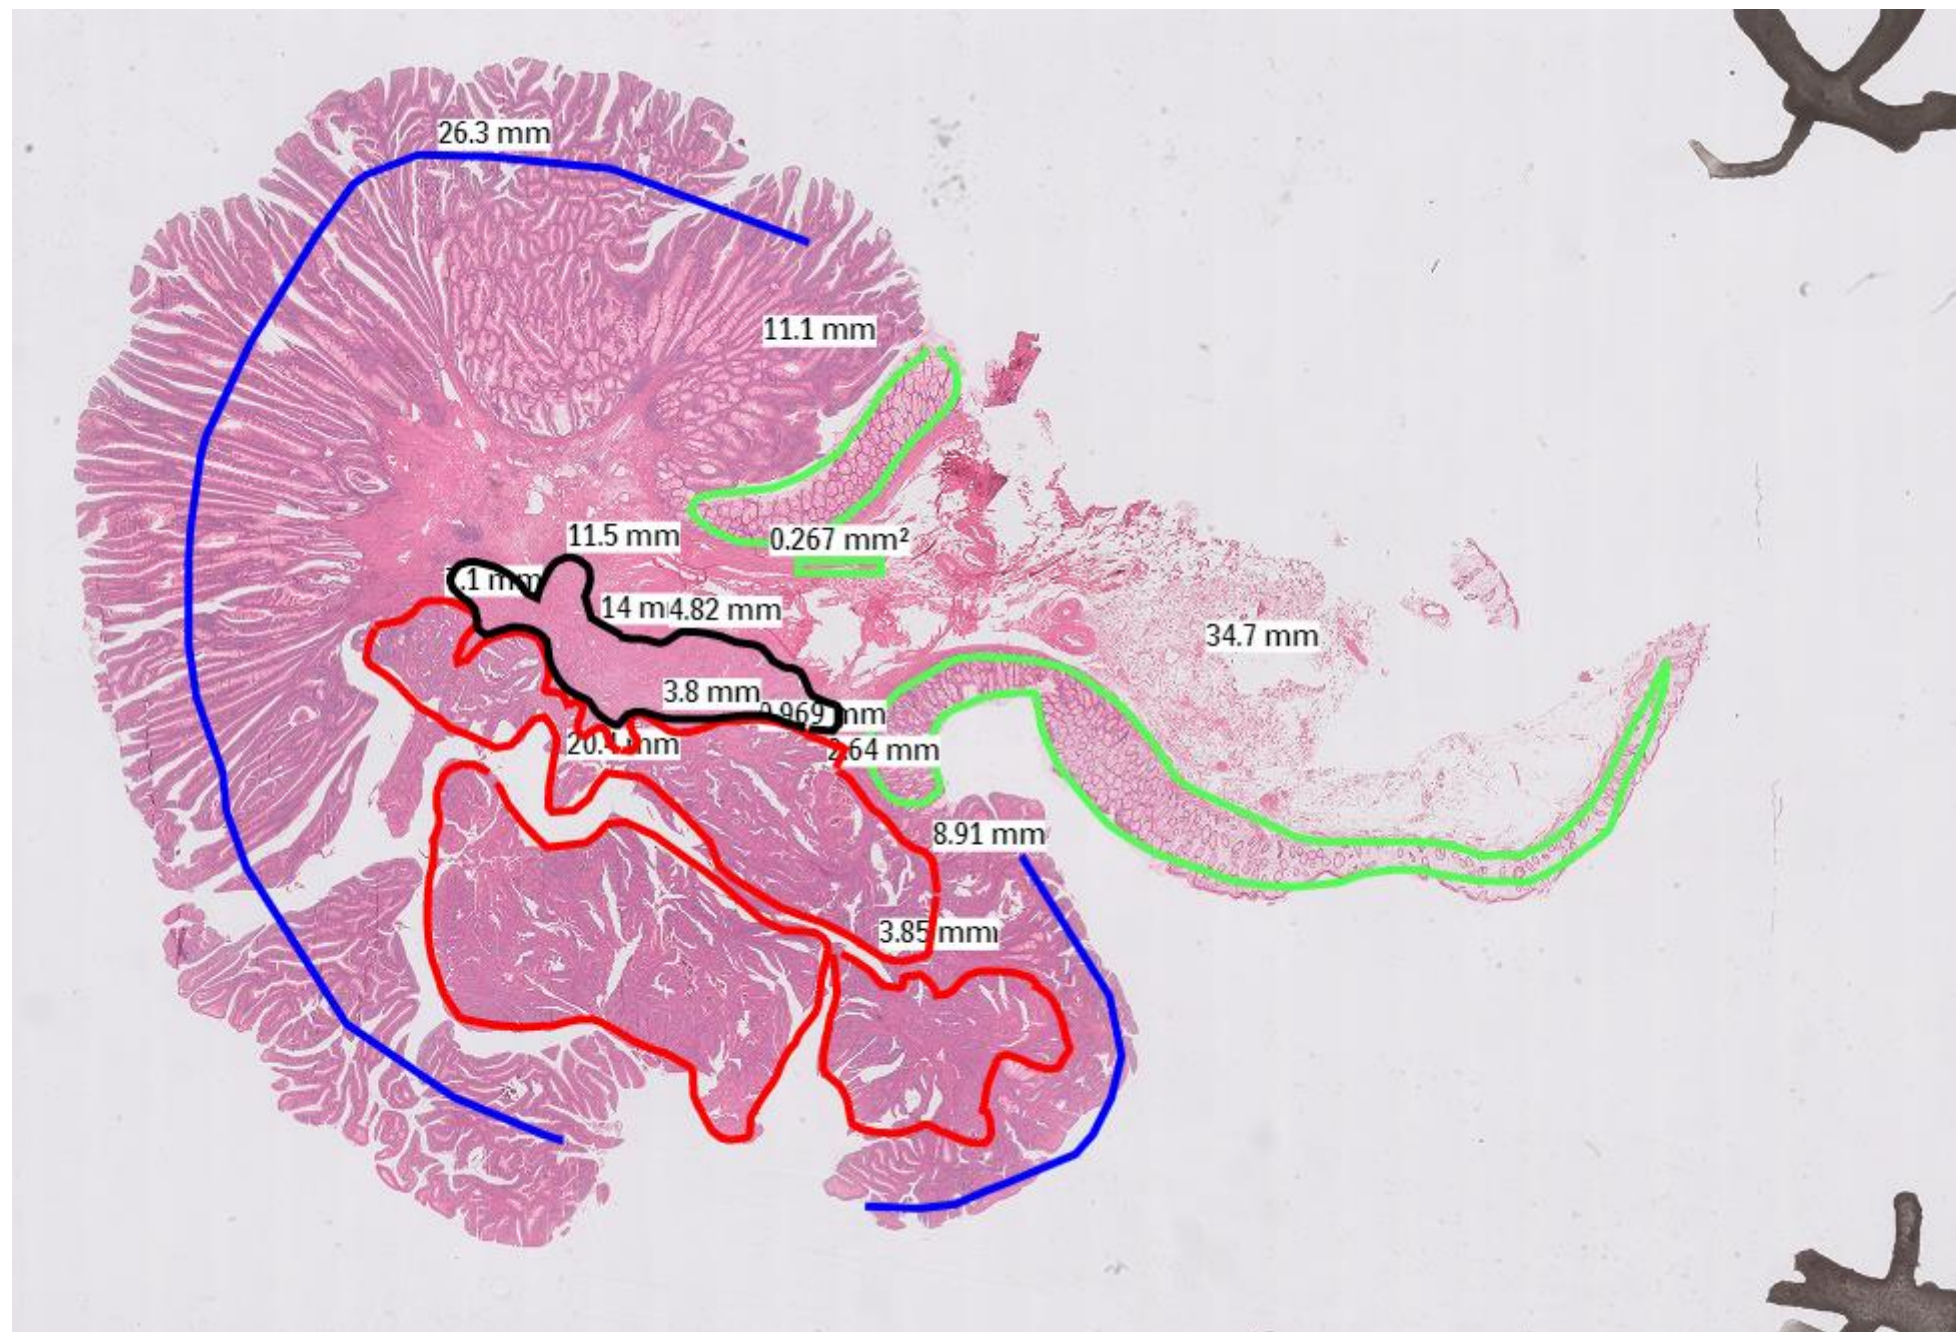

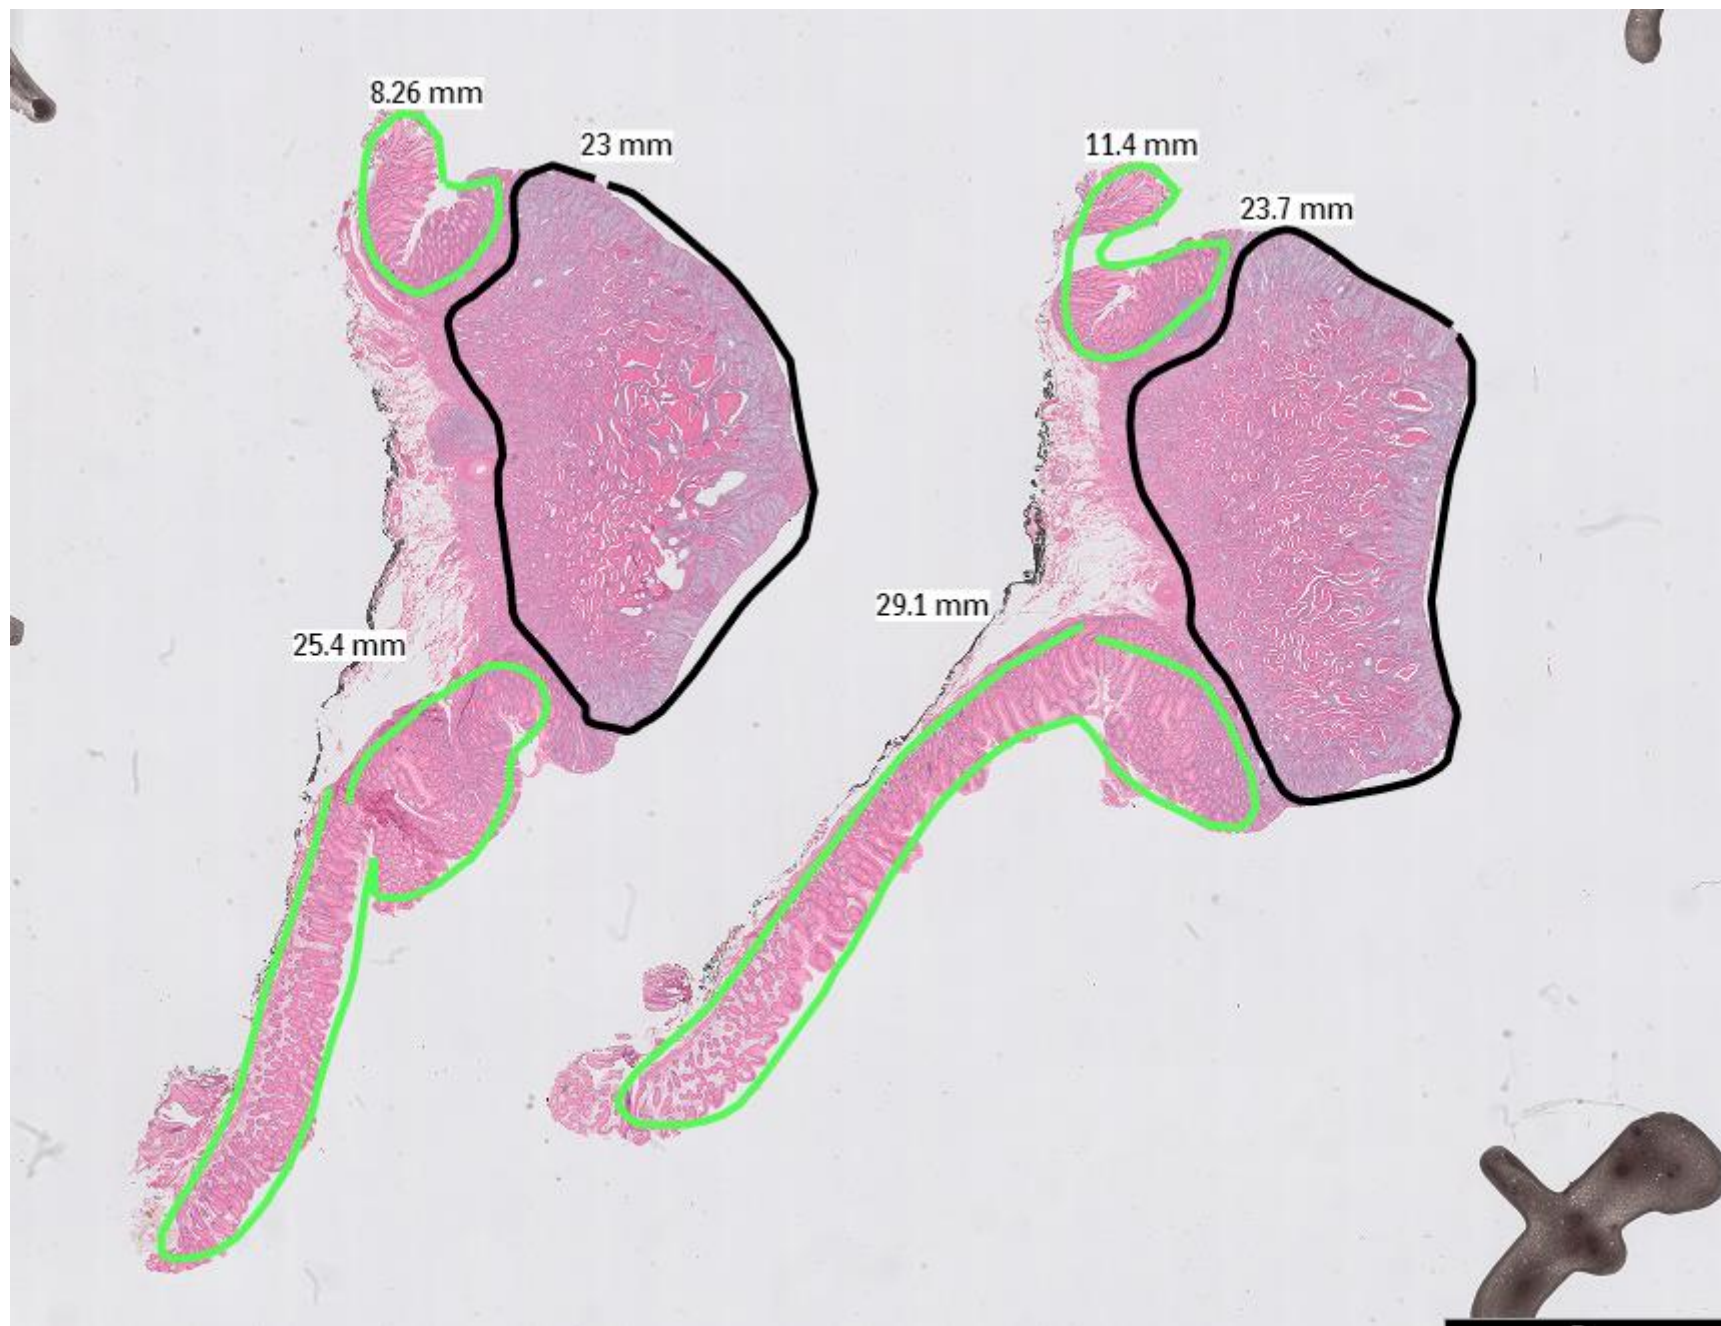



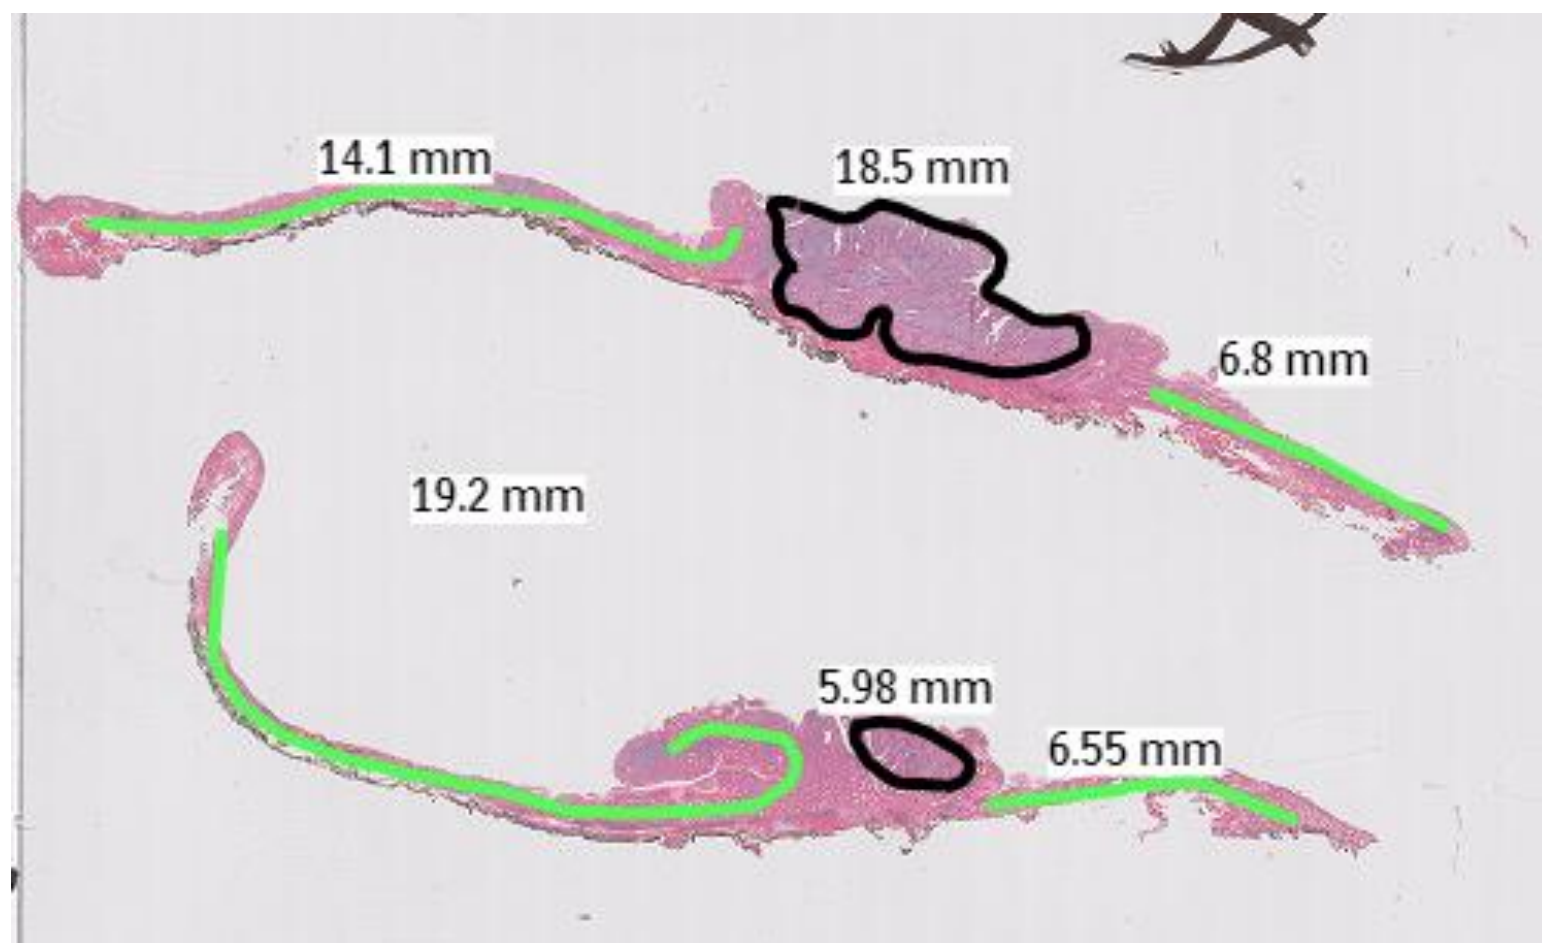



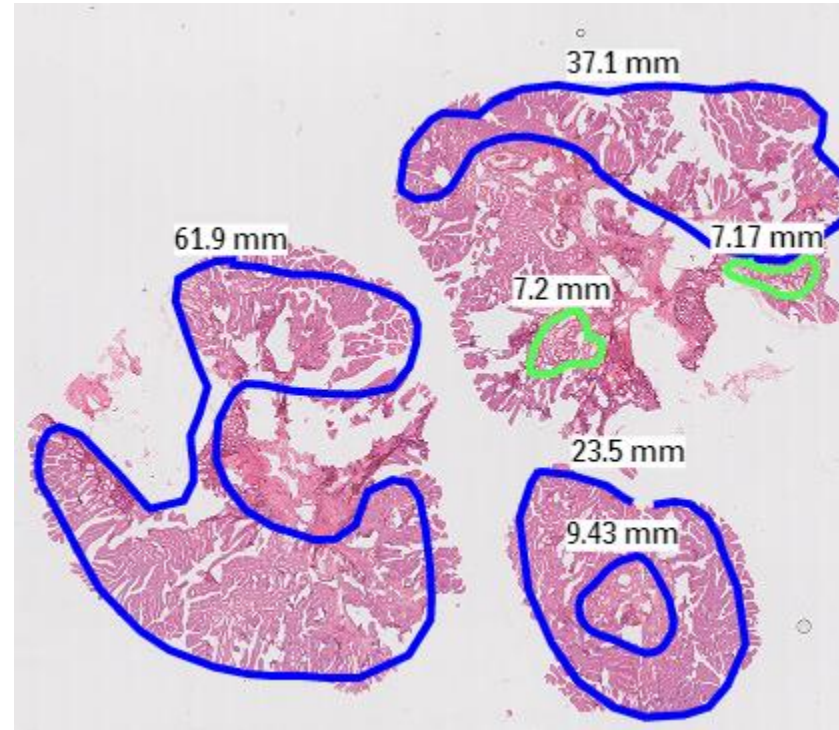

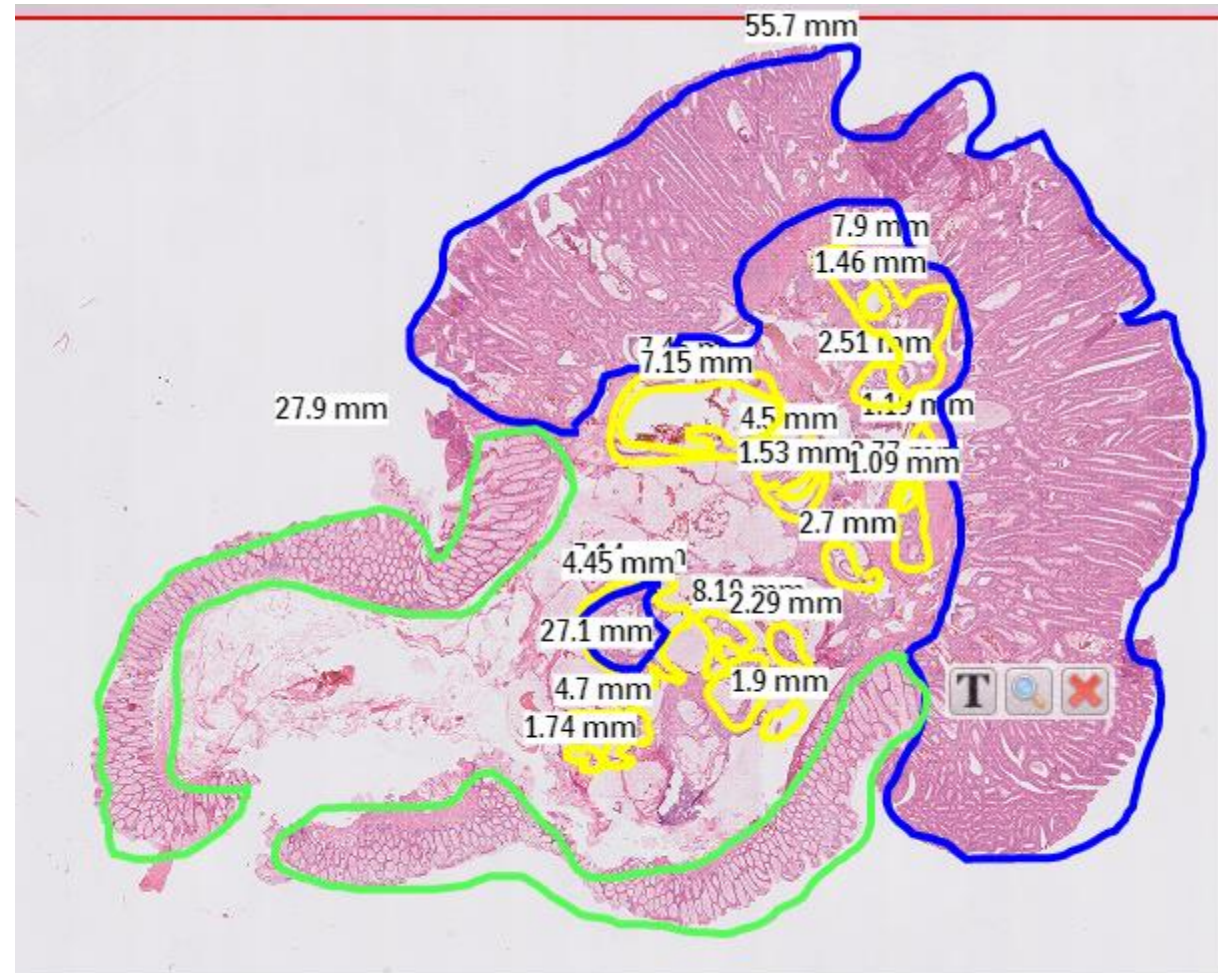

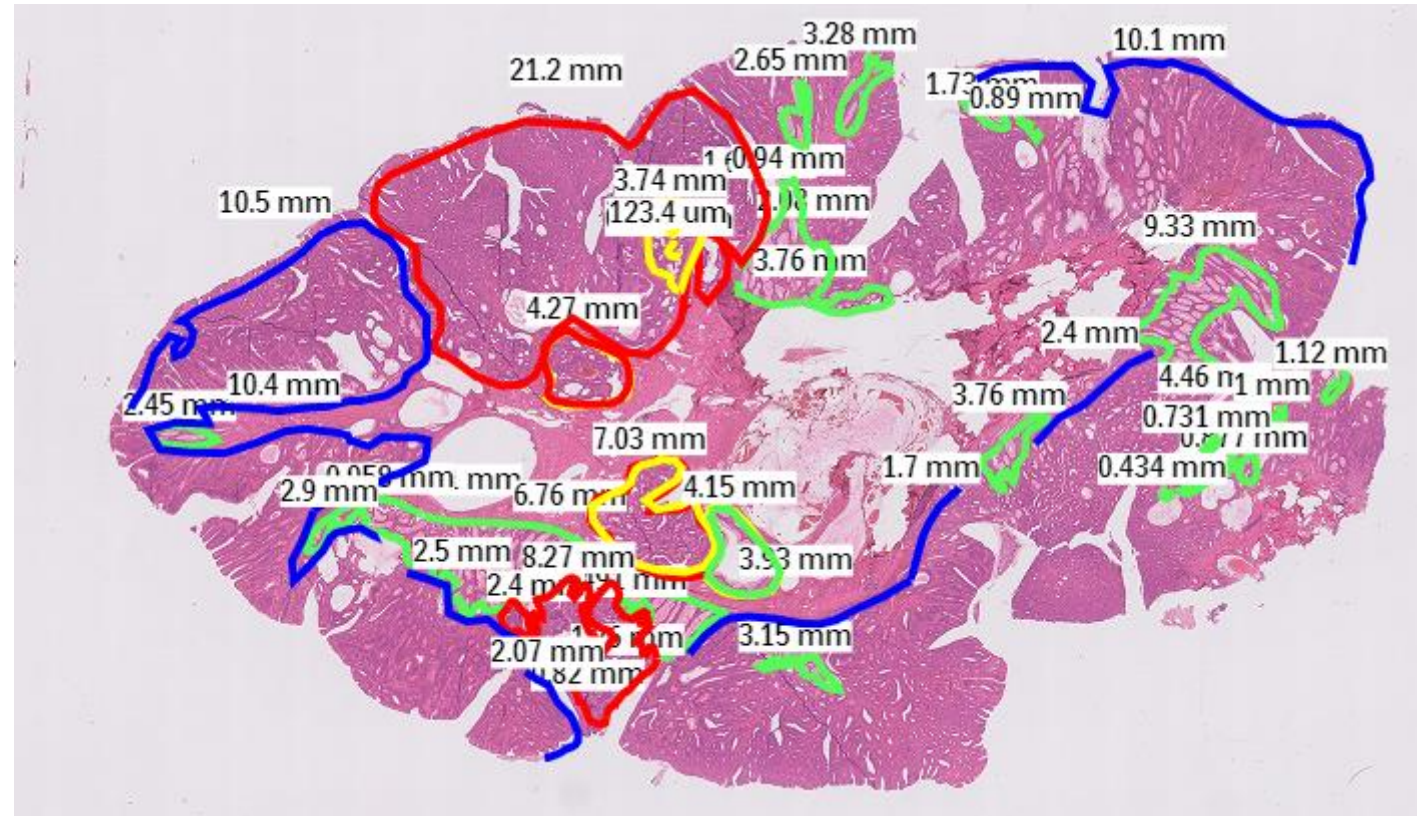



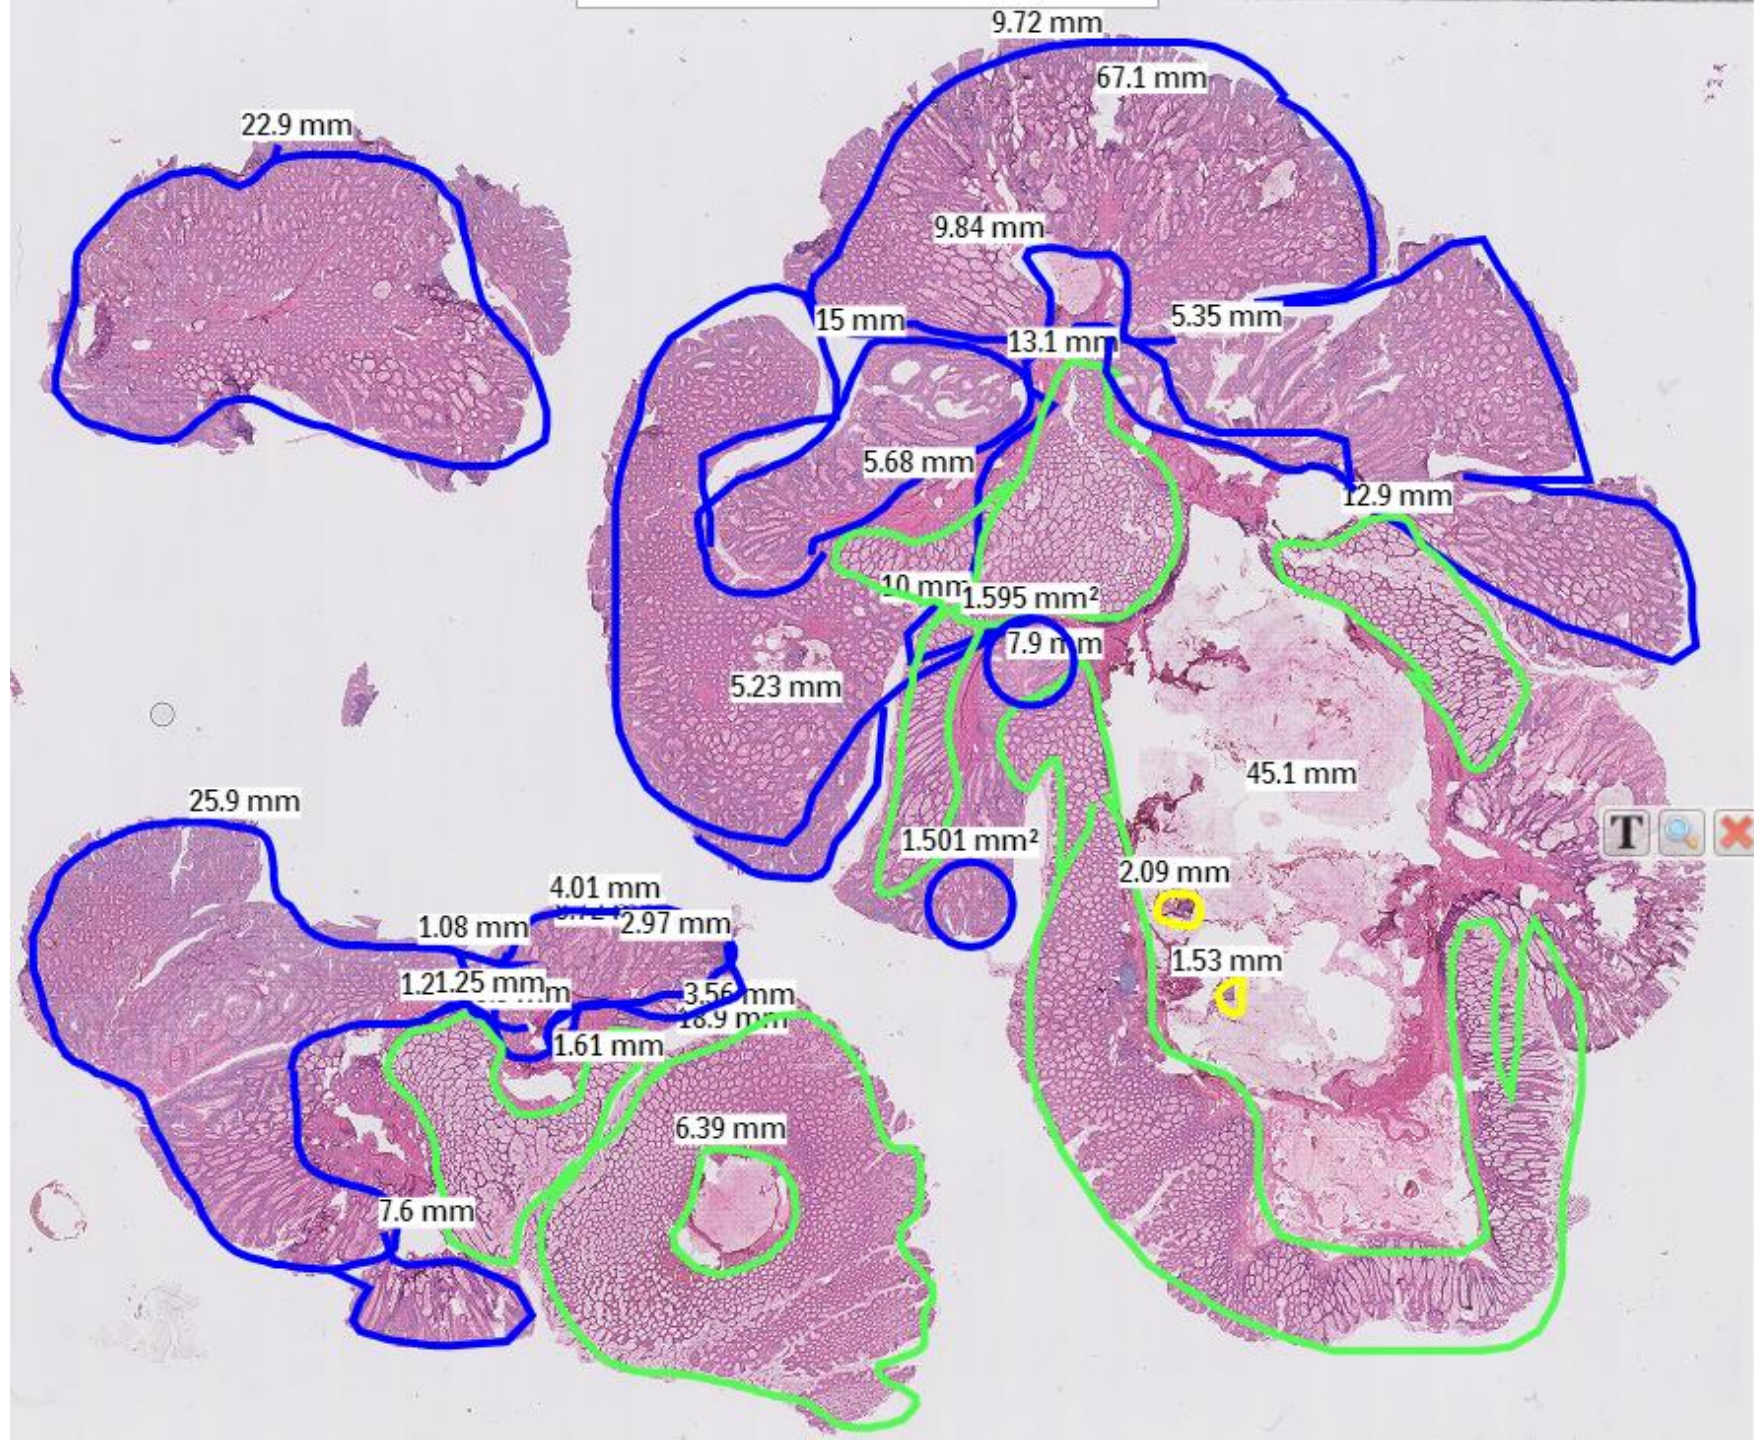



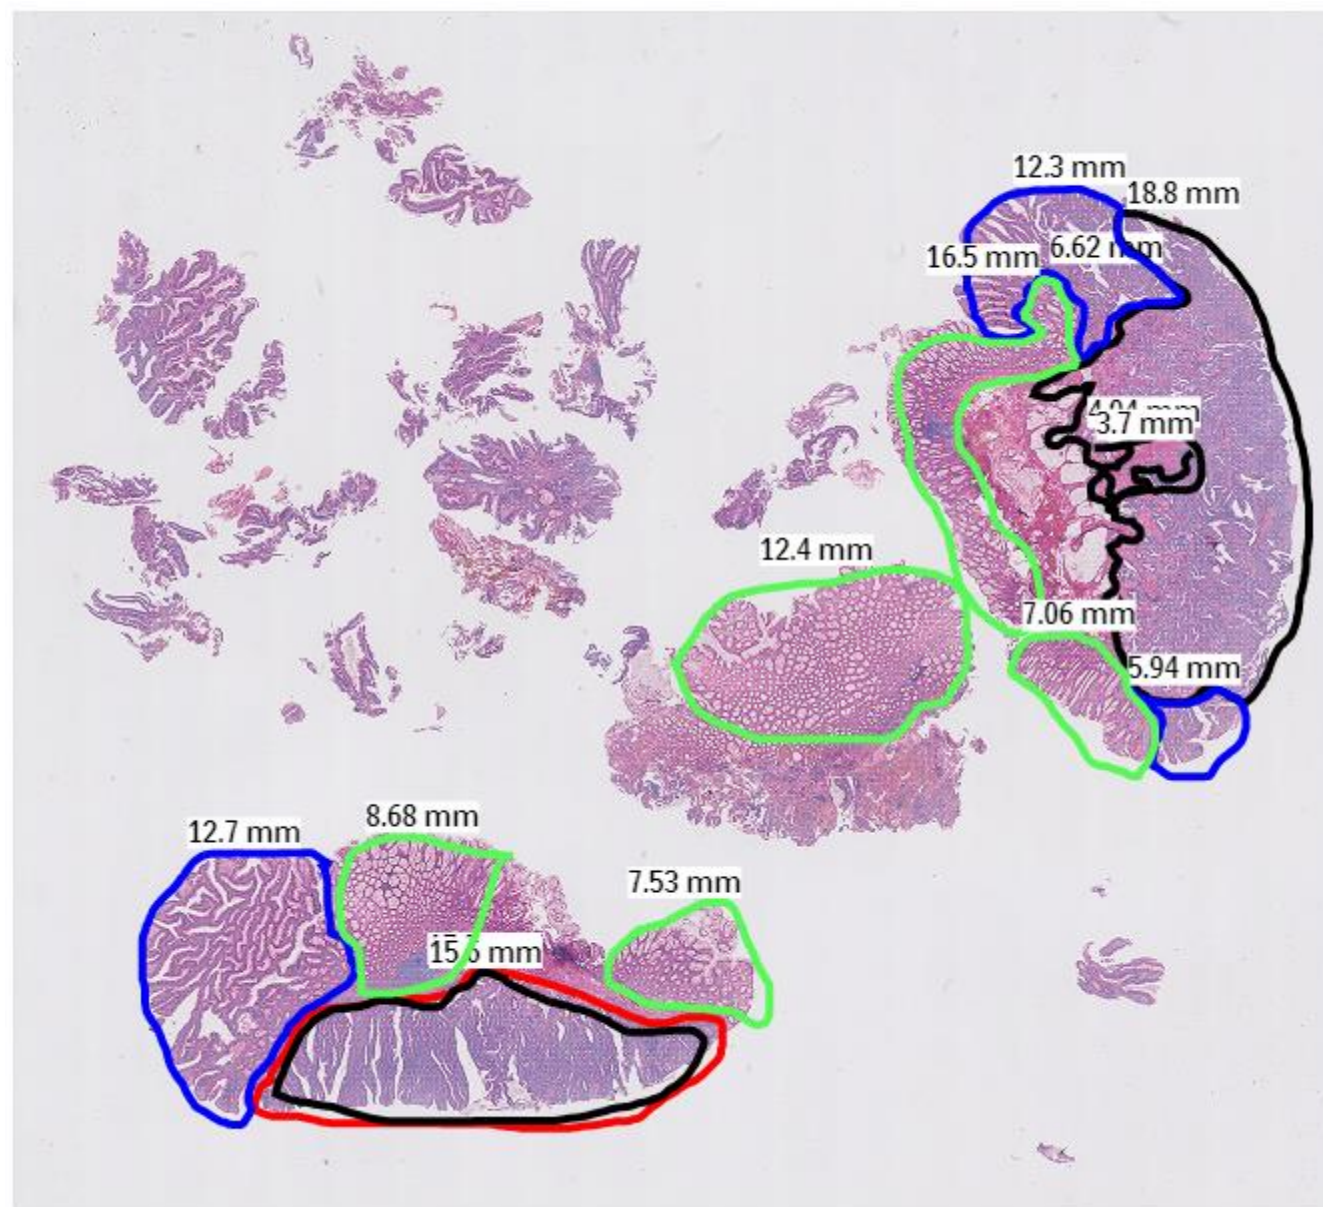

Supplement: s1 [file s1]
