# Supplementary material for: High-Mannose N-Glycans as Malignant Progression Markers in Early-Stage Colorectal Cancer
Source: MDPI journal article supplement (doi:10.3390/cancers14061552), 2022-03-18
Supplement: s1 [file s1]

# High-Mannose N-Glycans as Malignant Progression Markers in Early-Stage Colorectal Cancer

Fanny Boyaval <sup>1,2</sup>, Hans Dalebout <sup>2</sup>, René Van Zeijl <sup>2</sup>, Wenjun Wang <sup>2</sup>, Arantza Fariña-Sarasqueta <sup>3</sup>, Guinevere S. M. Lageveen-Kammeijer <sup>2</sup>, Jurjen J. Boonstra <sup>4</sup>, Liam A. McDonnell <sup>5</sup>, Manfred Wuhrer <sup>2</sup>, Hans Morreau <sup>1,\*</sup> and Bram Heijs <sup>2,\*</sup>

<sup>1</sup> Department of Pathology, Leiden University Medical Center, Albinusdreef, 2333 ZA Leiden, The Netherlands; f.f.m.boyaval@lumc.nl

<sup>2</sup> Center for Proteomics & Metabolomics, Leiden University Medical Center, Albinusdreef, 2333 ZA Leiden, The Netherlands; h.dalebout@lumc.nl (H.D.); r.j.m.van\_zeijl@lumc.nl (R.V.Z.); w.wang@lumc.nl (W.W.); g.s.m.kammeijer@lumc.nl (G.S.M.L.-K.); m.wuhrer@lumc.nl (M.W.)

<sup>3</sup> Department of Pathology, Cancer Center Amsterdam, Amsterdam University Medical Centers, University of Amsterdam, Meibergdreef 9, 1105 AZ Amsterdam, The Netherlands; a.farina@amsterdamumc.nl

<sup>4</sup> Department of Gastroenterology and Hepatology, Leiden University Medical Centre, 2300 RC Leiden, The Netherlands; j.j.boonstra@lumc.nl

<sup>5</sup> Fondazione Pisana per la Scienza ONLUS, Via Ferruccio Giovannini, 56017 San Giuliano Terme, Italy; l.a.mcdonnell@outlook.com

\* Correspondence: j.morreau@lumc.nl (H.M.); b.p.a.m.heijs@lumc.nl (B.H.)

## Supplementary Figure S1:

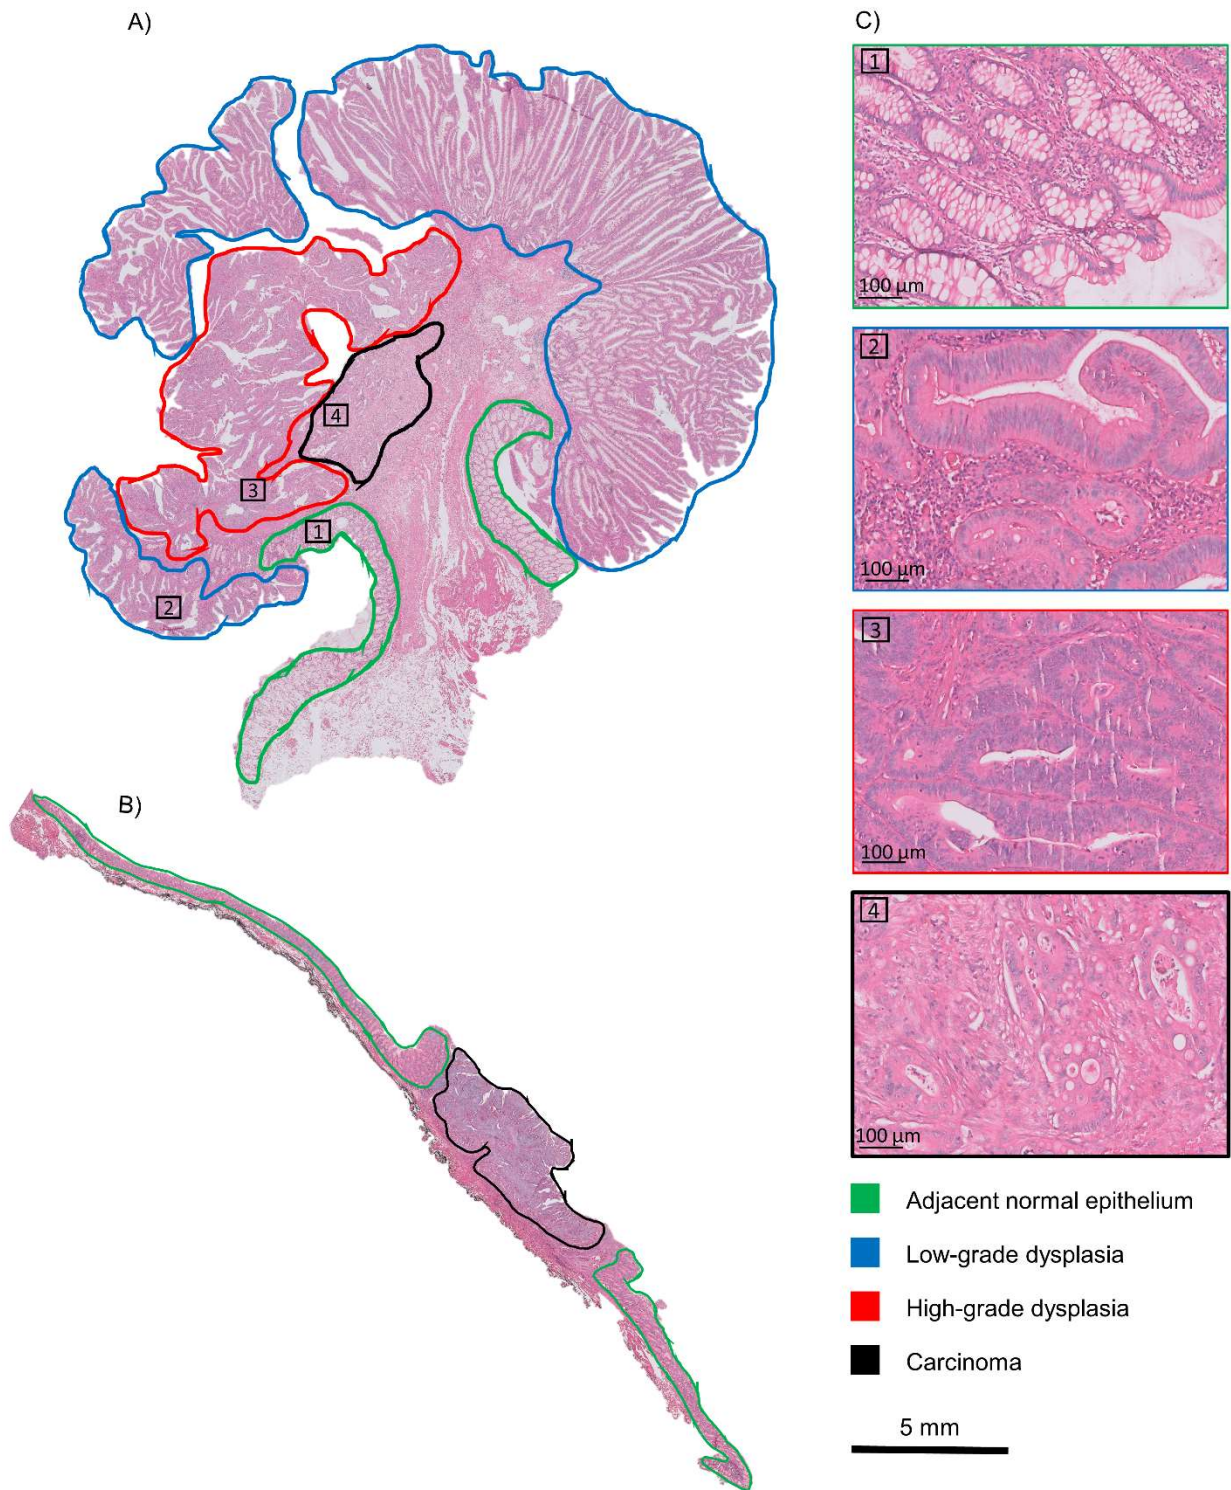

**Figure S1. Annotated H&E stained CRC tissues. (A) & (B)** Examples of post-MSI H&E stained human pT1 CRC tissues with annotations of morphological regions of interest. **(C)** Zoomed images (20x magnification) of different morphological areas annotated in the tissue (A).

## Supplementary Figure S2:

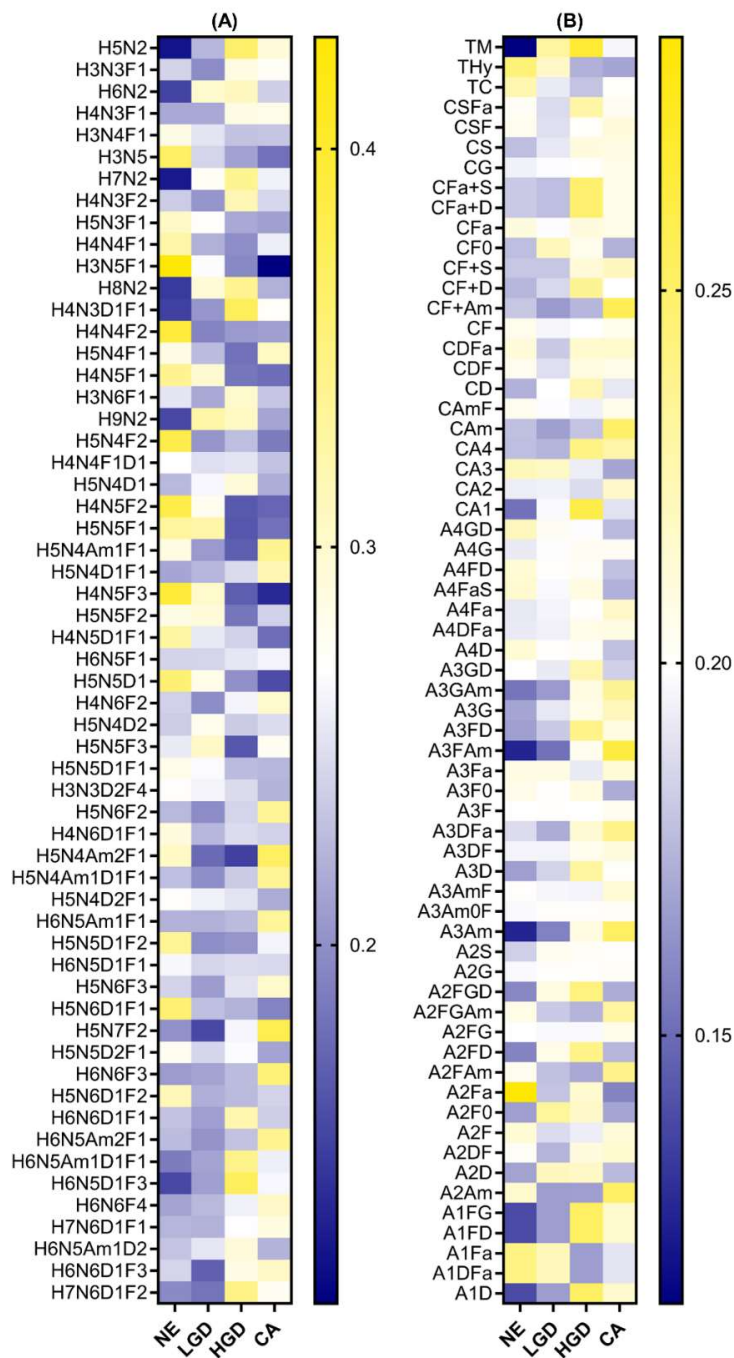

**Figure S2. Relative changes of glycans and derived traits in early CRC development.** Heatmap of the relative abundances of (A) individual *N*-glycan and (B) derived traits. The relative intensities have been averaged per morphology and scaled by the sum of each row for better visualization. NE = adjacent normal epithelium, LGD = low-grade dysplasia, HGD = high-grade dysplasia, CA = carcinoma. H: hexose, N: *N*-acetyl hexosamine, Am:  $\alpha$ 2,3-linked *N*-acetyl neuraminic acid, D:  $\alpha$ 2,6-linked *N*-acetyl neuraminic acid F: fucose.



### Supplementary Figure S3:

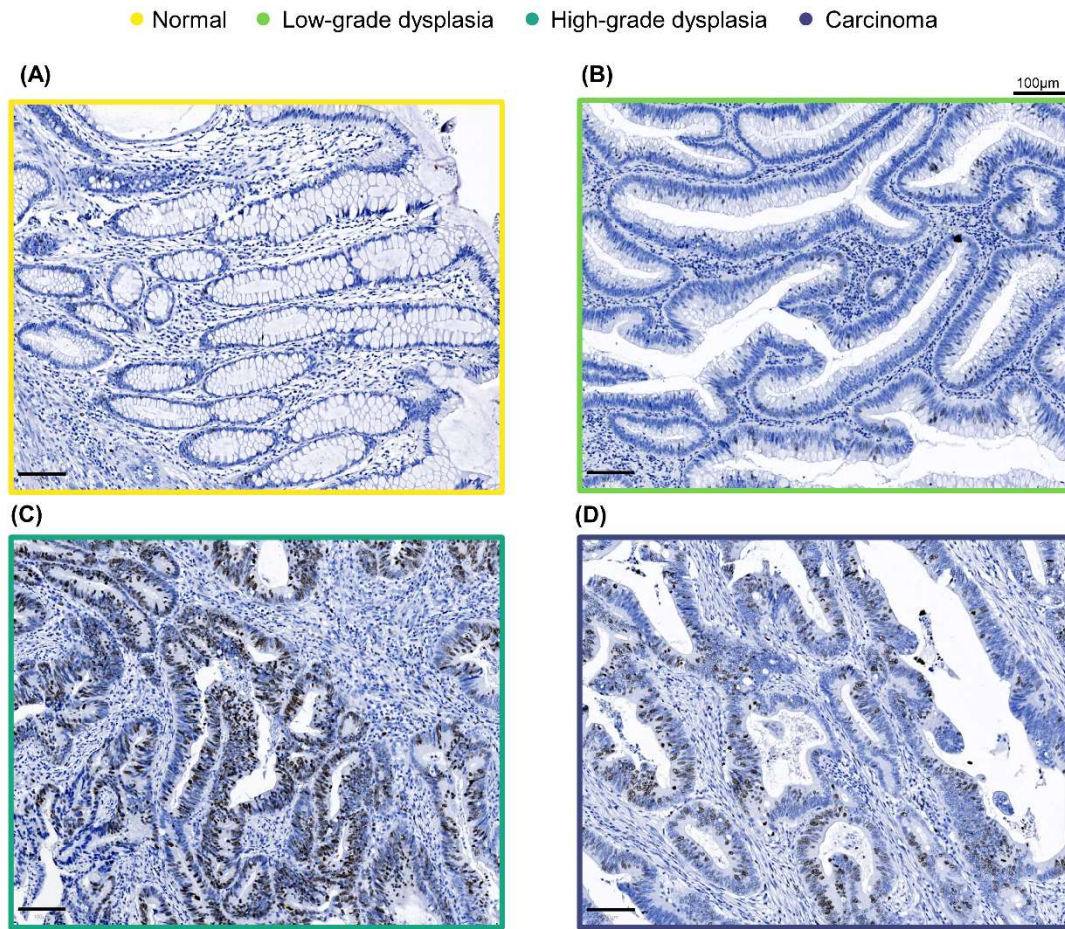

**Figure S3. Ki-67 staining in different morphological stages of CRC progression.** Immunohistochemistry of Ki-67 in selected regions of (A) normal adjacent epithelium (NE), (B) low-grade dysplasia (LGD), (C) high-grade dysplasia (HGD) and (D) carcinoma (CA).

## Supplementary Figure S4:

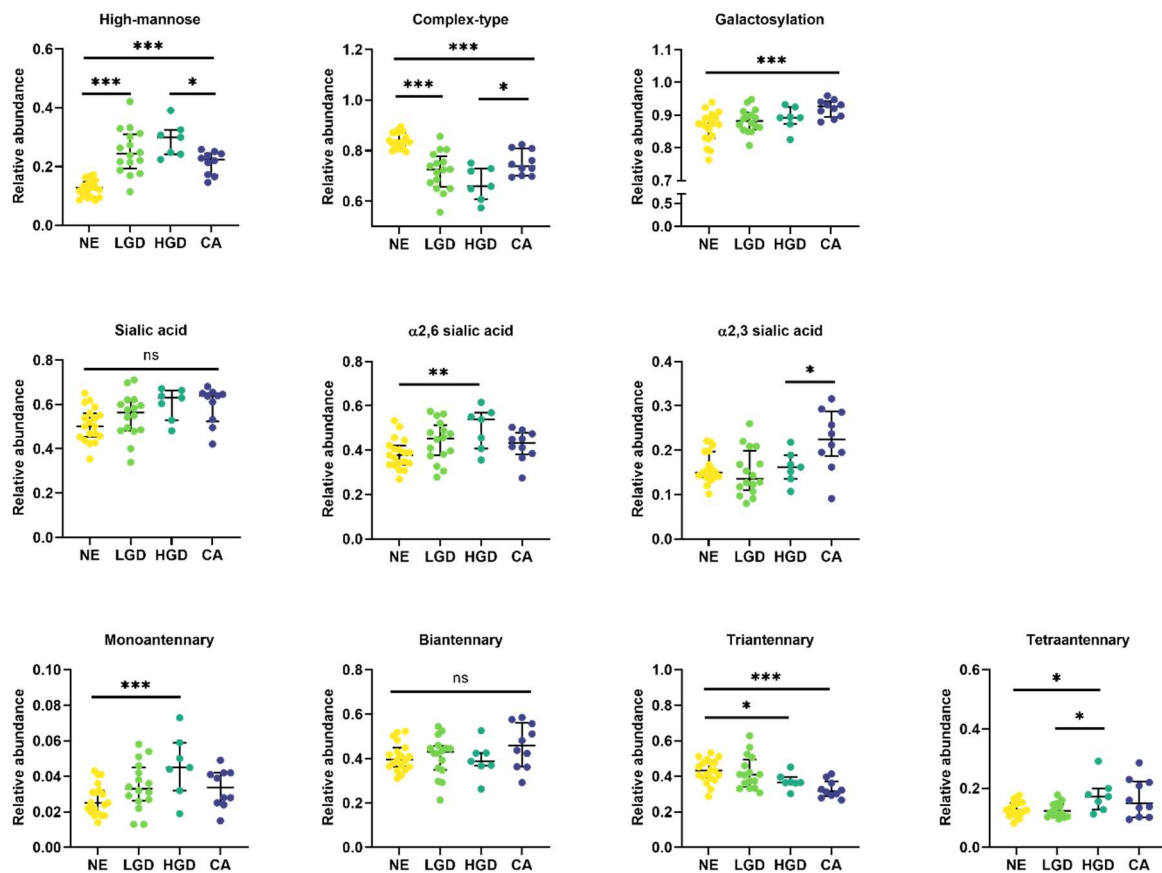

**Figure S4. Glycomic changes between early stages CRC morphologies.** Scatter plots of selected derived traits representing the median with interquartile range of the different morphologies per patient. NE = adjacent normal epithelium, LGD = low-grade dysplasia, HGD = high-grade dysplasia, CA = carcinoma. \* = p-value  $\leq 0.05$ , \*\* = p-value  $\leq 0.01$ , \*\*\* = p-value  $\leq 0.001$ , ns = not significant.

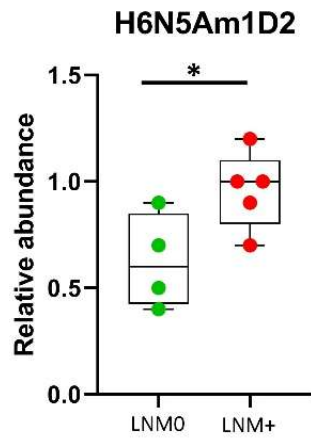

**Figure S5. Glycan change between lymph node metastasis (LNM) status.** Scatter plots of the glycan H6N5Am1D2 representing the median with interquartile range of LNM negative (LNM0) and positive (LNM+) patients. \* = p-value  $\leq 0.05$
