# Supplementary material for: High-Mannose N-Glycans as Malignant Progression Markers in Early-Stage Colorectal Cancer
Source: Cancers (Basel). 2022 Mar 18;14(6):1552. doi: 10.3390/cancers14061552 (PMC8945895; doi:10.3390/cancers14061552)
Supplement: Supplementary file 1 [file cancers-14-01552-s001.zip › Supplementary-table_20220210.xlsx]

## Sheet: S1_Derived-Trait-Calculation
Table S1. Derived trait calculation and explanation
Derived trait	Description	Calculation
T	Total of all glycans (TM+Thy+TC)	T = ( H5N2 + H3N3F1 + H6N2 + H4N3F1 + H3N4F1 + H3N5 + H7N2 + H4N3F2 + H5N3F1 + H4N4F1 + H3N5F1 + H8N2 + H4N3D1F1 + H4N4F2 + H5N4F1 + H4N5F1 + H3N6F1 + H9N2 + H5N4F2 + H4N4F1D1 + H5N4D1 + H4N5F2 + H5N5F1 + H5N4Am1F1 + H5N4D1F1 + H4N5F3 + H5N5F2 + H4N5D1F1 + H6N5F1 + H5N5D1 + H4N6F2 + H5N4D2 + H5N5F3 + H5N5D1F1 + H3N3D2F4 + H5N6F2 + H4N6D1F1 + H5N4Am2F1 + H5N4Am1D1F1 + H5N4D2F1 + H6N5Am1F1 + H5N5D1…
TM	Total of high-mannose species	TM = ( H5N2 + H6N2 + H7N2 + H8N2 + H9N2 ) / ( H5N2 + H3N3F1 + H6N2 + H4N3F1 + H3N4F1 + H3N5 + H7N2 + H4N3F2 + H5N3F1 + H4N4F1 + H3N5F1 + H8N2 + H4N3D1F1 + H4N4F2 + H5N4F1 + H4N5F1 + H3N6F1 + H9N2 + H5N4F2 + H4N4F1D1 + H5N4D1 + H4N5F2 + H5N5F1 + H5N4Am1F1 + H5N4D1F1 + H4N5F3 + H5N5F2 + H4N5D1F1 + H6N5F1 + H5N5D1 + H4N6F2 + H5N4D2 + H5N5F3 + H5N5D1F1 + H3N3D2F4 + H5N6F2 + H4N6D1F1 + H5N4Am2F1 + H5N…
THy	Total of hybride species	THy = ( H5N3F1 ) / ( H5N2 + H3N3F1 + H6N2 + H4N3F1 + H3N4F1 + H3N5 + H7N2 + H4N3F2 + H5N3F1 + H4N4F1 + H3N5F1 + H8N2 + H4N3D1F1 + H4N4F2 + H5N4F1 + H4N5F1 + H3N6F1 + H9N2 + H5N4F2 + H4N4F1D1 + H5N4D1 + H4N5F2 + H5N5F1 + H5N4Am1F1 + H5N4D1F1 + H4N5F3 + H5N5F2 + H4N5D1F1 + H6N5F1 + H5N5D1 + H4N6F2 + H5N4D2 + H5N5F3 + H5N5D1F1 + H3N3D2F4 + H5N6F2 + H4N6D1F1 + H5N4Am2F1 + H5N4Am1D1F1 + H5N4D2F1 + H6N…
TC	Total of complex-type species	TC = ( H3N4F1 + H3N5 + H4N4F1 + H3N5F1 + H4N3D1F1 + H4N4F2 + H5N4F1 + H4N5F1 + H3N6F1 + H5N4F2 + H4N4F1D1 + H5N4D1 + H4N5F2 + H5N5F1 + H5N4Am1F1 + H5N4D1F1 + H4N5F3 + H5N5F2 + H4N5D1F1 + H6N5F1 + H5N5D1 + H4N6F2 + H5N4D2 + H5N5F3 + H5N5D1F1 + H3N3D2F4 + H5N6F2 + H4N6D1F1 + H5N4Am2F1 + H5N4Am1D1F1 + H5N4D2F1 + H6N5Am1F1 + H5N5D1F2 + H6N5D1F1 + H5N6F3 + H5N6D1F1 + H5N7F2 + H5N5D2F1 + H6N6F3 + H5N6D…
MHy	High-mannose / hybride type species	MHy = ( H5N2 + H6N2 + H7N2 + H8N2 + H9N2 ) / ( H5N3F1 )
MM	Average number of mannoses on high mannose type glycans	MM = ( 5 * ( H5N2 ) + 6 * ( H6N2 ) + 7 * ( H7N2 ) + 8 * ( H8N2 ) + 9 * ( H9N2 ) + 10 * (0) ) / ( H5N2 + H6N2 + H7N2 + H8N2 + H9N2 )
CA1	Monoantennary species within complex-type	CA1 = ( H4N3D1F1 + H3N3D2F4 ) / ( H3N4F1 + H3N5 + H4N4F1 + H3N5F1 + H4N3D1F1 + H4N4F2 + H5N4F1 + H4N5F1 + H3N6F1 + H5N4F2 + H4N4F1D1 + H5N4D1 + H4N5F2 + H5N5F1 + H5N4Am1F1 + H5N4D1F1 + H4N5F3 + H5N5F2 + H4N5D1F1 + H6N5F1 + H5N5D1 + H4N6F2 + H5N4D2 + H5N5F3 + H5N5D1F1 + H3N3D2F4 + H5N6F2 + H4N6D1F1 + H5N4Am2F1 + H5N4Am1D1F1 + H5N4D2F1 + H6N5Am1F1 + H5N5D1F2 + H6N5D1F1 + H5N6F3 + H5N6D1F1 + H5N7F2 …
CA2	Diantennary species within complex-type	CA2 = ( H3N4F1 + H4N4F1 + H4N4F2 + H5N4F1 + H5N4F2 + H4N4F1D1 + H5N4D1 + H5N4Am1F1 + H5N4D1F1 + H5N4D2 + H5N4Am2F1 + H5N4Am1D1F1 + H5N4D2F1 ) / ( H3N4F1 + H3N5 + H4N4F1 + H3N5F1 + H4N3D1F1 + H4N4F2 + H5N4F1 + H4N5F1 + H3N6F1 + H5N4F2 + H4N4F1D1 + H5N4D1 + H4N5F2 + H5N5F1 + H5N4Am1F1 + H5N4D1F1 + H4N5F3 + H5N5F2 + H4N5D1F1 + H6N5F1 + H5N5D1 + H4N6F2 + H5N4D2 + H5N5F3 + H5N5D1F1 + H3N3D2F4 + H5N6F2…
CA3	Triantennary species within complex-type	CA3 = ( H3N5 + H3N5F1 + H4N5F1 + H4N5F2 + H5N5F1 + H4N5F3 + H5N5F2 + H4N5D1F1 + H6N5F1 + H5N5D1 + H5N5F3 + H5N5D1F1 + H6N5Am1F1 + H5N5D1F2 + H6N5D1F1 + H5N5D2F1 + H6N5Am2F1 + H6N5Am1D1F1 + H6N5D1F3 + H6N5Am1D2 ) / ( H3N4F1 + H3N5 + H4N4F1 + H3N5F1 + H4N3D1F1 + H4N4F2 + H5N4F1 + H4N5F1 + H3N6F1 + H5N4F2 + H4N4F1D1 + H5N4D1 + H4N5F2 + H5N5F1 + H5N4Am1F1 + H5N4D1F1 + H4N5F3 + H5N5F2 + H4N5D1F1 + H6N…
CA4	Tetraantennary species within complex-type	CA4 = ( H3N6F1 + H4N6F2 + H5N6F2 + H4N6D1F1 + H5N6F3 + H5N6D1F1 + H6N6F3 + H5N6D1F2 + H6N6D1F1 + H6N6F4 + H7N6D1F1 + H6N6D1F3 + H7N6D1F2 ) / ( H3N4F1 + H3N5 + H4N4F1 + H3N5F1 + H4N3D1F1 + H4N4F2 + H5N4F1 + H4N5F1 + H3N6F1 + H5N4F2 + H4N4F1D1 + H5N4D1 + H4N5F2 + H5N5F1 + H5N4Am1F1 + H5N4D1F1 + H4N5F3 + H5N5F2 + H4N5D1F1 + H6N5F1 + H5N5D1 + H4N6F2 + H5N4D2 + H5N5F3 + H5N5D1F1 + H3N3D2F4 + H5N6F2 + …
CF0	Non-fucosylated species within complex-type	CF0 = ( H3N5 + H5N4D1 + H5N5D1 + H5N4D2 + H6N5Am1D2 ) / ( H3N4F1 + H3N5 + H4N4F1 + H3N5F1 + H4N3D1F1 + H4N4F2 + H5N4F1 + H4N5F1 + H3N6F1 + H5N4F2 + H4N4F1D1 + H5N4D1 + H4N5F2 + H5N5F1 + H5N4Am1F1 + H5N4D1F1 + H4N5F3 + H5N5F2 + H4N5D1F1 + H6N5F1 + H5N5D1 + H4N6F2 + H5N4D2 + H5N5F3 + H5N5D1F1 + H3N3D2F4 + H5N6F2 + H4N6D1F1 + H5N4Am2F1 + H5N4Am1D1F1 + H5N4D2F1 + H6N5Am1F1 + H5N5D1F2 + H6N5D1F1 + H5N…
CF	Fucosylated species within complex-type	CF = ( H3N4F1 + H4N4F1 + H3N5F1 + H4N3D1F1 + H4N4F2 + H5N4F1 + H4N5F1 + H3N6F1 + H5N4F2 + H4N4F1D1 + H4N5F2 + H5N5F1 + H5N4Am1F1 + H5N4D1F1 + H4N5F3 + H5N5F2 + H4N5D1F1 + H6N5F1 + H4N6F2 + H5N5F3 + H5N5D1F1 + H3N3D2F4 + H5N6F2 + H4N6D1F1 + H5N4Am2F1 + H5N4Am1D1F1 + H5N4D2F1 + H6N5Am1F1 + H5N5D1F2 + H6N5D1F1 + H5N6F3 + H5N6D1F1 + H5N7F2 + H5N5D2F1 + H6N6F3 + H5N6D1F2 + H6N6D1F1 + H6N5Am2F1 + H6N5A…
CFa	Multiple (n+1)fucosylated species within complex-type	CFa = ( H4N4F2 + H5N4F2 + H4N5F2 + H4N5F3 + H5N5F2 + H4N6F2 + H5N5F3 + H3N3D2F4 + H5N6F2 + H5N5D1F2 + H5N6F3 + H5N7F2 + H6N6F3 + H5N6D1F2 + H6N5D1F3 + H6N6F4 + H6N6D1F3 + H7N6D1F2 ) / ( H3N4F1 + H3N5 + H4N4F1 + H3N5F1 + H4N3D1F1 + H4N4F2 + H5N4F1 + H4N5F1 + H3N6F1 + H5N4F2 + H4N4F1D1 + H5N4D1 + H4N5F2 + H5N5F1 + H5N4Am1F1 + H5N4D1F1 + H4N5F3 + H5N5F2 + H4N5D1F1 + H6N5F1 + H5N5D1 + H4N6F2 + H5N4D2…
CG	Galactosylated species within complex-type	CG = ( H4N4F1 + H4N3D1F1 + H4N4F2 + H5N4F1 + H4N5F1 + H5N4F2 + H4N4F1D1 + H5N4D1 + H4N5F2 + H5N5F1 + H5N4Am1F1 + H5N4D1F1 + H4N5F3 + H5N5F2 + H4N5D1F1 + H6N5F1 + H5N5D1 + H4N6F2 + H5N4D2 + H5N5F3 + H5N5D1F1 + H5N6F2 + H4N6D1F1 + H5N4Am2F1 + H5N4Am1D1F1 + H5N4D2F1 + H6N5Am1F1 + H5N5D1F2 + H6N5D1F1 + H5N6F3 + H5N6D1F1 + H5N7F2 + H5N5D2F1 + H6N6F3 + H5N6D1F2 + H6N6D1F1 + H6N5Am2F1 + H6N5Am1D1F1 + H6…
CS	Sialylated species within complex-type	CS = ( H4N3D1F1 + H4N4F1D1 + H5N4D1 + H5N4Am1F1 + H5N4D1F1 + H4N5D1F1 + H5N5D1 + H5N4D2 + H5N5D1F1 + H3N3D2F4 + H4N6D1F1 + H5N4Am2F1 + H5N4Am1D1F1 + H5N4D2F1 + H6N5Am1F1 + H5N5D1F2 + H6N5D1F1 + H5N6D1F1 + H5N5D2F1 + H5N6D1F2 + H6N6D1F1 + H6N5Am2F1 + H6N5Am1D1F1 + H6N5D1F3 + H7N6D1F1 + H6N5Am1D2 + H6N6D1F3 + H7N6D1F2 ) / ( H3N4F1 + H3N5 + H4N4F1 + H3N5F1 + H4N3D1F1 + H4N4F2 + H5N4F1 + H4N5F1 + H3N…
CAm	α2,3-sialic acid linked species within complex-type	CAm = ( H5N4Am1F1 + H5N4Am2F1 + H5N4Am1D1F1 + H6N5Am1F1 + H6N5Am2F1 + H6N5Am1D1F1 + H6N5Am1D2 ) / ( H3N4F1 + H3N5 + H4N4F1 + H3N5F1 + H4N3D1F1 + H4N4F2 + H5N4F1 + H4N5F1 + H3N6F1 + H5N4F2 + H4N4F1D1 + H5N4D1 + H4N5F2 + H5N5F1 + H5N4Am1F1 + H5N4D1F1 + H4N5F3 + H5N5F2 + H4N5D1F1 + H6N5F1 + H5N5D1 + H4N6F2 + H5N4D2 + H5N5F3 + H5N5D1F1 + H3N3D2F4 + H5N6F2 + H4N6D1F1 + H5N4Am2F1 + H5N4Am1D1F1 + H5N4D2…
CD	α2,6-sialic acid linked species within complex-type	CD = ( H4N3D1F1 + H4N4F1D1 + H5N4D1 + H5N4D1F1 + H4N5D1F1 + H5N5D1 + H5N4D2 + H5N5D1F1 + H3N3D2F4 + H4N6D1F1 + H5N4Am1D1F1 + H5N4D2F1 + H5N5D1F2 + H6N5D1F1 + H5N6D1F1 + H5N5D2F1 + H5N6D1F2 + H6N6D1F1 + H6N5Am1D1F1 + H6N5D1F3 + H7N6D1F1 + H6N5Am1D2 + H6N6D1F3 + H7N6D1F2 ) / ( H3N4F1 + H3N5 + H4N4F1 + H3N5F1 + H4N3D1F1 + H4N4F2 + H5N4F1 + H4N5F1 + H3N6F1 + H5N4F2 + H4N4F1D1 + H5N4D1 + H4N5F2 + H5N5…
CF+S	Sialylated and fucosylated species within complex-type	CF+S = ( H4N3D1F1 + H4N4F1D1 + H5N4Am1F1 + H5N4D1F1 + H4N5D1F1 + H5N5D1F1 + H3N3D2F4 + H4N6D1F1 + H5N4Am2F1 + H5N4Am1D1F1 + H5N4D2F1 + H6N5Am1F1 + H5N5D1F2 + H6N5D1F1 + H5N6D1F1 + H5N5D2F1 + H5N6D1F2 + H6N6D1F1 + H6N5Am2F1 + H6N5Am1D1F1 + H6N5D1F3 + H7N6D1F1 + H6N6D1F3 + H7N6D1F2 ) / ( H3N4F1 + H3N5 + H4N4F1 + H3N5F1 + H4N3D1F1 + H4N4F2 + H5N4F1 + H4N5F1 + H3N6F1 + H5N4F2 + H4N4F1D1 + H5N4D1 + H4…
CFa+S	Sialylated and multiple fucosylated species within complex-type	CFa+S = ( H3N3D2F4 + H5N5D1F2 + H5N6D1F2 + H6N5D1F3 + H6N6D1F3 + H7N6D1F2 ) / ( H3N4F1 + H3N5 + H4N4F1 + H3N5F1 + H4N3D1F1 + H4N4F2 + H5N4F1 + H4N5F1 + H3N6F1 + H5N4F2 + H4N4F1D1 + H5N4D1 + H4N5F2 + H5N5F1 + H5N4Am1F1 + H5N4D1F1 + H4N5F3 + H5N5F2 + H4N5D1F1 + H6N5F1 + H5N5D1 + H4N6F2 + H5N4D2 + H5N5F3 + H5N5D1F1 + H3N3D2F4 + H5N6F2 + H4N6D1F1 + H5N4Am2F1 + H5N4Am1D1F1 + H5N4D2F1 + H6N5Am1F1 + H5N…
CF+D	α2,6-sialic acid linked and fucosylated species within complex-type	CF+D = ( H4N3D1F1 + H4N4F1D1 + H5N4D1F1 + H4N5D1F1 + H5N5D1F1 + H3N3D2F4 + H4N6D1F1 + H5N4Am1D1F1 + H5N4D2F1 + H5N5D1F2 + H6N5D1F1 + H5N6D1F1 + H5N5D2F1 + H5N6D1F2 + H6N6D1F1 + H6N5Am1D1F1 + H6N5D1F3 + H7N6D1F1 + H6N6D1F3 + H7N6D1F2 ) / ( H3N4F1 + H3N5 + H4N4F1 + H3N5F1 + H4N3D1F1 + H4N4F2 + H5N4F1 + H4N5F1 + H3N6F1 + H5N4F2 + H4N4F1D1 + H5N4D1 + H4N5F2 + H5N5F1 + H5N4Am1F1 + H5N4D1F1 + H4N5F3 + …
CFa+D	α2,6-sialic acid linked and multiple fucosylated species within complex-type	CFa+D = ( H3N3D2F4 + H5N5D1F2 + H5N6D1F2 + H6N5D1F3 + H6N6D1F3 + H7N6D1F2 ) / ( H3N4F1 + H3N5 + H4N4F1 + H3N5F1 + H4N3D1F1 + H4N4F2 + H5N4F1 + H4N5F1 + H3N6F1 + H5N4F2 + H4N4F1D1 + H5N4D1 + H4N5F2 + H5N5F1 + H5N4Am1F1 + H5N4D1F1 + H4N5F3 + H5N5F2 + H4N5D1F1 + H6N5F1 + H5N5D1 + H4N6F2 + H5N4D2 + H5N5F3 + H5N5D1F1 + H3N3D2F4 + H5N6F2 + H4N6D1F1 + H5N4Am2F1 + H5N4Am1D1F1 + H5N4D2F1 + H6N5Am1F1 + H5N…
CF+Am	α2,3-sialic acid linked and fucosylated species within complex-type	CF+Am = ( H5N4Am1F1 + H5N4Am2F1 + H5N4Am1D1F1 + H6N5Am1F1 + H6N5Am2F1 + H6N5Am1D1F1 ) / ( H3N4F1 + H3N5 + H4N4F1 + H3N5F1 + H4N3D1F1 + H4N4F2 + H5N4F1 + H4N5F1 + H3N6F1 + H5N4F2 + H4N4F1D1 + H5N4D1 + H4N5F2 + H5N5F1 + H5N4Am1F1 + H5N4D1F1 + H4N5F3 + H5N5F2 + H4N5D1F1 + H6N5F1 + H5N5D1 + H4N6F2 + H5N4D2 + H5N5F3 + H5N5D1F1 + H3N3D2F4 + H5N6F2 + H4N6D1F1 + H5N4Am2F1 + H5N4Am1D1F1 + H5N4D2F1 + H6N5A…
A2F0		A2F0 = ( H5N4D1 + H5N4D2 ) / ( H3N4F1 + H4N4F1 + H4N4F2 + H5N4F1 + H5N4F2 + H4N4F1D1 + H5N4D1 + H5N4Am1F1 + H5N4D1F1 + H5N4D2 + H5N4Am2F1 + H5N4Am1D1F1 + H5N4D2F1 )
A3F0		A3F0 = ( H3N5 + H5N5D1 + H6N5Am1D2 ) / ( H3N5 + H3N5F1 + H4N5F1 + H4N5F2 + H5N5F1 + H4N5F3 + H5N5F2 + H4N5D1F1 + H6N5F1 + H5N5D1 + H5N5F3 + H5N5D1F1 + H6N5Am1F1 + H5N5D1F2 + H6N5D1F1 + H5N5D2F1 + H6N5Am2F1 + H6N5Am1D1F1 + H6N5D1F3 + H6N5Am1D2 )
A1F	Fucosylated monoantennary within monoantennary	A1F = ( H4N3D1F1 + H3N3D2F4 ) / ( H4N3D1F1 + H3N3D2F4 )
A2F		A2F = ( H3N4F1 + H4N4F1 + H4N4F2 + H5N4F1 + H5N4F2 + H4N4F1D1 + H5N4Am1F1 + H5N4D1F1 + H5N4Am2F1 + H5N4Am1D1F1 + H5N4D2F1 ) / ( H3N4F1 + H4N4F1 + H4N4F2 + H5N4F1 + H5N4F2 + H4N4F1D1 + H5N4D1 + H5N4Am1F1 + H5N4D1F1 + H5N4D2 + H5N4Am2F1 + H5N4Am1D1F1 + H5N4D2F1 )
A3F		A3F = ( H3N5F1 + H4N5F1 + H4N5F2 + H5N5F1 + H4N5F3 + H5N5F2 + H4N5D1F1 + H6N5F1 + H5N5F3 + H5N5D1F1 + H6N5Am1F1 + H5N5D1F2 + H6N5D1F1 + H5N5D2F1 + H6N5Am2F1 + H6N5Am1D1F1 + H6N5D1F3 ) / ( H3N5 + H3N5F1 + H4N5F1 + H4N5F2 + H5N5F1 + H4N5F3 + H5N5F2 + H4N5D1F1 + H6N5F1 + H5N5D1 + H5N5F3 + H5N5D1F1 + H6N5Am1F1 + H5N5D1F2 + H6N5D1F1 + H5N5D2F1 + H6N5Am2F1 + H6N5Am1D1F1 + H6N5D1F3 + H6N5Am1D2 )
A4F		A4F = ( H3N6F1 + H4N6F2 + H5N6F2 + H4N6D1F1 + H5N6F3 + H5N6D1F1 + H6N6F3 + H5N6D1F2 + H6N6D1F1 + H6N6F4 + H7N6D1F1 + H6N6D1F3 + H7N6D1F2 ) / ( H3N6F1 + H4N6F2 + H5N6F2 + H4N6D1F1 + H5N6F3 + H5N6D1F1 + H6N6F3 + H5N6D1F2 + H6N6D1F1 + H6N6F4 + H7N6D1F1 + H6N6D1F3 + H7N6D1F2 )
A2Fa		A2Fa = ( H4N4F2 + H5N4F2 ) / ( H3N4F1 + H4N4F1 + H4N4F2 + H5N4F1 + H5N4F2 + H4N4F1D1 + H5N4D1 + H5N4Am1F1 + H5N4D1F1 + H5N4D2 + H5N4Am2F1 + H5N4Am1D1F1 + H5N4D2F1 )
A3Fa		A3Fa = ( H4N5F2 + H4N5F3 + H5N5F2 + H5N5F3 + H5N5D1F2 + H6N5D1F3 ) / ( H3N5 + H3N5F1 + H4N5F1 + H4N5F2 + H5N5F1 + H4N5F3 + H5N5F2 + H4N5D1F1 + H6N5F1 + H5N5D1 + H5N5F3 + H5N5D1F1 + H6N5Am1F1 + H5N5D1F2 + H6N5D1F1 + H5N5D2F1 + H6N5Am2F1 + H6N5Am1D1F1 + H6N5D1F3 + H6N5Am1D2 )
A4Fa		A4Fa = ( H4N6F2 + H5N6F2 + H5N6F3 + H6N6F3 + H5N6D1F2 + H6N6F4 + H6N6D1F3 + H7N6D1F2 ) / ( H3N6F1 + H4N6F2 + H5N6F2 + H4N6D1F1 + H5N6F3 + H5N6D1F1 + H6N6F3 + H5N6D1F2 + H6N6D1F1 + H6N6F4 + H7N6D1F1 + H6N6D1F3 + H7N6D1F2 )
A2S0F	Fucosylated and non-sialylated species within non-sialylated Diantennary	A2S0F = ( H3N4F1 + H4N4F1 + H4N4F2 + H5N4F1 + H5N4F2 ) / ( H3N4F1 + H4N4F1 + H4N4F2 + H5N4F1 + H5N4F2 )
A3S0F		A3S0F = ( H3N5F1 + H4N5F1 + H4N5F2 + H5N5F1 + H4N5F3 + H5N5F2 + H6N5F1 + H5N5F3 ) / ( H3N5 + H3N5F1 + H4N5F1 + H4N5F2 + H5N5F1 + H4N5F3 + H5N5F2 + H6N5F1 + H5N5F3 )
A4S0F		A4S0F = ( H3N6F1 + H4N6F2 + H5N6F2 + H5N6F3 + H6N6F3 + H6N6F4 ) / ( H3N6F1 + H4N6F2 + H5N6F2 + H5N6F3 + H6N6F3 + H6N6F4 )
A1Am0F	Fucosylated and no α2,3-linked sialic acid species within monoantennay with no α2,3-linked sialic acid	A1Am0F = ( H4N3D1F1 + H3N3D2F4 ) / ( H4N3D1F1 + H3N3D2F4 )
A2Am0F		A2Am0F = ( H3N4F1 + H4N4F1 + H4N4F2 + H5N4F1 + H5N4F2 + H4N4F1D1 + H5N4D1F1 + H5N4D2F1 ) / ( H3N4F1 + H4N4F1 + H4N4F2 + H5N4F1 + H5N4F2 + H4N4F1D1 + H5N4D1 + H5N4D1F1 + H5N4D2 + H5N4D2F1 )
A3Am0F		A3Am0F = ( H3N5F1 + H4N5F1 + H4N5F2 + H5N5F1 + H4N5F3 + H5N5F2 + H4N5D1F1 + H6N5F1 + H5N5F3 + H5N5D1F1 + H5N5D1F2 + H6N5D1F1 + H5N5D2F1 + H6N5D1F3 ) / ( H3N5 + H3N5F1 + H4N5F1 + H4N5F2 + H5N5F1 + H4N5F3 + H5N5F2 + H4N5D1F1 + H6N5F1 + H5N5D1 + H5N5F3 + H5N5D1F1 + H5N5D1F2 + H6N5D1F1 + H5N5D2F1 + H6N5D1F3 )
A4Am0F		A4Am0F = ( H3N6F1 + H4N6F2 + H5N6F2 + H4N6D1F1 + H5N6F3 + H5N6D1F1 + H6N6F3 + H5N6D1F2 + H6N6D1F1 + H6N6F4 + H7N6D1F1 + H6N6D1F3 + H7N6D1F2 ) / ( H3N6F1 + H4N6F2 + H5N6F2 + H4N6D1F1 + H5N6F3 + H5N6D1F1 + H6N6F3 + H5N6D1F2 + H6N6D1F1 + H6N6F4 + H7N6D1F1 + H6N6D1F3 + H7N6D1F2 )
A2D0F		A2D0F = ( H3N4F1 + H4N4F1 + H4N4F2 + H5N4F1 + H5N4F2 + H5N4Am1F1 + H5N4Am2F1 ) / ( H3N4F1 + H4N4F1 + H4N4F2 + H5N4F1 + H5N4F2 + H5N4Am1F1 + H5N4Am2F1 )
A3D0F		A3D0F = ( H3N5F1 + H4N5F1 + H4N5F2 + H5N5F1 + H4N5F3 + H5N5F2 + H6N5F1 + H5N5F3 + H6N5Am1F1 + H6N5Am2F1 ) / ( H3N5 + H3N5F1 + H4N5F1 + H4N5F2 + H5N5F1 + H4N5F3 + H5N5F2 + H6N5F1 + H5N5F3 + H6N5Am1F1 + H6N5Am2F1 )
A4D0F		A4D0F = ( H3N6F1 + H4N6F2 + H5N6F2 + H5N6F3 + H6N6F3 + H6N6F4 ) / ( H3N6F1 + H4N6F2 + H5N6F2 + H5N6F3 + H6N6F3 + H6N6F4 )
A1SF	Fucosylated and sialylated species within monoantennary with sialylation	A1SF = ( H4N3D1F1 + H3N3D2F4 ) / ( H4N3D1F1 + H3N3D2F4 )
A2SF		A2SF = ( H4N4F1D1 + H5N4Am1F1 + H5N4D1F1 + H5N4Am2F1 + H5N4Am1D1F1 + H5N4D2F1 ) / ( H4N4F1D1 + H5N4D1 + H5N4Am1F1 + H5N4D1F1 + H5N4D2 + H5N4Am2F1 + H5N4Am1D1F1 + H5N4D2F1 )
A3SF		A3SF = ( H4N5D1F1 + H5N5D1F1 + H6N5Am1F1 + H5N5D1F2 + H6N5D1F1 + H5N5D2F1 + H6N5Am2F1 + H6N5Am1D1F1 + H6N5D1F3 ) / ( H4N5D1F1 + H5N5D1 + H5N5D1F1 + H6N5Am1F1 + H5N5D1F2 + H6N5D1F1 + H5N5D2F1 + H6N5Am2F1 + H6N5Am1D1F1 + H6N5D1F3 + H6N5Am1D2 )
A4SF		A4SF = ( H4N6D1F1 + H5N6D1F1 + H5N6D1F2 + H6N6D1F1 + H7N6D1F1 + H6N6D1F3 + H7N6D1F2 ) / ( H4N6D1F1 + H5N6D1F1 + H5N6D1F2 + H6N6D1F1 + H7N6D1F1 + H6N6D1F3 + H7N6D1F2 )
CSF	Fucosylated and sialylated species within species with sialylation	CSF = ( H4N3D1F1 + H4N4F1D1 + H5N4Am1F1 + H5N4D1F1 + H4N5D1F1 + H5N5D1F1 + H3N3D2F4 + H4N6D1F1 + H5N4Am2F1 + H5N4Am1D1F1 + H5N4D2F1 + H6N5Am1F1 + H5N5D1F2 + H6N5D1F1 + H5N6D1F1 + H5N5D2F1 + H5N6D1F2 + H6N6D1F1 + H6N5Am2F1 + H6N5Am1D1F1 + H6N5D1F3 + H7N6D1F1 + H6N6D1F3 + H7N6D1F2 ) / ( H4N3D1F1 + H4N4F1D1 + H5N4D1 + H5N4Am1F1 + H5N4D1F1 + H4N5D1F1 + H5N5D1 + H5N4D2 + H5N5D1F1 + H3N3D2F4 + H4N6D1F1…
A2AmF	Fucosylated and α2,3-linked sialic acid species within monoantennary with α2,3-linked sialic acid	A2AmF = ( H5N4Am1F1 + H5N4Am2F1 + H5N4Am1D1F1 ) / ( H5N4Am1F1 + H5N4Am2F1 + H5N4Am1D1F1 )
A3AmF		A3AmF = ( H6N5Am1F1 + H6N5Am2F1 + H6N5Am1D1F1 ) / ( H6N5Am1F1 + H6N5Am2F1 + H6N5Am1D1F1 + H6N5Am1D2 )
CAmF	Fucosylated and α2,3-linked sialic acid species within species with α2,3-linked sialic acid	CAmF = ( H5N4Am1F1 + H5N4Am2F1 + H5N4Am1D1F1 + H6N5Am1F1 + H6N5Am2F1 + H6N5Am1D1F1 ) / ( H5N4Am1F1 + H5N4Am2F1 + H5N4Am1D1F1 + H6N5Am1F1 + H6N5Am2F1 + H6N5Am1D1F1 + H6N5Am1D2 )
A1DF	Fucosylated and α2,6-linked sialic acid species within monoantennay with α2,6-linked sialic acid	A1DF = ( H4N3D1F1 + H3N3D2F4 ) / ( H4N3D1F1 + H3N3D2F4 )
A2DF		A2DF = ( H4N4F1D1 + H5N4D1F1 + H5N4Am1D1F1 + H5N4D2F1 ) / ( H4N4F1D1 + H5N4D1 + H5N4D1F1 + H5N4D2 + H5N4Am1D1F1 + H5N4D2F1 )
A3DF		A3DF = ( H4N5D1F1 + H5N5D1F1 + H5N5D1F2 + H6N5D1F1 + H5N5D2F1 + H6N5Am1D1F1 + H6N5D1F3 ) / ( H4N5D1F1 + H5N5D1 + H5N5D1F1 + H5N5D1F2 + H6N5D1F1 + H5N5D2F1 + H6N5Am1D1F1 + H6N5D1F3 + H6N5Am1D2 )
A4DF		A4DF = ( H4N6D1F1 + H5N6D1F1 + H5N6D1F2 + H6N6D1F1 + H7N6D1F1 + H6N6D1F3 + H7N6D1F2 ) / ( H4N6D1F1 + H5N6D1F1 + H5N6D1F2 + H6N6D1F1 + H7N6D1F1 + H6N6D1F3 + H7N6D1F2 )
CDF	Fucosylated and α2,6-linked sialic acid species within species with α2,6-linked sialic acid	CDF = ( H4N3D1F1 + H4N4F1D1 + H5N4D1F1 + H4N5D1F1 + H5N5D1F1 + H3N3D2F4 + H4N6D1F1 + H5N4Am1D1F1 + H5N4D2F1 + H5N5D1F2 + H6N5D1F1 + H5N6D1F1 + H5N5D2F1 + H5N6D1F2 + H6N6D1F1 + H6N5Am1D1F1 + H6N5D1F3 + H7N6D1F1 + H6N6D1F3 + H7N6D1F2 ) / ( H4N3D1F1 + H4N4F1D1 + H5N4D1 + H5N4D1F1 + H4N5D1F1 + H5N5D1 + H5N4D2 + H5N5D1F1 + H3N3D2F4 + H4N6D1F1 + H5N4Am1D1F1 + H5N4D2F1 + H5N5D1F2 + H6N5D1F1 + H5N6D1F1 +…
A1SFa		A1SFa = ( H3N3D2F4 ) / ( H4N3D1F1 + H3N3D2F4 )
A3SFa		A3SFa = ( H5N5D1F2 + H6N5D1F3 ) / ( H4N5D1F1 + H5N5D1 + H5N5D1F1 + H6N5Am1F1 + H5N5D1F2 + H6N5D1F1 + H5N5D2F1 + H6N5Am2F1 + H6N5Am1D1F1 + H6N5D1F3 + H6N5Am1D2 )
A4SFa	Multiple fucosylated and sialylation species within species with sialylation	A4SFa = ( H5N6D1F2 + H6N6D1F3 + H7N6D1F2 ) / ( H4N6D1F1 + H5N6D1F1 + H5N6D1F2 + H6N6D1F1 + H7N6D1F1 + H6N6D1F3 + H7N6D1F2 )
CSFa		CSFa = ( H3N3D2F4 + H5N5D1F2 + H5N6D1F2 + H6N5D1F3 + H6N6D1F3 + H7N6D1F2 ) / ( H4N3D1F1 + H4N4F1D1 + H5N4D1 + H5N4Am1F1 + H5N4D1F1 + H4N5D1F1 + H5N5D1 + H5N4D2 + H5N5D1F1 + H3N3D2F4 + H4N6D1F1 + H5N4Am2F1 + H5N4Am1D1F1 + H5N4D2F1 + H6N5Am1F1 + H5N5D1F2 + H6N5D1F1 + H5N6D1F1 + H5N5D2F1 + H5N6D1F2 + H6N6D1F1 + H6N5Am2F1 + H6N5Am1D1F1 + H6N5D1F3 + H7N6D1F1 + H6N5Am1D2 + H6N6D1F3 + H7N6D1F2 )
A1DFa		A1DFa = ( H3N3D2F4 ) / ( H4N3D1F1 + H3N3D2F4 )
A3DFa		A3DFa = ( H5N5D1F2 + H6N5D1F3 ) / ( H4N5D1F1 + H5N5D1 + H5N5D1F1 + H5N5D1F2 + H6N5D1F1 + H5N5D2F1 + H6N5Am1D1F1 + H6N5D1F3 + H6N5Am1D2 )
A4DFa	Multiple fucosylated and α2,6-linked sialic acid species within species with α2,6-linked sialic acid	A4DFa = ( H5N6D1F2 + H6N6D1F3 + H7N6D1F2 ) / ( H4N6D1F1 + H5N6D1F1 + H5N6D1F2 + H6N6D1F1 + H7N6D1F1 + H6N6D1F3 + H7N6D1F2 )
CDFa	Galactosylation per antenna within monoantennary	CDFa = ( H3N3D2F4 + H5N5D1F2 + H5N6D1F2 + H6N5D1F3 + H6N6D1F3 + H7N6D1F2 ) / ( H4N3D1F1 + H4N4F1D1 + H5N4D1 + H5N4D1F1 + H4N5D1F1 + H5N5D1 + H5N4D2 + H5N5D1F1 + H3N3D2F4 + H4N6D1F1 + H5N4Am1D1F1 + H5N4D2F1 + H5N5D1F2 + H6N5D1F1 + H5N6D1F1 + H5N5D2F1 + H5N6D1F2 + H6N6D1F1 + H6N5Am1D1F1 + H6N5D1F3 + H7N6D1F1 + H6N5Am1D2 + H6N6D1F3 + H7N6D1F2 )
A1G		A1G = ( 0/1 * ( H3N3D2F4 ) + 1/1 * ( H4N3D1F1 ) ) / ( H4N3D1F1 + H3N3D2F4 )
A2G		A2G = ( 0/2 * ( H3N4F1 ) + 1/2 * ( H4N4F1 + H4N4F2 + H4N4F1D1 ) + 2/2 * ( H5N4F1 + H5N4F2 + H5N4D1 + H5N4Am1F1 + H5N4D1F1 + H5N4D2 + H5N4Am2F1 + H5N4Am1D1F1 + H5N4D2F1 ) ) / ( H3N4F1 + H4N4F1 + H4N4F2 + H5N4F1 + H5N4F2 + H4N4F1D1 + H5N4D1 + H5N4Am1F1 + H5N4D1F1 + H5N4D2 + H5N4Am2F1 + H5N4Am1D1F1 + H5N4D2F1 )
A3G		A3G = ( 0/3 * ( H3N5 + H3N5F1 ) + 1/3 * ( H4N5F1 + H4N5F2 + H4N5F3 + H4N5D1F1 ) + 2/3 * ( H5N5F1 + H5N5F2 + H5N5D1 + H5N5F3 + H5N5D1F1 + H5N5D1F2 + H5N5D2F1 ) + 3/3 * ( H6N5F1 + H6N5Am1F1 + H6N5D1F1 + H6N5Am2F1 + H6N5Am1D1F1 + H6N5D1F3 + H6N5Am1D2 ) ) / ( H3N5 + H3N5F1 + H4N5F1 + H4N5F2 + H5N5F1 + H4N5F3 + H5N5F2 + H4N5D1F1 + H6N5F1 + H5N5D1 + H5N5F3 + H5N5D1F1 + H6N5Am1F1 + H5N5D1F2 + H6N5D1F1 +…
A4G	Galactosylation per antenna within monoantennary with no fucosylation	A4G = ( 0/4 * ( H3N6F1 ) + 1/4 * ( H4N6F2 + H4N6D1F1 ) + 2/4 * ( H5N6F2 + H5N6F3 + H5N6D1F1 + H5N6D1F2 ) + 3/4 * ( H6N6F3 + H6N6D1F1 + H6N6F4 + H6N6D1F3 ) + 4/4 * ( H7N6D1F1 + H7N6D1F2 ) ) / ( H3N6F1 + H4N6F2 + H5N6F2 + H4N6D1F1 + H5N6F3 + H5N6D1F1 + H6N6F3 + H5N6D1F2 + H6N6D1F1 + H6N6F4 + H7N6D1F1 + H6N6D1F3 + H7N6D1F2 )
A2F0G		A2F0G = ( 0/2 * (0) + 1/2 * (0) + 2/2 * ( H5N4D1 + H5N4D2 ) ) / ( H5N4D1 + H5N4D2 )
A3F0G		A3F0G = ( 0/3 * ( H3N5 ) + 1/3 * (0) + 2/3 * ( H5N5D1 ) + 3/3 * ( H6N5Am1D2 ) ) / ( H3N5 + H5N5D1 + H6N5Am1D2 )
A1FG		A1FG = ( 0/1 * ( H3N3D2F4 ) + 1/1 * ( H4N3D1F1 ) ) / ( H4N3D1F1 + H3N3D2F4 )
A2FG		A2FG = ( 0/2 * ( H3N4F1 ) + 1/2 * ( H4N4F1 + H4N4F2 + H4N4F1D1 ) + 2/2 * ( H5N4F1 + H5N4F2 + H5N4Am1F1 + H5N4D1F1 + H5N4Am2F1 + H5N4Am1D1F1 + H5N4D2F1 ) ) / ( H3N4F1 + H4N4F1 + H4N4F2 + H5N4F1 + H5N4F2 + H4N4F1D1 + H5N4Am1F1 + H5N4D1F1 + H5N4Am2F1 + H5N4Am1D1F1 + H5N4D2F1 )
A3FG		A3FG = ( 0/3 * ( H3N5F1 ) + 1/3 * ( H4N5F1 + H4N5F2 + H4N5F3 + H4N5D1F1 ) + 2/3 * ( H5N5F1 + H5N5F2 + H5N5F3 + H5N5D1F1 + H5N5D1F2 + H5N5D2F1 ) + 3/3 * ( H6N5F1 + H6N5Am1F1 + H6N5D1F1 + H6N5Am2F1 + H6N5Am1D1F1 + H6N5D1F3 ) ) / ( H3N5F1 + H4N5F1 + H4N5F2 + H5N5F1 + H4N5F3 + H5N5F2 + H4N5D1F1 + H6N5F1 + H5N5F3 + H5N5D1F1 + H6N5Am1F1 + H5N5D1F2 + H6N5D1F1 + H5N5D2F1 + H6N5Am2F1 + H6N5Am1D1F1 + H6N5D…
A4FG	Galactosylation per antenna within Diantennary with no sialylation	A4FG = ( 0/4 * ( H3N6F1 ) + 1/4 * ( H4N6F2 + H4N6D1F1 ) + 2/4 * ( H5N6F2 + H5N6F3 + H5N6D1F1 + H5N6D1F2 ) + 3/4 * ( H6N6F3 + H6N6D1F1 + H6N6F4 + H6N6D1F3 ) + 4/4 * ( H7N6D1F1 + H7N6D1F2 ) ) / ( H3N6F1 + H4N6F2 + H5N6F2 + H4N6D1F1 + H5N6F3 + H5N6D1F1 + H6N6F3 + H5N6D1F2 + H6N6D1F1 + H6N6F4 + H7N6D1F1 + H6N6D1F3 + H7N6D1F2 )
A2S0G	Galactosylation per antenna within Diantennary with sialylation	A2S0G = ( 0/2 * ( H3N4F1 ) + 1/2 * ( H4N4F1 + H4N4F2 ) + 2/2 * ( H5N4F1 + H5N4F2 ) ) / ( H3N4F1 + H4N4F1 + H4N4F2 + H5N4F1 + H5N4F2 )
A2SG	Galactosylation per antenna within Diantennary with no sialylation and no fucosylation	A2SG = ( 0/2 * (0) + 1/2 * ( H4N4F1D1 ) + 2/2 * ( H5N4D1 + H5N4Am1F1 + H5N4D1F1 + H5N4D2 + H5N4Am2F1 + H5N4Am1D1F1 + H5N4D2F1 ) ) / ( H4N4F1D1 + H5N4D1 + H5N4Am1F1 + H5N4D1F1 + H5N4D2 + H5N4Am2F1 + H5N4Am1D1F1 + H5N4D2F1 )
A2FS0G	Galactosylation per antenna within Diantennary with sialylation and no fucosylation	A2FS0G = ( 0/2 * ( H3N4F1 ) + 1/2 * ( H4N4F1 + H4N4F2 ) + 2/2 * ( H5N4F1 + H5N4F2 ) ) / ( H3N4F1 + H4N4F1 + H4N4F2 + H5N4F1 + H5N4F2 )
A2F0SG	Galactosylation per antenna within Diantennary with sialylation and fucosylation	A2F0SG = ( 0/2 * (0) + 1/2 * (0) + 2/2 * ( H5N4D1 + H5N4D2 ) ) / ( H5N4D1 + H5N4D2 )
A2FSG	Sialylation per antenna within monoantennary	A2FSG = ( 0/2 * (0) + 1/2 * ( H4N4F1D1 ) + 2/2 * ( H5N4Am1F1 + H5N4D1F1 + H5N4Am2F1 + H5N4Am1D1F1 + H5N4D2F1 ) ) / ( H4N4F1D1 + H5N4Am1F1 + H5N4D1F1 + H5N4Am2F1 + H5N4Am1D1F1 + H5N4D2F1 )
A1S		A1S = ( 0/1 * (0) + 1/1 * ( H4N3D1F1 ) ) / ( H4N3D1F1 + H3N3D2F4 )
A2S		A2S = ( 0/2 * ( H3N4F1 + H4N4F1 + H4N4F2 + H5N4F1 + H5N4F2 ) + 1/2 * ( H4N4F1D1 + H5N4D1 + H5N4Am1F1 + H5N4D1F1 ) + 2/2 * ( H5N4D2 + H5N4Am2F1 + H5N4Am1D1F1 + H5N4D2F1 ) ) / ( H3N4F1 + H4N4F1 + H4N4F2 + H5N4F1 + H5N4F2 + H4N4F1D1 + H5N4D1 + H5N4Am1F1 + H5N4D1F1 + H5N4D2 + H5N4Am2F1 + H5N4Am1D1F1 + H5N4D2F1 )
A3S		A3S = ( 0/3 * ( H3N5 + H3N5F1 + H4N5F1 + H4N5F2 + H5N5F1 + H4N5F3 + H5N5F2 + H6N5F1 + H5N5F3 ) + 1/3 * ( H4N5D1F1 + H5N5D1 + H5N5D1F1 + H6N5Am1F1 + H5N5D1F2 + H6N5D1F1 + H6N5D1F3 ) + 2/3 * ( H5N5D2F1 + H6N5Am2F1 + H6N5Am1D1F1 ) + 3/3 * ( H6N5Am1D2 ) ) / ( H3N5 + H3N5F1 + H4N5F1 + H4N5F2 + H5N5F1 + H4N5F3 + H5N5F2 + H4N5D1F1 + H6N5F1 + H5N5D1 + H5N5F3 + H5N5D1F1 + H6N5Am1F1 + H5N5D1F2 + H6N5D1F1 +…
A4S	Sialylation per antenna within monoantennary with no-fucosylation	A4S = ( 0/4 * ( H3N6F1 + H4N6F2 + H5N6F2 + H5N6F3 + H6N6F3 + H6N6F4 ) + 1/4 * ( H4N6D1F1 + H5N6D1F1 + H5N6D1F2 + H6N6D1F1 + H7N6D1F1 + H6N6D1F3 + H7N6D1F2 ) + 2/4 * (0) + 3/4 * (0) + 4/4 * (0) ) / ( H3N6F1 + H4N6F2 + H5N6F2 + H4N6D1F1 + H5N6F3 + H5N6D1F1 + H6N6F3 + H5N6D1F2 + H6N6D1F1 + H6N6F4 + H7N6D1F1 + H6N6D1F3 + H7N6D1F2 )
A2F0S		A2F0S = ( 0/2 * (0) + 1/2 * ( H5N4D1 ) + 2/2 * ( H5N4D2 ) ) / ( H5N4D1 + H5N4D2 )
A3F0S		A3F0S = ( 0/3 * ( H3N5 ) + 1/3 * ( H5N5D1 ) + 2/3 * (0) + 3/3 * ( H6N5Am1D2 ) ) / ( H3N5 + H5N5D1 + H6N5Am1D2 )
A1FS	Sialylation per antenna within monoantennary with fucosylation	A1FS = ( 0/1 * (0) + 1/1 * ( H4N3D1F1 ) ) / ( H4N3D1F1 + H3N3D2F4 )
A2FS		A2FS = ( 0/2 * ( H3N4F1 + H4N4F1 + H4N4F2 + H5N4F1 + H5N4F2 ) + 1/2 * ( H4N4F1D1 + H5N4Am1F1 + H5N4D1F1 ) + 2/2 * ( H5N4Am2F1 + H5N4Am1D1F1 + H5N4D2F1 ) ) / ( H3N4F1 + H4N4F1 + H4N4F2 + H5N4F1 + H5N4F2 + H4N4F1D1 + H5N4Am1F1 + H5N4D1F1 + H5N4Am2F1 + H5N4Am1D1F1 + H5N4D2F1 )
A3FS		A3FS = ( 0/3 * ( H3N5F1 + H4N5F1 + H4N5F2 + H5N5F1 + H4N5F3 + H5N5F2 + H6N5F1 + H5N5F3 ) + 1/3 * ( H4N5D1F1 + H5N5D1F1 + H6N5Am1F1 + H5N5D1F2 + H6N5D1F1 + H6N5D1F3 ) + 2/3 * ( H5N5D2F1 + H6N5Am2F1 + H6N5Am1D1F1 ) + 3/3 * (0) ) / ( H3N5F1 + H4N5F1 + H4N5F2 + H5N5F1 + H4N5F3 + H5N5F2 + H4N5D1F1 + H6N5F1 + H5N5F3 + H5N5D1F1 + H6N5Am1F1 + H5N5D1F2 + H6N5D1F1 + H5N5D2F1 + H6N5Am2F1 + H6N5Am1D1F1 + H6N…
A4FS	Sialylation per antenna within monoantennary with multiple-fucosylation	A4FS = ( 0/4 * ( H3N6F1 + H4N6F2 + H5N6F2 + H5N6F3 + H6N6F3 + H6N6F4 ) + 1/4 * ( H4N6D1F1 + H5N6D1F1 + H5N6D1F2 + H6N6D1F1 + H7N6D1F1 + H6N6D1F3 + H7N6D1F2 ) + 2/4 * (0) + 3/4 * (0) + 4/4 * (0) ) / ( H3N6F1 + H4N6F2 + H5N6F2 + H4N6D1F1 + H5N6F3 + H5N6D1F1 + H6N6F3 + H5N6D1F2 + H6N6D1F1 + H6N6F4 + H7N6D1F1 + H6N6D1F3 + H7N6D1F2 )
A2FaS		A2FaS = ( 0/2 * ( H4N4F2 + H5N4F2 ) + 1/2 * (0) + 2/2 * (0) ) / ( H4N4F2 + H5N4F2 )
A3FaS		A3FaS = ( 0/3 * ( H4N5F2 + H4N5F3 + H5N5F2 + H5N5F3 ) + 1/3 * ( H5N5D1F2 + H6N5D1F3 ) + 2/3 * (0) + 3/3 * (0) ) / ( H4N5F2 + H4N5F3 + H5N5F2 + H5N5F3 + H5N5D1F2 + H6N5D1F3 )
A4FaS	α2,3-linked sialic acid per antenna within monoantennary	A4FaS = ( 0/4 * ( H4N6F2 + H5N6F2 + H5N6F3 + H6N6F3 + H6N6F4 ) + 1/4 * ( H5N6D1F2 + H6N6D1F3 + H7N6D1F2 ) + 2/4 * (0) + 3/4 * (0) + 4/4 * (0) ) / ( H4N6F2 + H5N6F2 + H5N6F3 + H6N6F3 + H5N6D1F2 + H6N6F4 + H6N6D1F3 + H7N6D1F2 )
A1Am		A1Am = ( 0/1 * ( H4N3D1F1 + H3N3D2F4 ) + 1/1 * (0) ) / ( H4N3D1F1 + H3N3D2F4 )
A2Am		A2Am = ( 0/2 * ( H3N4F1 + H4N4F1 + H4N4F2 + H5N4F1 + H5N4F2 + H4N4F1D1 + H5N4D1 + H5N4D1F1 + H5N4D2 + H5N4D2F1 ) + 1/2 * ( H5N4Am1F1 + H5N4Am1D1F1 ) + 2/2 * ( H5N4Am2F1 ) ) / ( H3N4F1 + H4N4F1 + H4N4F2 + H5N4F1 + H5N4F2 + H4N4F1D1 + H5N4D1 + H5N4Am1F1 + H5N4D1F1 + H5N4D2 + H5N4Am2F1 + H5N4Am1D1F1 + H5N4D2F1 )
A3Am		A3Am = ( 0/3 * ( H3N5 + H3N5F1 + H4N5F1 + H4N5F2 + H5N5F1 + H4N5F3 + H5N5F2 + H4N5D1F1 + H6N5F1 + H5N5D1 + H5N5F3 + H5N5D1F1 + H5N5D1F2 + H6N5D1F1 + H5N5D2F1 + H6N5D1F3 ) + 1/3 * ( H6N5Am1F1 + H6N5Am1D1F1 + H6N5Am1D2 ) + 2/3 * ( H6N5Am2F1 ) + 3/3 * (0) ) / ( H3N5 + H3N5F1 + H4N5F1 + H4N5F2 + H5N5F1 + H4N5F3 + H5N5F2 + H4N5D1F1 + H6N5F1 + H5N5D1 + H5N5F3 + H5N5D1F1 + H6N5Am1F1 + H5N5D1F2 + H6N5D1F…
A4Am	α2,3-linked sialic acid per antenna within monoantennary with no-fucosylation	A4Am = ( 0/4 * ( H3N6F1 + H4N6F2 + H5N6F2 + H4N6D1F1 + H5N6F3 + H5N6D1F1 + H6N6F3 + H5N6D1F2 + H6N6D1F1 + H6N6F4 + H7N6D1F1 + H6N6D1F3 + H7N6D1F2 ) + 1/4 * (0) + 2/4 * (0) + 3/4 * (0) + 4/4 * (0) ) / ( H3N6F1 + H4N6F2 + H5N6F2 + H4N6D1F1 + H5N6F3 + H5N6D1F1 + H6N6F3 + H5N6D1F2 + H6N6D1F1 + H6N6F4 + H7N6D1F1 + H6N6D1F3 + H7N6D1F2 )
A2F0Am		A2F0Am = ( 0/2 * ( H5N4D1 + H5N4D2 ) + 1/2 * (0) + 2/2 * (0) ) / ( H5N4D1 + H5N4D2 )
A3F0Am		A3F0Am = ( 0/3 * ( H3N5 + H5N5D1 ) + 1/3 * ( H6N5Am1D2 ) + 2/3 * (0) + 3/3 * (0) ) / ( H3N5 + H5N5D1 + H6N5Am1D2 )
A1FAm	α2,3-linked sialic acid per antenna within monoantennary with fucosylation	A1FAm = ( 0/1 * ( H4N3D1F1 + H3N3D2F4 ) + 1/1 * (0) ) / ( H4N3D1F1 + H3N3D2F4 )
A2FAm		A2FAm = ( 0/2 * ( H3N4F1 + H4N4F1 + H4N4F2 + H5N4F1 + H5N4F2 + H4N4F1D1 + H5N4D1F1 + H5N4D2F1 ) + 1/2 * ( H5N4Am1F1 + H5N4Am1D1F1 ) + 2/2 * ( H5N4Am2F1 ) ) / ( H3N4F1 + H4N4F1 + H4N4F2 + H5N4F1 + H5N4F2 + H4N4F1D1 + H5N4Am1F1 + H5N4D1F1 + H5N4Am2F1 + H5N4Am1D1F1 + H5N4D2F1 )
A3FAm		A3FAm = ( 0/3 * ( H3N5F1 + H4N5F1 + H4N5F2 + H5N5F1 + H4N5F3 + H5N5F2 + H4N5D1F1 + H6N5F1 + H5N5F3 + H5N5D1F1 + H5N5D1F2 + H6N5D1F1 + H5N5D2F1 + H6N5D1F3 ) + 1/3 * ( H6N5Am1F1 + H6N5Am1D1F1 ) + 2/3 * ( H6N5Am2F1 ) + 3/3 * (0) ) / ( H3N5F1 + H4N5F1 + H4N5F2 + H5N5F1 + H4N5F3 + H5N5F2 + H4N5D1F1 + H6N5F1 + H5N5F3 + H5N5D1F1 + H6N5Am1F1 + H5N5D1F2 + H6N5D1F1 + H5N5D2F1 + H6N5Am2F1 + H6N5Am1D1F1 + H6…
A4FAm	α2,3-linked sialic acid per antenna within monoantennary with multiple-fucosylation	A4FAm = ( 0/4 * ( H3N6F1 + H4N6F2 + H5N6F2 + H4N6D1F1 + H5N6F3 + H5N6D1F1 + H6N6F3 + H5N6D1F2 + H6N6D1F1 + H6N6F4 + H7N6D1F1 + H6N6D1F3 + H7N6D1F2 ) + 1/4 * (0) + 2/4 * (0) + 3/4 * (0) + 4/4 * (0) ) / ( H3N6F1 + H4N6F2 + H5N6F2 + H4N6D1F1 + H5N6F3 + H5N6D1F1 + H6N6F3 + H5N6D1F2 + H6N6D1F1 + H6N6F4 + H7N6D1F1 + H6N6D1F3 + H7N6D1F2 )
A1FaAm		A1FaAm = ( 0/1 * ( H3N3D2F4 ) + 1/1 * (0) ) / ( H3N3D2F4 )
A2FaAm		A2FaAm = ( 0/2 * ( H4N4F2 + H5N4F2 ) + 1/2 * (0) + 2/2 * (0) ) / ( H4N4F2 + H5N4F2 )
A3FaAm		A3FaAm = ( 0/3 * ( H4N5F2 + H4N5F3 + H5N5F2 + H5N5F3 + H5N5D1F2 + H6N5D1F3 ) + 1/3 * (0) + 2/3 * (0) + 3/3 * (0) ) / ( H4N5F2 + H4N5F3 + H5N5F2 + H5N5F3 + H5N5D1F2 + H6N5D1F3 )
A4FaAm	α2,6-linked sialic acid per antenna within monoantennary	A4FaAm = ( 0/4 * ( H4N6F2 + H5N6F2 + H5N6F3 + H6N6F3 + H5N6D1F2 + H6N6F4 + H6N6D1F3 + H7N6D1F2 ) + 1/4 * (0) + 2/4 * (0) + 3/4 * (0) + 4/4 * (0) ) / ( H4N6F2 + H5N6F2 + H5N6F3 + H6N6F3 + H5N6D1F2 + H6N6F4 + H6N6D1F3 + H7N6D1F2 )
A1D		A1D = ( 0/1 * (0) + 1/1 * ( H4N3D1F1 ) ) / ( H4N3D1F1 + H3N3D2F4 )
A2D		A2D = ( 0/2 * ( H3N4F1 + H4N4F1 + H4N4F2 + H5N4F1 + H5N4F2 + H5N4Am1F1 + H5N4Am2F1 ) + 1/2 * ( H4N4F1D1 + H5N4D1 + H5N4D1F1 + H5N4Am1D1F1 ) + 2/2 * ( H5N4D2 + H5N4D2F1 ) ) / ( H3N4F1 + H4N4F1 + H4N4F2 + H5N4F1 + H5N4F2 + H4N4F1D1 + H5N4D1 + H5N4Am1F1 + H5N4D1F1 + H5N4D2 + H5N4Am2F1 + H5N4Am1D1F1 + H5N4D2F1 )
A3D		A3D = ( 0/3 * ( H3N5 + H3N5F1 + H4N5F1 + H4N5F2 + H5N5F1 + H4N5F3 + H5N5F2 + H6N5F1 + H5N5F3 + H6N5Am1F1 + H6N5Am2F1 ) + 1/3 * ( H4N5D1F1 + H5N5D1 + H5N5D1F1 + H5N5D1F2 + H6N5D1F1 + H6N5Am1D1F1 + H6N5D1F3 ) + 2/3 * ( H5N5D2F1 + H6N5Am1D2 ) + 3/3 * (0) ) / ( H3N5 + H3N5F1 + H4N5F1 + H4N5F2 + H5N5F1 + H4N5F3 + H5N5F2 + H4N5D1F1 + H6N5F1 + H5N5D1 + H5N5F3 + H5N5D1F1 + H6N5Am1F1 + H5N5D1F2 + H6N5D1F1…
A4D	α2,6-linked sialic acid per antenna within monoantennary with no fucosylation	A4D = ( 0/4 * ( H3N6F1 + H4N6F2 + H5N6F2 + H5N6F3 + H6N6F3 + H6N6F4 ) + 1/4 * ( H4N6D1F1 + H5N6D1F1 + H5N6D1F2 + H6N6D1F1 + H7N6D1F1 + H6N6D1F3 + H7N6D1F2 ) + 2/4 * (0) + 3/4 * (0) + 4/4 * (0) ) / ( H3N6F1 + H4N6F2 + H5N6F2 + H4N6D1F1 + H5N6F3 + H5N6D1F1 + H6N6F3 + H5N6D1F2 + H6N6D1F1 + H6N6F4 + H7N6D1F1 + H6N6D1F3 + H7N6D1F2 )
A2F0D		A2F0D = ( 0/2 * (0) + 1/2 * ( H5N4D1 ) + 2/2 * ( H5N4D2 ) ) / ( H5N4D1 + H5N4D2 )
A3F0D		A3F0D = ( 0/3 * ( H3N5 ) + 1/3 * ( H5N5D1 ) + 2/3 * ( H6N5Am1D2 ) + 3/3 * (0) ) / ( H3N5 + H5N5D1 + H6N5Am1D2 )
A1FD	α2,6-linked sialic acid per antenna within monoantennary with fucosylation	A1FD = ( 0/1 * (0) + 1/1 * ( H4N3D1F1 ) ) / ( H4N3D1F1 + H3N3D2F4 )
A2FD		A2FD = ( 0/2 * ( H3N4F1 + H4N4F1 + H4N4F2 + H5N4F1 + H5N4F2 + H5N4Am1F1 + H5N4Am2F1 ) + 1/2 * ( H4N4F1D1 + H5N4D1F1 + H5N4Am1D1F1 ) + 2/2 * ( H5N4D2F1 ) ) / ( H3N4F1 + H4N4F1 + H4N4F2 + H5N4F1 + H5N4F2 + H4N4F1D1 + H5N4Am1F1 + H5N4D1F1 + H5N4Am2F1 + H5N4Am1D1F1 + H5N4D2F1 )
A3FD		A3FD = ( 0/3 * ( H3N5F1 + H4N5F1 + H4N5F2 + H5N5F1 + H4N5F3 + H5N5F2 + H6N5F1 + H5N5F3 + H6N5Am1F1 + H6N5Am2F1 ) + 1/3 * ( H4N5D1F1 + H5N5D1F1 + H5N5D1F2 + H6N5D1F1 + H6N5Am1D1F1 + H6N5D1F3 ) + 2/3 * ( H5N5D2F1 ) + 3/3 * (0) ) / ( H3N5F1 + H4N5F1 + H4N5F2 + H5N5F1 + H4N5F3 + H5N5F2 + H4N5D1F1 + H6N5F1 + H5N5F3 + H5N5D1F1 + H6N5Am1F1 + H5N5D1F2 + H6N5D1F1 + H5N5D2F1 + H6N5Am2F1 + H6N5Am1D1F1 + H6N…
A4FD	Sialylation per antenna within monoantennary with galactosylation	A4FD = ( 0/4 * ( H3N6F1 + H4N6F2 + H5N6F2 + H5N6F3 + H6N6F3 + H6N6F4 ) + 1/4 * ( H4N6D1F1 + H5N6D1F1 + H5N6D1F2 + H6N6D1F1 + H7N6D1F1 + H6N6D1F3 + H7N6D1F2 ) + 2/4 * (0) + 3/4 * (0) + 4/4 * (0) ) / ( H3N6F1 + H4N6F2 + H5N6F2 + H4N6D1F1 + H5N6F3 + H5N6D1F1 + H6N6F3 + H5N6D1F2 + H6N6D1F1 + H6N6F4 + H7N6D1F1 + H6N6D1F3 + H7N6D1F2 )
A1GS		A1GS = ( ( 0/1 * (0) + 1/1 * ( H4N3D1F1 ) ) / ( H4N3D1F1 + H3N3D2F4 ) ) / ( ( 0/1 * ( H3N3D2F4 ) + 1/1 * ( H4N3D1F1 ) ) / ( H4N3D1F1 + H3N3D2F4 ) )
A2GS		A2GS = ( ( 0/2 * ( H3N4F1 + H4N4F1 + H4N4F2 + H5N4F1 + H5N4F2 ) + 1/2 * ( H4N4F1D1 + H5N4D1 + H5N4Am1F1 + H5N4D1F1 ) + 2/2 * ( H5N4D2 + H5N4Am2F1 + H5N4Am1D1F1 + H5N4D2F1 ) ) / ( H3N4F1 + H4N4F1 + H4N4F2 + H5N4F1 + H5N4F2 + H4N4F1D1 + H5N4D1 + H5N4Am1F1 + H5N4D1F1 + H5N4D2 + H5N4Am2F1 + H5N4Am1D1F1 + H5N4D2F1 ) ) / ( ( 0/2 * ( H3N4F1 ) + 1/2 * ( H4N4F1 + H4N4F2 + H4N4F1D1 ) + 2/2 * ( H5N4F1 + H5N…
A3GS		A3GS = ( ( 0/3 * ( H3N5 + H3N5F1 + H4N5F1 + H4N5F2 + H5N5F1 + H4N5F3 + H5N5F2 + H6N5F1 + H5N5F3 ) + 1/3 * ( H4N5D1F1 + H5N5D1 + H5N5D1F1 + H6N5Am1F1 + H5N5D1F2 + H6N5D1F1 + H6N5D1F3 ) + 2/3 * ( H5N5D2F1 + H6N5Am2F1 + H6N5Am1D1F1 ) + 3/3 * ( H6N5Am1D2 ) ) / ( H3N5 + H3N5F1 + H4N5F1 + H4N5F2 + H5N5F1 + H4N5F3 + H5N5F2 + H4N5D1F1 + H6N5F1 + H5N5D1 + H5N5F3 + H5N5D1F1 + H6N5Am1F1 + H5N5D1F2 + H6N5D1F…
A4GS	Sialylation per antenna within monoantennary with galactosylation and no fucosylation	A4GS = ( ( 0/4 * ( H3N6F1 + H4N6F2 + H5N6F2 + H5N6F3 + H6N6F3 + H6N6F4 ) + 1/4 * ( H4N6D1F1 + H5N6D1F1 + H5N6D1F2 + H6N6D1F1 + H7N6D1F1 + H6N6D1F3 + H7N6D1F2 ) + 2/4 * (0) + 3/4 * (0) + 4/4 * (0) ) / ( H3N6F1 + H4N6F2 + H5N6F2 + H4N6D1F1 + H5N6F3 + H5N6D1F1 + H6N6F3 + H5N6D1F2 + H6N6D1F1 + H6N6F4 + H7N6D1F1 + H6N6D1F3 + H7N6D1F2 ) ) / ( ( 0/4 * ( H3N6F1 ) + 1/4 * ( H4N6F2 + H4N6D1F1 ) + 2/4 * ( H…
A1F0GS		A1F0GS = ( ( 0/1 * (0) + 1/1 * (0) ) / (0) ) / ( ( 0/1 * (0) + 1/1 * (0) ) / (0) )
A2F0GS		A2F0GS = ( ( 0/2 * (0) + 1/2 * ( H5N4D1 ) + 2/2 * ( H5N4D2 ) ) / ( H5N4D1 + H5N4D2 ) ) / ( ( 0/2 * (0) + 1/2 * (0) + 2/2 * ( H5N4D1 + H5N4D2 ) ) / ( H5N4D1 + H5N4D2 ) )
A3F0GS		A3F0GS = ( ( 0/3 * ( H3N5 ) + 1/3 * ( H5N5D1 ) + 2/3 * (0) + 3/3 * ( H6N5Am1D2 ) ) / ( H3N5 + H5N5D1 + H6N5Am1D2 ) ) / ( ( 0/3 * ( H3N5 ) + 1/3 * (0) + 2/3 * ( H5N5D1 ) + 3/3 * ( H6N5Am1D2 ) ) / ( H3N5 + H5N5D1 + H6N5Am1D2 ) )
A1FGS	Sialylation per antenna within monoantennary with galactosylation and fucosylation	A1FGS = ( ( 0/1 * (0) + 1/1 * ( H4N3D1F1 ) ) / ( H4N3D1F1 + H3N3D2F4 ) ) / ( ( 0/1 * ( H3N3D2F4 ) + 1/1 * ( H4N3D1F1 ) ) / ( H4N3D1F1 + H3N3D2F4 ) )
A2FGS		A2FGS = ( ( 0/2 * ( H3N4F1 + H4N4F1 + H4N4F2 + H5N4F1 + H5N4F2 ) + 1/2 * ( H4N4F1D1 + H5N4Am1F1 + H5N4D1F1 ) + 2/2 * ( H5N4Am2F1 + H5N4Am1D1F1 + H5N4D2F1 ) ) / ( H3N4F1 + H4N4F1 + H4N4F2 + H5N4F1 + H5N4F2 + H4N4F1D1 + H5N4Am1F1 + H5N4D1F1 + H5N4Am2F1 + H5N4Am1D1F1 + H5N4D2F1 ) ) / ( ( 0/2 * ( H3N4F1 ) + 1/2 * ( H4N4F1 + H4N4F2 + H4N4F1D1 ) + 2/2 * ( H5N4F1 + H5N4F2 + H5N4Am1F1 + H5N4D1F1 + H5N4Am…
A3FGS		A3FGS = ( ( 0/3 * ( H3N5F1 + H4N5F1 + H4N5F2 + H5N5F1 + H4N5F3 + H5N5F2 + H6N5F1 + H5N5F3 ) + 1/3 * ( H4N5D1F1 + H5N5D1F1 + H6N5Am1F1 + H5N5D1F2 + H6N5D1F1 + H6N5D1F3 ) + 2/3 * ( H5N5D2F1 + H6N5Am2F1 + H6N5Am1D1F1 ) + 3/3 * (0) ) / ( H3N5F1 + H4N5F1 + H4N5F2 + H5N5F1 + H4N5F3 + H5N5F2 + H4N5D1F1 + H6N5F1 + H5N5F3 + H5N5D1F1 + H6N5Am1F1 + H5N5D1F2 + H6N5D1F1 + H5N5D2F1 + H6N5Am2F1 + H6N5Am1D1F1 + …
A4FGS	α2,3-linked sialic acid per antenna within monoantennary with galactosylation	A4FGS = ( ( 0/4 * ( H3N6F1 + H4N6F2 + H5N6F2 + H5N6F3 + H6N6F3 + H6N6F4 ) + 1/4 * ( H4N6D1F1 + H5N6D1F1 + H5N6D1F2 + H6N6D1F1 + H7N6D1F1 + H6N6D1F3 + H7N6D1F2 ) + 2/4 * (0) + 3/4 * (0) + 4/4 * (0) ) / ( H3N6F1 + H4N6F2 + H5N6F2 + H4N6D1F1 + H5N6F3 + H5N6D1F1 + H6N6F3 + H5N6D1F2 + H6N6D1F1 + H6N6F4 + H7N6D1F1 + H6N6D1F3 + H7N6D1F2 ) ) / ( ( 0/4 * ( H3N6F1 ) + 1/4 * ( H4N6F2 + H4N6D1F1 ) + 2/4 * ( …
A1GAm		A1GAm = ( ( 0/1 * ( H4N3D1F1 + H3N3D2F4 ) + 1/1 * (0) ) / ( H4N3D1F1 + H3N3D2F4 ) ) / ( ( 0/1 * ( H3N3D2F4 ) + 1/1 * ( H4N3D1F1 ) ) / ( H4N3D1F1 + H3N3D2F4 ) )
A2GAm		A2GAm = ( ( 0/2 * ( H3N4F1 + H4N4F1 + H4N4F2 + H5N4F1 + H5N4F2 + H4N4F1D1 + H5N4D1 + H5N4D1F1 + H5N4D2 + H5N4D2F1 ) + 1/2 * ( H5N4Am1F1 + H5N4Am1D1F1 ) + 2/2 * ( H5N4Am2F1 ) ) / ( H3N4F1 + H4N4F1 + H4N4F2 + H5N4F1 + H5N4F2 + H4N4F1D1 + H5N4D1 + H5N4Am1F1 + H5N4D1F1 + H5N4D2 + H5N4Am2F1 + H5N4Am1D1F1 + H5N4D2F1 ) ) / ( ( 0/2 * ( H3N4F1 ) + 1/2 * ( H4N4F1 + H4N4F2 + H4N4F1D1 ) + 2/2 * ( H5N4F1 + H5…
A3GAm		A3GAm = ( ( 0/3 * ( H3N5 + H3N5F1 + H4N5F1 + H4N5F2 + H5N5F1 + H4N5F3 + H5N5F2 + H4N5D1F1 + H6N5F1 + H5N5D1 + H5N5F3 + H5N5D1F1 + H5N5D1F2 + H6N5D1F1 + H5N5D2F1 + H6N5D1F3 ) + 1/3 * ( H6N5Am1F1 + H6N5Am1D1F1 + H6N5Am1D2 ) + 2/3 * ( H6N5Am2F1 ) + 3/3 * (0) ) / ( H3N5 + H3N5F1 + H4N5F1 + H4N5F2 + H5N5F1 + H4N5F3 + H5N5F2 + H4N5D1F1 + H6N5F1 + H5N5D1 + H5N5F3 + H5N5D1F1 + H6N5Am1F1 + H5N5D1F2 + H6N5…
A4GAm	of α2,3-linked sialic acid per antenna within monoantennary with galactosylation and no-fucosylation	A4GAm = ( ( 0/4 * ( H3N6F1 + H4N6F2 + H5N6F2 + H4N6D1F1 + H5N6F3 + H5N6D1F1 + H6N6F3 + H5N6D1F2 + H6N6D1F1 + H6N6F4 + H7N6D1F1 + H6N6D1F3 + H7N6D1F2 ) + 1/4 * (0) + 2/4 * (0) + 3/4 * (0) + 4/4 * (0) ) / ( H3N6F1 + H4N6F2 + H5N6F2 + H4N6D1F1 + H5N6F3 + H5N6D1F1 + H6N6F3 + H5N6D1F2 + H6N6D1F1 + H6N6F4 + H7N6D1F1 + H6N6D1F3 + H7N6D1F2 ) ) / ( ( 0/4 * ( H3N6F1 ) + 1/4 * ( H4N6F2 + H4N6D1F1 ) + 2/4 * …
A1F0GAm		A1F0GAm = ( ( 0/1 * (0) + 1/1 * (0) ) / (0) ) / ( ( 0/1 * (0) + 1/1 * (0) ) / (0) )
A2F0GAm		A2F0GAm = ( ( 0/2 * ( H5N4D1 + H5N4D2 ) + 1/2 * (0) + 2/2 * (0) ) / ( H5N4D1 + H5N4D2 ) ) / ( ( 0/2 * (0) + 1/2 * (0) + 2/2 * ( H5N4D1 + H5N4D2 ) ) / ( H5N4D1 + H5N4D2 ) )
A3F0GAm		A3F0GAm = ( ( 0/3 * ( H3N5 + H5N5D1 ) + 1/3 * ( H6N5Am1D2 ) + 2/3 * (0) + 3/3 * (0) ) / ( H3N5 + H5N5D1 + H6N5Am1D2 ) ) / ( ( 0/3 * ( H3N5 ) + 1/3 * (0) + 2/3 * ( H5N5D1 ) + 3/3 * ( H6N5Am1D2 ) ) / ( H3N5 + H5N5D1 + H6N5Am1D2 ) )
A1FGAm	α2,3-linked sialic acid per antenna within the monoantennary with galactosylation and fucosylation	A1FGAm = ( ( 0/1 * ( H4N3D1F1 + H3N3D2F4 ) + 1/1 * (0) ) / ( H4N3D1F1 + H3N3D2F4 ) ) / ( ( 0/1 * ( H3N3D2F4 ) + 1/1 * ( H4N3D1F1 ) ) / ( H4N3D1F1 + H3N3D2F4 ) )
A2FGAm		A2FGAm = ( ( 0/2 * ( H3N4F1 + H4N4F1 + H4N4F2 + H5N4F1 + H5N4F2 + H4N4F1D1 + H5N4D1F1 + H5N4D2F1 ) + 1/2 * ( H5N4Am1F1 + H5N4Am1D1F1 ) + 2/2 * ( H5N4Am2F1 ) ) / ( H3N4F1 + H4N4F1 + H4N4F2 + H5N4F1 + H5N4F2 + H4N4F1D1 + H5N4Am1F1 + H5N4D1F1 + H5N4Am2F1 + H5N4Am1D1F1 + H5N4D2F1 ) ) / ( ( 0/2 * ( H3N4F1 ) + 1/2 * ( H4N4F1 + H4N4F2 + H4N4F1D1 ) + 2/2 * ( H5N4F1 + H5N4F2 + H5N4Am1F1 + H5N4D1F1 + H5N4A…
A3FGAm		A3FGAm = ( ( 0/3 * ( H3N5F1 + H4N5F1 + H4N5F2 + H5N5F1 + H4N5F3 + H5N5F2 + H4N5D1F1 + H6N5F1 + H5N5F3 + H5N5D1F1 + H5N5D1F2 + H6N5D1F1 + H5N5D2F1 + H6N5D1F3 ) + 1/3 * ( H6N5Am1F1 + H6N5Am1D1F1 ) + 2/3 * ( H6N5Am2F1 ) + 3/3 * (0) ) / ( H3N5F1 + H4N5F1 + H4N5F2 + H5N5F1 + H4N5F3 + H5N5F2 + H4N5D1F1 + H6N5F1 + H5N5F3 + H5N5D1F1 + H6N5Am1F1 + H5N5D1F2 + H6N5D1F1 + H5N5D2F1 + H6N5Am2F1 + H6N5Am1D1F1 +…
A4FGAm	α2,6-linked sialic acid per antenna within monoantennary with galactosylation	A4FGAm = ( ( 0/4 * ( H3N6F1 + H4N6F2 + H5N6F2 + H4N6D1F1 + H5N6F3 + H5N6D1F1 + H6N6F3 + H5N6D1F2 + H6N6D1F1 + H6N6F4 + H7N6D1F1 + H6N6D1F3 + H7N6D1F2 ) + 1/4 * (0) + 2/4 * (0) + 3/4 * (0) + 4/4 * (0) ) / ( H3N6F1 + H4N6F2 + H5N6F2 + H4N6D1F1 + H5N6F3 + H5N6D1F1 + H6N6F3 + H5N6D1F2 + H6N6D1F1 + H6N6F4 + H7N6D1F1 + H6N6D1F3 + H7N6D1F2 ) ) / ( ( 0/4 * ( H3N6F1 ) + 1/4 * ( H4N6F2 + H4N6D1F1 ) + 2/4 *…
A1GD		A1GD = ( ( 0/1 * (0) + 1/1 * ( H4N3D1F1 ) ) / ( H4N3D1F1 + H3N3D2F4 ) ) / ( ( 0/1 * ( H3N3D2F4 ) + 1/1 * ( H4N3D1F1 ) ) / ( H4N3D1F1 + H3N3D2F4 ) )
A2GD		A2GD = ( ( 0/2 * ( H3N4F1 + H4N4F1 + H4N4F2 + H5N4F1 + H5N4F2 + H5N4Am1F1 + H5N4Am2F1 ) + 1/2 * ( H4N4F1D1 + H5N4D1 + H5N4D1F1 + H5N4Am1D1F1 ) + 2/2 * ( H5N4D2 + H5N4D2F1 ) ) / ( H3N4F1 + H4N4F1 + H4N4F2 + H5N4F1 + H5N4F2 + H4N4F1D1 + H5N4D1 + H5N4Am1F1 + H5N4D1F1 + H5N4D2 + H5N4Am2F1 + H5N4Am1D1F1 + H5N4D2F1 ) ) / ( ( 0/2 * ( H3N4F1 ) + 1/2 * ( H4N4F1 + H4N4F2 + H4N4F1D1 ) + 2/2 * ( H5N4F1 + H5N…
A3GD		A3GD = ( ( 0/3 * ( H3N5 + H3N5F1 + H4N5F1 + H4N5F2 + H5N5F1 + H4N5F3 + H5N5F2 + H6N5F1 + H5N5F3 + H6N5Am1F1 + H6N5Am2F1 ) + 1/3 * ( H4N5D1F1 + H5N5D1 + H5N5D1F1 + H5N5D1F2 + H6N5D1F1 + H6N5Am1D1F1 + H6N5D1F3 ) + 2/3 * ( H5N5D2F1 + H6N5Am1D2 ) + 3/3 * (0) ) / ( H3N5 + H3N5F1 + H4N5F1 + H4N5F2 + H5N5F1 + H4N5F3 + H5N5F2 + H4N5D1F1 + H6N5F1 + H5N5D1 + H5N5F3 + H5N5D1F1 + H6N5Am1F1 + H5N5D1F2 + H6N5D…
A4GD	α2,6-linked sialic acid per antenna in monoantennary with galactosylation and no-fucosylation	A4GD = ( ( 0/4 * ( H3N6F1 + H4N6F2 + H5N6F2 + H5N6F3 + H6N6F3 + H6N6F4 ) + 1/4 * ( H4N6D1F1 + H5N6D1F1 + H5N6D1F2 + H6N6D1F1 + H7N6D1F1 + H6N6D1F3 + H7N6D1F2 ) + 2/4 * (0) + 3/4 * (0) + 4/4 * (0) ) / ( H3N6F1 + H4N6F2 + H5N6F2 + H4N6D1F1 + H5N6F3 + H5N6D1F1 + H6N6F3 + H5N6D1F2 + H6N6D1F1 + H6N6F4 + H7N6D1F1 + H6N6D1F3 + H7N6D1F2 ) ) / ( ( 0/4 * ( H3N6F1 ) + 1/4 * ( H4N6F2 + H4N6D1F1 ) + 2/4 * ( H…
A2F0GD		A2F0GD = ( ( 0/2 * (0) + 1/2 * ( H5N4D1 ) + 2/2 * ( H5N4D2 ) ) / ( H5N4D1 + H5N4D2 ) ) / ( ( 0/2 * (0) + 1/2 * (0) + 2/2 * ( H5N4D1 + H5N4D2 ) ) / ( H5N4D1 + H5N4D2 ) )
A3F0GD		A3F0GD = ( ( 0/3 * ( H3N5 ) + 1/3 * ( H5N5D1 ) + 2/3 * ( H6N5Am1D2 ) + 3/3 * (0) ) / ( H3N5 + H5N5D1 + H6N5Am1D2 ) ) / ( ( 0/3 * ( H3N5 ) + 1/3 * (0) + 2/3 * ( H5N5D1 ) + 3/3 * ( H6N5Am1D2 ) ) / ( H3N5 + H5N5D1 + H6N5Am1D2 ) )
A1FGD	α2,6-linked sialic acid per antenna within monoantennary with galactosylation and fucosylation	A1FGD = ( ( 0/1 * (0) + 1/1 * ( H4N3D1F1 ) ) / ( H4N3D1F1 + H3N3D2F4 ) ) / ( ( 0/1 * ( H3N3D2F4 ) + 1/1 * ( H4N3D1F1 ) ) / ( H4N3D1F1 + H3N3D2F4 ) )
A2FGD		A2FGD = ( ( 0/2 * ( H3N4F1 + H4N4F1 + H4N4F2 + H5N4F1 + H5N4F2 + H5N4Am1F1 + H5N4Am2F1 ) + 1/2 * ( H4N4F1D1 + H5N4D1F1 + H5N4Am1D1F1 ) + 2/2 * ( H5N4D2F1 ) ) / ( H3N4F1 + H4N4F1 + H4N4F2 + H5N4F1 + H5N4F2 + H4N4F1D1 + H5N4Am1F1 + H5N4D1F1 + H5N4Am2F1 + H5N4Am1D1F1 + H5N4D2F1 ) ) / ( ( 0/2 * ( H3N4F1 ) + 1/2 * ( H4N4F1 + H4N4F2 + H4N4F1D1 ) + 2/2 * ( H5N4F1 + H5N4F2 + H5N4Am1F1 + H5N4D1F1 + H5N4Am…
A3FGD		A3FGD = ( ( 0/3 * ( H3N5F1 + H4N5F1 + H4N5F2 + H5N5F1 + H4N5F3 + H5N5F2 + H6N5F1 + H5N5F3 + H6N5Am1F1 + H6N5Am2F1 ) + 1/3 * ( H4N5D1F1 + H5N5D1F1 + H5N5D1F2 + H6N5D1F1 + H6N5Am1D1F1 + H6N5D1F3 ) + 2/3 * ( H5N5D2F1 ) + 3/3 * (0) ) / ( H3N5F1 + H4N5F1 + H4N5F2 + H5N5F1 + H4N5F3 + H5N5F2 + H4N5D1F1 + H6N5F1 + H5N5F3 + H5N5D1F1 + H6N5Am1F1 + H5N5D1F2 + H6N5D1F1 + H5N5D2F1 + H6N5Am2F1 + H6N5Am1D1F1 + …
A4FGD		A4FGD = ( ( 0/4 * ( H3N6F1 + H4N6F2 + H5N6F2 + H5N6F3 + H6N6F3 + H6N6F4 ) + 1/4 * ( H4N6D1F1 + H5N6D1F1 + H5N6D1F2 + H6N6D1F1 + H7N6D1F1 + H6N6D1F3 + H7N6D1F2 ) + 2/4 * (0) + 3/4 * (0) + 4/4 * (0) ) / ( H3N6F1 + H4N6F2 + H5N6F2 + H4N6D1F1 + H5N6F3 + H5N6D1F1 + H6N6F3 + H5N6D1F2 + H6N6D1F1 + H6N6F4 + H7N6D1F1 + H6N6D1F3 + H7N6D1F2 ) ) / ( ( 0/4 * ( H3N6F1 ) + 1/4 * ( H4N6F2 + H4N6D1F1 ) + 2/4 * ( …

## Sheet: S2_Derived-Trait+statistic
Table S2. Feature selection by Kruskal-Wallis test (KW). Selected features were tested for significance using a Wilcoxon rank sum test (WRS) and corrected for multiple testing using the Benjamini-Hochberg method (BH). NE = adjacent normal epithelium, LGD = low-grade dysplasia, HGD = high-grade dysplasia, CA = carcinoma
	NE vs. LGD				NE vs. HGD				NE vs. CA				LGD vs. HGD				LGD vs. CA				HGD vs. CA
Derived trait	p-value KW	p-value WRS	BH	Fold change N/LG	p-value KW	p-value WRS	BH	Fold change N/HG	p-value KW	p-value WRS	BH	Fold change N/C	p-value KW	p-value WRS	BH	Fold change LG/HG	p-value KW	p-value WRS	BH	Fold change LG/C	p-value KW	p-value WRS	BH	Fold change HG/C
TM	4.87825e-06	5.27861e-06	0.000109067	0.495181	0.000120629	0.000120629	0.00213758	0.427206	5.92534e-05	6.52929e-05	0.000424404	0.582402									0.0146974	0.0135747	0.0471685	1.36328
THy
TC	7.76549e-06	8.38978e-06	0.000109067	1.17056	0.000119983	0.000134952	0.00213758	1.25618	0.000138866	0.000152339	0.000482544	1.12111									0.0247074	0.0234471	0.0471685	0.892477
MM																	0.00316276	0.00344338	0.0125409	0.897876
MHy	4.6424e-05	4.98391e-05	0.000431939	0.461999	0.000120952	0.000136026	0.00213758	0.320787	9.61659e-05	0.000105698	0.000482544	0.392012	0.0193595	0.0211594	0.0421885	0.694345
CSFa
CSF	0.012399	0.0129908	0.0241259	1.08107													0.00839684	0.0090721	0.0197452	0.987026
CS					0.0140012	0.0151688	0.0256301	0.844459
CG									0.00112	0.00121405	0.00175853	0.937712					0.0122685	0.0132134	0.0212564	1.5454
CFa+S
CFa+D
CFa
CF0	0.0340316	0.0354538	0.0400782	0.798103
CF+S									0.00382721	0.00411628	0.0044593	0.819238					0.00374648	0.00407364	0.0125409	1.3156
CF+D					0.0301758	0.0324461	0.0378538	0.743496
CF+Am																	0.011398	0.0122833	0.0212564	0.962247	0.0317949	0.0330111	0.0471685	0.682022
CF	0.0340316	0.0354538	0.0400782	1.04556
CDFa
CDF
CD					0.00601821	0.00657029	0.0139976	0.767935
CAmF																	0.0218455	0.0234094	0.0298671	0.924422	0.0509619	0.055327	0.055327	0.940268
CAm																	0.0122536	0.0131977	0.0212564	1.79762	0.0356619	0.0346565	0.0471685	0.719078
CA4					0.0223845	0.0241414	0.0320031	0.735863					0.0230695	0.0251646	0.0421885	0.724217
CA3					0.0279629	0.0300912	0.0368963	1.15315	0.000875479	0.000950416	0.00164978	1.31347					0.00343232	0.00373465	0.0125409	1.38077
CA2
CA1					0.00594946	0.00649666	0.0139976	0.585034
A4SFa
A4S
A4GS
A4GD
A4G
A4FS
A4FGS
A4FGD
A4FG
A4FD
A4FaS
A4Fa									0.000951797	0.00103274	0.0016782	0.878888					0.0398326	0.0424452	0.0424452	0.881539
A4DFa
A4D
A3SFa
A3SF					0.0224074	0.0241656	0.0320031	0.957443	4.88298e-05	5.38596e-05	0.000424404	0.917262	0.0274607	0.0298936	0.0427051	0.961059	0.000182541	0.000202661	0.00749845	0.739692
A3S0F
A3S					0.00179222	0.00197644	0.00744965	0.681313	0.00112318	0.00121744	0.00175853	0.697298					0.035015	0.0373577	0.0394925	0.958846
A3GS					0.0191808	0.020718	0.029921	0.832358
A3GD																					0.0190253	0.0172768	0.0471685	1.23592
A3GAm					0.0128829	0.0139685	0.0253502	0.730472	0.000876769	0.000951797	0.00164978	0.651399					0.011398	0.0122833	0.0212564	0.668363
A3G	0.0313568	0.0326828	0.0400782	0.886513	0.00350852	0.00384793	0.00992361	0.819407	4.43433e-05	4.89345e-05	0.000424404	0.765387					0.00374056	0.00406731	0.0125409	1.27905
A3FS					0.00318616	0.0034973	0.00992361	0.670503	0.000875479	0.000950416	0.00164978	0.660253	0.0251646	0.0274225	0.0421885	0.751175	0.0132291	0.0142387	0.0219513	0.640715
A3FGS					0.0140012	0.0151688	0.0256301	0.826133					0.0325094	0.035319	0.0441487	0.807579
A3FGD																					0.0357753	0.0353764	0.0471685	1.23231
A3FGAm					0.0259657	0.0279629	0.0360575	0.75232	0.00131715	0.00142632	0.00176832	0.637135					0.0034268	0.00372874	0.0125409	0.701792
A3FG	0.020453	0.0213704	0.0326842	0.88799	0.00350852	0.00384793	0.00992361	0.817892	4.42474e-05	4.88298e-05	0.000424404	0.75626					0.0015625	0.00171	0.0125409	1.25279
A3FD					0.00319136	0.00350291	0.00992361	0.699982					0.0325094	0.035319	0.0441487	0.75575
A3FaS					0.0222927	0.0240446	0.0320031	0.597151					0.0250926	0.0273461	0.0421885	0.619375
A3FAm					0.00851007	0.00926225	0.018154	0.614848	0.000288222	0.000314911	0.000744336	0.480089					0.00405468	0.00440626	0.0125409	0.891781	0.0509619	0.055327	0.055327	0.780826
A3Fa
A3F0S					0.0348301	0.0373955	0.0407195	0.749025
A3F0GS					0.019222	0.0207615	0.029921	0.872286	0.00013913	0.000152625	0.000482544	0.871144
A3F0GD					0.0192014	0.0207398	0.029921	0.943223	0.000125794	0.000138077	0.000482544	0.942674
A3F0GAm					0.0192014	0.0207398	0.029921	0.6597	0.000152339	0.000167034	0.000482544	0.657405
A3F0G
A3F0D					0.0461135	0.0493623	0.0493623	0.80432
A3F0Am					0.0279898	0.0301194	0.0368963	0.584476	0.00131353	0.00142244	0.00176832	0.603471
A3F0
A3F
A3DFa																	0.00838569	0.00906027	0.0197452	0.718235
A3DF					0.0301194	0.0323869	0.0378538	0.948275									0.0177061	0.0190089	0.0251189	0.620727
A3D0F
A3D					0.00290528	0.00319136	0.00992361	0.719597
A3AmF																	0.032769	0.0349838	0.0392243	1.26327
A3Am0F
A3Am					0.00420391	0.00460373	0.0112791	0.602297	0.000264126	0.000288721	0.000744336	0.49921					0.00838569	0.00906027	0.0197452	0.579794
A2SG
A2SF	0.00206872	0.00218673	0.00812214	1.2018													0.00098561	0.00108216	0.0125409	0.816199
A2S0G
A2S	0.0433485	0.045094	0.045094	0.897623
A2GS	0.0400701	0.0417033	0.0433715	0.909963
A2GD	0.00185278	0.00195945	0.00812214	0.766705	0.0348301	0.0373955	0.0407195	0.774255									0.00718952	0.0077774	0.0197452	0.863368
A2GAm	0.00139188	0.00147393	0.00812214	1.32499													0.00129954	0.0014241	0.0125409	0.744808	0.0111698	0.0096668	0.0471685	0.682497
A2G
A2FSG																	0.0396632	0.0422687	0.0424452	1.28945	0.0502526	0.0532703	0.055327	0.985604
A2FS0G
A2FS																	0.0349838	0.0373252	0.0394925	0.665531
A2FGS
A2FGD	0.0039558	0.00416872	0.010048	0.758569	0.00460373	0.00503768	0.0117546	0.653129													0.0217462	0.0200535	0.0471685	1.42272
A2FGAm	0.0186877	0.019536	0.0317737	1.14263	0.034799	0.037363	0.0407195	1.19004									0.00315244	0.00343232	0.0125409	1.04441	0.0146974	0.0135747	0.0471685	0.749686
A2FG
A2FD	0.00355232	0.00374551	0.010048	0.765533	0.00239801	0.00263832	0.0092341	0.662627													0.040424	0.0430893	0.0530329	1.36608
A2FAm	0.0264828	0.0276302	0.0399102	1.14668													0.00373465	0.00406099	0.0125409	0.780789	0.0190988	0.0172768	0.0471685	0.712479
A2Fa	0.00846191	0.00888361	0.0177672	1.58785
A2F0S
A2F0GS
A2F0GD
A2F0D
A2F0	0.00440302	0.00463755	0.010048	0.714868													0.0164637	0.0176866	0.0251189	0.660431
A2F	0.00440302	0.00463755	0.010048	1.13894													0.0164637	0.0176866	0.0251189	0.851654
A2DF	0.0384644	0.0400423	0.0433715	1.16105													0.0286976	0.0306753	0.0354683	0.672003
A2D	0.0028767	0.00303613	0.00986741	0.757976	0.0401541	0.0430467	0.0439435	0.767098									0.0113839	0.0122685	0.0212564	0.804837
A2Am0F	0.0187042	0.0195531	0.0317737	1.17021
A2Am	0.00156279	0.00165404	0.00812214	1.3012													0.00223273	0.00243718	0.0125409	0.920726	0.0280117	0.0268408	0.0471685	0.666033
A1SFa					0.000469916	0.00052349	0.00213758	1.44582					0.0161569	0.0176948	0.0393218	1.3369
A1S					0.000469916	0.00052349	0.00213758	0.552394					0.0161569	0.0176948	0.0393218	0.661755
A1G					0.000469916	0.00052349	0.00213758	0.552394					0.0161569	0.0176948	0.0393218	0.661755
A1FS					0.000469916	0.00052349	0.00213758	0.552394					0.0161569	0.0176948	0.0393218	0.661755
A1FG					0.000469916	0.00052349	0.00213758	0.552394					0.0161569	0.0176948	0.0393218	0.661755
A1FD					0.000469916	0.00052349	0.00213758	0.552394					0.0161569	0.0176948	0.0393218	0.661755
A1Fa					0.000469916	0.00052349	0.00213758	1.44582					0.0161569	0.0176948	0.0393218	1.3369
A1DFa					0.000469916	0.00052349	0.00213758	1.44582					0.0161569	0.0176948	0.0393218	1.3369
A1D					0.000469916	0.00052349	0.00213758	0.552394					0.0161569	0.0176948	0.0393218	0.661755

## Sheet: S3_MS2-identification+structure
Table S3. Overview of the 58 N-glycans detected by MALDI-MSI. For the graphical representation of the N-glycan compositions, except from the sialic acid linkage-isomers, the monosaccharide linkages were not determined. Proposed glycan structures are based on fragmentation and literature.GirP: Girard’s reagent P label. The mass highlighted in green were found as precursor.
#	Structure confirmed by MS2	Confirmed features by MS2	Proposed structure	Composition		Theoretical mass (Glycan + GirP)
						[M]+	[M+H]2+	[M+2H]3+	[M+3H]4+
1	x			H5N2	1216.42	1368.51	684.756	456.84	342.882
2	x	Core-fucose		H3N3F1	1241.45	1393.54	697.272	465.184	349.14
3	x			H6N2	1378.48	1530.56	765.783	510.858	383.395
4	x	Hybrid		H4N3F1	1403.51	1555.59	778.298	519.201	389.653
5	x	Core-fucose		H3N4F1	1444.53	1596.62	798.812	532.877	399.91
6	x	Bisection		H3N5	1501.56	1653.64	827.322	551.884	414.165
7	x			H7N2	1540.53	1692.61	846.809	564.875	423.908
8	x	Core-fucose/ Antenna fucose		H4N3F2	1549.57	1701.65	851.327	567.887	426.167
9	x			H5N3F1	1565.56	1717.64	859.325	573.219	430.166
10	x	Core-fucose		H4N4F1	1606.59	1758.67	879.838	586.895	440.423
11	x	Core-fucose/ Bisection		H3N5F1	1647.61	1799.7	900.351	600.57	450.679
12	x			H8N2	1702.58	1854.66	927.835	618.893	464.421
13	x			H4N3D1F1	1722.63	1874.72	937.862	625.577	469.435
14	x	Core-fucose/ Antenna fucose		H4N4F2	1752.64	1904.73	952.867	635.581	476.937
15	x	Core-fucose		H5N4F1	1768.64	1920.72	960.865	640.912	480.936
16	x	Core-fucose/Bisection		H4N5F1	1809.67	1961.75	981.378	654.588	491.193
17	x	Core-fucose/Bisection		H3N6F1	1850.69	2002.78	1001.89	668.263	501.449
18	x			H9N2	1864.63	2016.72	1008.86	672.91	504.935
19	x	Core-fucose/ Antenna fucose		H5N4F2	1914.7	2066.78	1033.89	689.598	517.45
20	x	Core-fucose		H4N4F1D1	1925.71	2077.8	1039.4	693.27	520.204
21	x			H5N4D1	1941.71	2093.79	1047.4	698.602	524.203
22	x	Core-fucose/ Antenna fucose/ Bisection		H4N5F2	1955.72	2107.81	1054.41	703.274	527.707
23	x	Core-fucose/Bisection		H5N5F1	1971.72	2123.8	1062.4	708.605	531.706
24	x			H5N4Am1F1	2058.75	2210.83	1105.92	737.616	553.464
25	x			H5N4D1F1	2087.77	2239.85	1120.43	747.288	560.718
26	x	Core-fucose/ Lewis Y		H4N5F3	2101.78	2253.86	1127.44	751.96	564.222
27	x	Bisection		H5N5F2	2117.78	2269.86	1135.43	757.291	568.22
28	x	Core-fucose/Bisection		H4N5D1F1	2128.79	2280.88	1140.94	760.963	570.974
29	x	LacNac repeat		H6N5F1	2133.77	2285.85	1143.43	762.623	572.219
30				H5N5D1	2144.79	2296.87	1148.94	766.295	574.973
31				H4N6F2	2158.8	2310.89	1155.95	770.967	578.477
32				H4N6D1F1	2185.81	2337.9	1169.45	779.97	585.23
33	x			H5N4D2	2260.84	2412.92	1206.96	804.977	603.985
34	x	Core-fucose/ Lewis Y/ Bisection		H5N5F3	2263.83	2415.92	1208.46	805.977	604.735
35	x	Bisection		H5N5D1F1	2290.85	2442.93	1221.97	814.981	611.487
36				H3N3D2F4	2317.88	2469.96	1235.49	823.993	618.246
37	x			H5N4Am2F1	2348.86	2500.94	1250.98	834.32	625.992
38	x			H5N4D1Am1F1	2377.88	2529.96	1265.48	843.992	633.245
39	x	Core-fucose		H5N4D2F1	2406.89	2558.98	1279.99	853.663	640.499
40	x	Core-fucose		H6N5Am1F1	2423.88	2575.97	1288.49	859.327	644.747
41				H5N5D1F2	2436.9	2588.99	1295	863.667	648.002
42	x			H6N5D1F1	2452.9	2604.98	1302.99	868.998	652.001
43				H5N6F3	2466.91	2619	1310	873.67	655.505
44				H5N6D1F1	2493.92	2646.01	1323.51	882.674	662.257
45				H5N7F2	2523.94	2676.02	1338.51	892.677	669.76
46	x	Core-fucose		H5N5D2F1	2609.97	2762.05	1381.53	921.356	691.269
47	x	Core-fucose/Antenna fucose		H5N6Am1F2	2610.97	2763.05	1382.03	921.688	691.518
48				H6N6F3	2628.97	2781.05	1391.03	927.688	696.018
49				H5N6D1F2	2639.98	2792.07	1396.54	931.36	698.772
50	x			H6N6D1F1	2655.98	2808.06	1404.53	936.692	702.771
51	x			H6N5Am2F1	2713.99	2866.08	1433.54	956.03	717.275
52	x			H6N5Am1D1F1	2743.01	2895.09	1448.05	965.702	724.529
53	x	Core-fucose/ Antenna fucose		H6N5D1F3	2745.01	2897.1	1449.05	966.37	725.03
54	x	Core-fucose/ Antenna fucose		H6N6F4	2775.02	2927.11	1464.06	976.374	732.532
55	x			H7N6D1F1	2818.03	2970.11	1485.56	990.709	743.284
56	x			H6N5Am1D2	2916.08	3068.16	1534.58	1023.39	767.796
57	x	Core-fucose/ Antenna fucose		H6N6D1F3	2948.09	3100.18	1550.59	1034.06	775.799
58	x	Core-fucose/ Antenna fucose/ LacNac repeat		H7N6D1F2	2964.09	3116.17	1558.59	1039.4	779.798
